# Supplementary material
Source: publisher figshare collection journal article supplement (https://acs.figshare.com/ndownloader/files/4864417)
Supplement: Supplementary file 1 [file 4864417]

## Sheet: Table S-1
ENSG ID	Expression pattern	Gene Symbol	Gene Name	FPKM	Info
ENSG00000205002	Kupffer Cell	AARD	Alanine and arginine rich domain containing protein	0
ENSG00000108798	Kupffer Cell	ABI3	ABI family, member 3	2.1	This gene encodes a member of an adaptor protein family. Members of this family encode proteins containing a homeobox homology domain, proline rich region and Src-homology 3 (SH3) domain, and are components of the Abi/WAVE complex which regulates actin polymerization. The encoded protein inhibits ectopic metastasis of tumor cells as well as cell migration. This may be accomplished through interac…
ENSG00000146386	Kupffer Cell	ABRACL	ABRA C-terminal like	13.1
ENSG00000114626	Kupffer Cell	ABTB1	Ankyrin repeat and BTB (POZ) domain containing 1	3.9	This gene encodes a protein with an ankyrin repeat region and two BTB/POZ domains, which are thought to be involved in protein-protein interactions. Expression of this gene is activated by the phosphatase and tensin homolog, a tumor suppressor. Alternate splicing results in three transcript variants. [provided by RefSeq, Mar 2010]
ENSG00000075624	Kupffer Cell	ACTB	Actin, beta	724.7	This gene encodes one of six different actin proteins. Actins are highly conserved proteins that are involved in cell motility, structure, and integrity. This actin is a major constituent of the contractile apparatus and one of the two nonmuscle cytoskeletal actins. [provided by RefSeq, Jul 2008]
ENSG00000184009	Kupffer Cell	ACTG1	Actin, gamma 1	400.8	Actins are highly conserved proteins that are involved in various types of cell motility, and maintenance of the cytoskeleton. In vertebrates, three main groups of actin isoforms, alpha, beta and gamma have been identified. The alpha actins are found in muscle tissues and are a major constituent of the contractile apparatus. The beta and gamma actins co-exist in most cell types as components of t…
ENSG00000139985	Kupffer Cell	ADAM21	ADAM metallopeptidase domain 21	0	This gene encodes a member of the ADAM (a disintegrin and metalloprotease domain) family. Members of this family are membrane-anchored proteins structurally related to snake venom disintegrins, and have been implicated in a variety of biological processes involving cell-cell and cell-matrix interactions, including fertilization, muscle development, and neurogenesis. The expression of this gene ex…
ENSG00000148700	Kupffer Cell	ADD3	Adducin 3 (gamma)	10.2	Adducins are heteromeric proteins composed of different subunits referred to as adducin alpha, beta and gamma. The three subunits are encoded by distinct genes and belong to a family of membrane skeletal proteins involved in the assembly of spectrin-actin network in erythrocytes and at sites of cell-cell contact in epithelial tissues. While adducins alpha and gamma are ubiquitously expressed, the…
ENSG00000204472	Kupffer Cell	AIF1	Allograft inflammatory factor 1	29.1	This gene is induced by cytokines and interferon. Its protein product is thought to be involved in negative regulation of growth of vascular smooth muscle cells, which contributes to the anti-inflammatory response to vessel wall trauma. Three transcript variants encoding different isoforms have been found for this gene. [provided by RefSeq, Sep 2008]
ENSG00000085662	Kupffer Cell	AKR1B1	Aldo-keto reductase family 1, member B1 (aldose reductase)	6.3	This gene encodes a member of the aldo/keto reductase superfamily, which consists of more than 40 known enzymes and proteins. This member catalyzes the reduction of a number of aldehydes, including the aldehyde form of glucose, and is thereby implicated in the development of diabetic complications by catalyzing the reduction of glucose to sorbitol. Multiple pseudogenes have been identified for th…
ENSG00000105221	Kupffer Cell	AKT2	V-akt murine thymoma viral oncogene homolog 2	12.9	This gene is a putative oncogene encoding a protein belonging to a subfamily of serine/threonine kinases containing SH2-like (Src homology 2-like) domains. The gene was shown to be amplified and overexpressed in 2 of 8 ovarian carcinoma cell lines and 2 of 15 primary ovarian tumors. Overexpression contributes to the malignant phenotype of a subset of human ductal pancreatic cancers. The encoded p…
ENSG00000149925	Kupffer Cell	ALDOA	Aldolase A, fructose-bisphosphate	58.6	The protein encoded by this gene, Aldolase A (fructose-bisphosphate aldolase), is a glycolytic enzyme that catalyzes the reversible conversion of fructose-1,6-bisphosphate to glyceraldehyde 3-phosphate and dihydroxyacetone phosphate. Three aldolase isozymes (A, B, and C), encoded by three different genes, are differentially expressed during development. Aldolase A is found in the developing embry…
ENSG00000110200	Kupffer Cell	ANAPC15	Anaphase promoting complex subunit 15	16
ENSG00000145700	Kupffer Cell	ANKRD31	Ankyrin repeat domain 31	0
ENSG00000163219	Kupffer Cell	ARHGAP25	Rho GTPase activating protein 25	3	ARHGAPs, such as ARHGAP25, encode negative regulators of Rho GTPases (see ARHA; MIM 165390), which are implicated in actin remodeling, cell polarity, and cell migration (Katoh and Katoh, 2004 [PubMed 15254788]).[supplied by OMIM, Mar 2008]
ENSG00000111348	Kupffer Cell	ARHGDIB	Rho GDP dissociation inhibitor (GDI) beta	46.3	Members of the Rho (or ARH) protein family (see MIM 165390) and other Ras-related small GTP-binding proteins (see MIM 179520) are involved in diverse cellular events, including cell signaling, proliferation, cytoskeletal organization, and secretion. The GTP-binding proteins are active only in the GTP-bound state. At least 3 classes of proteins tightly regulate cycling between the GTP-bound and GD…
ENSG00000240771	Kupffer Cell	ARHGEF25	Rho guanine nucleotide exchange factor (GEF) 25	0.9	Rho GTPases alternate between an inactive GDP-bound state and an active GTP-bound state, and GEFs facilitate GDP/GTP exchange. This gene encodes a guanine nucleotide exchange factor (GEF) which interacts with Rho GTPases involved in contraction of vascular smooth muscles, regulation of responses to angiotensin II and lens cell differentiation. Multiple transcript variants encoding different isofo…
ENSG00000050327	Kupffer Cell	ARHGEF5	Rho guanine nucleotide exchange factor (GEF) 5	2.6	Rho GTPases play a fundamental role in numerous cellular processes initiated by extracellular stimuli that work through G protein coupled receptors. The encoded protein may form a complex with G proteins and stimulate Rho-dependent signals. This protein may be involved in the control of cytoskeletal organization. [provided by RefSeq, Jul 2008]
ENSG00000130429	Kupffer Cell	ARPC1B	Actin related protein 2/3 complex, subunit 1B, 41kDa	11.6	This gene encodes one of seven subunits of the human Arp2/3 protein complex. This subunit is a member of the SOP2 family of proteins and is most similar to the protein encoded by gene ARPC1A. The similarity between these two proteins suggests that they both may function as p41 subunit of the human Arp2/3 complex that has been implicated in the control of actin polymerization in cells. It is possi…
ENSG00000104763	Kupffer Cell	ASAH1	N-acylsphingosine amidohydrolase (acid ceramidase) 1	26.8	This gene encodes a heterodimeric protein consisting of a nonglycosylated alpha subunit and a glycosylated beta subunit that is cleaved to the mature enzyme posttranslationally. The encoded protein catalyzes the synthesis and degradation of ceramide into sphingosine and fatty acid. Mutations in this gene have been associated with a lysosomal storage disorder known as Farber disease. Multiple tran…
ENSG00000136888	Kupffer Cell	ATP6V1G1	ATPase, H+ transporting, lysosomal 13kDa, V1 subunit G1	65.1	This gene encodes a component of vacuolar ATPase (V-ATPase), a multisubunit enzyme that mediates acidification of eukaryotic intracellular organelles. V-ATPase dependent organelle acidification is necessary for such intracellular processes as protein sorting, zymogen activation, receptor-mediated endocytosis, and synaptic vesicle proton gradient generation. V-ATPase is composed of a cytosolic V1 …
ENSG00000147439	Kupffer Cell	BIN3	Bridging integrator 3	3.6	The product of this gene is a member of the BAR domain protein family. The encoded protein is comprised solely of a BAR domain which is predicted to form coiled-coil structures and proposed to mediate dimerization, sense and induce membrane curvature, and bind small GTPases. BAR domain proteins have been implicated in endocytosis, intracellular transport, and a diverse set of other processes. [pr…
ENSG00000204217	Kupffer Cell	BMPR2	Bone morphogenetic protein receptor, type II (serine/threonine kinase)	6.1	This gene encodes a member of the bone morphogenetic protein (BMP) receptor family of transmembrane serine/threonine kinases. The ligands of this receptor are BMPs, which are members of the TGF-beta superfamily. BMPs are involved in endochondral bone formation and embryogenesis. These proteins transduce their signals through the formation of heteromeric complexes of two different types of serine …
ENSG00000010671	Kupffer Cell	BTK	Bruton agammaglobulinemia tyrosine kinase	1.4	The protein encoded by this gene plays a crucial role in B-cell development. Mutations in this gene cause X-linked agammaglobulinemia type 1, which is an immunodeficiency characterized by the failure to produce mature B lymphocytes, and associated with a failure of Ig heavy chain rearrangement. Alternative splicing results in multiple transcript variants encoding different isoforms. [provided by …
ENSG00000137720	Kupffer Cell	C11orf1	Chromosome 11 open reading frame 1	16.8
ENSG00000204954	Kupffer Cell	C12orf73	Chromosome 12 open reading frame 73	2.2
ENSG00000235162	Kupffer Cell	C12orf75	Chromosome 12 open reading frame 75	0.8
ENSG00000180336	Kupffer Cell	C17orf104	Chromosome 17 open reading frame 104	0
ENSG00000178074	Kupffer Cell	C2orf69	Chromosome 2 open reading frame 69	3.5
ENSG00000125730	Kupffer Cell	C3	Complement component 3	2172.5	Complement component C3 plays a central role in the activation of complement system. Its activation is required for both classical and alternative complement activation pathways. A peptide (C3a) derived from the encoded protein has antimicrobial activity, so people with C3 deficiency are susceptible to bacterial infection. [provided by RefSeq, Nov 2014]
ENSG00000146476	Kupffer Cell	C6orf211	Chromosome 6 open reading frame 211	11
ENSG00000100314	Kupffer Cell	CABP7	Calcium binding protein 7	0
ENSG00000128595	Kupffer Cell	CALU	Calumenin	24.6	The product of this gene is a calcium-binding protein localized in the endoplasmic reticulum (ER) and it is involved in such ER functions as protein folding and sorting. This protein belongs to a family of multiple EF-hand proteins (CERC) that include reticulocalbin, ERC-55, and Cab45 and the product of this gene. Alternatively spliced transcript variants encoding different isoforms have been ide…
ENSG00000077549	Kupffer Cell	CAPZB	Capping protein (actin filament) muscle Z-line, beta	63.6	This gene encodes the beta subunit of the barbed-end actin binding protein, which belongs to the F-actin capping protein family. The capping protein is a heterodimeric actin capping protein that blocks actin filament assembly and disassembly at the fast growing (barbed) filament ends and functions in regulating actin filament dynamics as well as in stabilizing actin filament lengths in muscle and…
ENSG00000187860	Kupffer Cell	CCDC157	Coiled-coil domain containing 157	0.1
ENSG00000161973	Kupffer Cell	CCDC42	Coiled-coil domain containing 42	0.1
ENSG00000182791	Kupffer Cell	CCDC87	Coiled-coil domain containing 87	0
ENSG00000168071	Kupffer Cell	CCDC88B	Coiled-coil domain containing 88B	0.5	This gene encodes a member of the hook-related protein family. Members of this family are characterized by an N-terminal potential microtubule binding domain, a central coiled-coiled and a C-terminal Hook-related domain. The encoded protein may be involved in linking organelles to microtubules. [provided by RefSeq, Oct 2009]
ENSG00000145386	Kupffer Cell	CCNA2	Cyclin A2	0.9	The protein encoded by this gene belongs to the highly conserved cyclin family, whose members are characterized by a dramatic periodicity in protein abundance through the cell cycle. Cyclins function as regulators of CDK kinases. Different cyclins exhibit distinct expression and degradation patterns which contribute to the temporal coordination of each mitotic event. In contrast to cyclin A1, whi…
ENSG00000112486	Kupffer Cell	CCR6	Chemokine (C-C motif) receptor 6	0.3	This gene encodes a member of the beta chemokine receptor family, which is predicted to be a seven transmembrane protein similar to G protein-coupled receptors. The gene is preferentially expressed by immature dendritic cells and memory T cells. The ligand of this receptor is macrophage inflammatory protein 3 alpha (MIP-3 alpha). This receptor has been shown to be important for B-lineage maturati…
ENSG00000163468	Kupffer Cell	CCT3	Chaperonin containing TCP1, subunit 3 (gamma)	35.2	The protein encoded by this gene is a molecular chaperone that is a member of the chaperonin containing TCP1 complex (CCT), also known as the TCP1 ring complex (TRiC). This complex consists of two identical stacked rings, each containing eight different proteins. Unfolded polypeptides enter the central cavity of the complex and are folded in an ATP-dependent manner. The complex folds various prot…
ENSG00000170458	Kupffer Cell	CD14	CD14 molecule	144.7	The protein encoded by this gene is a surface antigen that is preferentially expressed on monocytes/macrophages. It cooperates with other proteins to mediate the innate immune response to bacterial lipopolysaccharide. Alternative splicing results in multiple transcript variants encoding the same protein. [provided by RefSeq, Mar 2010]
ENSG00000177575	Kupffer Cell	CD163	CD163 molecule	25.9	The protein encoded by this gene is a member of the scavenger receptor cysteine-rich (SRCR) superfamily, and is exclusively expressed in monocytes and macrophages. It functions as an acute phase-regulated receptor involved in the clearance and endocytosis of hemoglobin/haptoglobin complexes by macrophages, and may thereby protect tissues from free hemoglobin-mediated oxidative damage. This protei…
ENSG00000134061	Kupffer Cell	CD180	CD180 molecule	1.2	CD180 is a cell surface molecule consisting of extracellular leucine-rich repeats (LRR) and a short cytoplasmic tail. The extracellular LRR is associated with a molecule called MD-1 and form the cell surface receptor complex, RP105/MD-1. It belongs to the family of pathogen receptors, Toll-like receptors (TLR). RP105/MD1, by working in concert with TLR4, controls B cell recognition and signaling …
ENSG00000158473	Kupffer Cell	CD1D	CD1d molecule	3.8	This gene encodes a divergent member of the CD1 family of transmembrane glycoproteins, which are structurally related to the major histocompatibility complex (MHC) proteins and form heterodimers with beta-2-microglobulin. The CD1 proteins mediate the presentation of primarily lipid and glycolipid antigens of self or microbial origin to T cells. The human genome contains five CD1 family genes orga…
ENSG00000090659	Kupffer Cell	CD209	CD209 molecule	1.5	This gene encodes a transmembrane receptor and is often referred to as DC-SIGN because of its expression on the surface of dendritic cells and macrophages. The encoded protein is involved in the innate immune system and recognizes numerous evolutionarily divergent pathogens ranging from parasites to viruses with a large impact on public health. The protein is organized into three distinct domains…
ENSG00000150637	Kupffer Cell	CD226	CD226 molecule	1.4	This gene encodes a glycoprotein expressed on the surface of NK cells, platelets, monocytes and a subset of T cells. It is a member of the Ig-superfamily containing 2 Ig-like domains of the V-set. The protein mediates cellular adhesion of platelets and megakaryocytic cells to vascular endothelial cells. The protein also plays a role in megakaryocytic cell maturation. Alternative splicing results …
ENSG00000167851	Kupffer Cell	CD300A	CD300a molecule	4.3	This gene encodes a member of the CD300 glycoprotein family of cell surface proteins found on leukocytes involved in immune response signaling pathways. This gene is located on chromosome 17 in a cluster with all but one of the other family members. Multiple transcript variants encoding different isoforms have been found for this gene. [provided by RefSeq, Feb 2012]
ENSG00000167850	Kupffer Cell	CD300C	CD300c molecule	0.3	The CMRF35 antigen, which was identified by reactivity with a monoclonal antibody, is present on monocytes, neutrophils, and some T and B lymphocytes (Jackson et al., 1992 [PubMed 1349532]).[supplied by OMIM, Mar 2008]
ENSG00000105383	Kupffer Cell	CD33	CD33 molecule	1.7
ENSG00000026508	Kupffer Cell	CD44	CD44 molecule (Indian blood group)	12.1	The protein encoded by this gene is a cell-surface glycoprotein involved in cell-cell interactions, cell adhesion and migration. It is a receptor for hyaluronic acid (HA) and can also interact with other ligands, such as osteopontin, collagens, and matrix metalloproteinases (MMPs). This protein participates in a wide variety of cellular functions including lymphocyte activation, recirculation and…
ENSG00000073754	Kupffer Cell	CD5L	CD5 molecule-like	30.5
ENSG00000129226	Kupffer Cell	CD68	CD68 molecule	79.5	This gene encodes a 110-kD transmembrane glycoprotein that is highly expressed by human monocytes and tissue macrophages. It is a member of the lysosomal/endosomal-associated membrane glycoprotein (LAMP) family. The protein primarily localizes to lysosomes and endosomes with a smaller fraction circulating to the cell surface. It is a type I integral membrane protein with a heavily glycosylated ex…
ENSG00000137101	Kupffer Cell	CD72	CD72 molecule	1.2
ENSG00000019582	Kupffer Cell	CD74	CD74 molecule, major histocompatibility complex, class II invariant chain	527.3	The protein encoded by this gene associates with class II major histocompatibility complex (MHC) and is an important chaperone that regulates antigen presentation for immune response. It also serves as cell surface receptor for the cytokine macrophage migration inhibitory factor (MIF) which, when bound to the encoded protein, initiates survival pathways and cell proliferation. This protein also i…
ENSG00000059758	Kupffer Cell	CDK17	Cyclin-dependent kinase 17	5.5	The protein encoded by this gene belongs to the cdc2/cdkx subfamily of the ser/thr family of protein kinases. It has similarity to a rat protein that is thought to play a role in terminally differentiated neurons. Alternatively spliced transcript variants encoding different isoforms have been found. [provided by RefSeq, Jul 2010]
ENSG00000086548	Kupffer Cell	CEACAM6	Carcinoembryonic antigen-related cell adhesion molecule 6 (non-specific cross reacting antigen)	0.1	This gene encodes a protein that belongs to the carcinoembryonic antigen (CEA) family whose members are glycosyl phosphatidyl inositol (GPI) anchored cell surface glycoproteins. Members of this family play a role in cell adhesion and are widely used as tumor markers in serum immunoassay determinations of carcinoma. This gene affects the sensitivity of tumor cells to adenovirus infection. The prot…
ENSG00000115816	Kupffer Cell	CEBPZ	CCAAT/enhancer binding protein (C/EBP), zeta	9.6
ENSG00000093072	Kupffer Cell	CECR1	Cat eye syndrome chromosome region, candidate 1	8.2	This gene encodes a member of a subfamily of the adenosine deaminase protein family. The encoded protein is one of two adenosine deaminases found in humans, which regulate levels of the signaling molecule, adenosine. The encoded protein is secreted from monocytes undergoing differentiation and may regulate cell proliferation and differentiation. This gene may be responsible for some of the phenot…
ENSG00000177946	Kupffer Cell	CENPBD1	CENPB DNA-binding domains containing 1	2.1
ENSG00000179583	Kupffer Cell	CIITA	Class II, major histocompatibility complex, transactivator	1	This gene encodes a protein with an acidic transcriptional activation domain, 4 LRRs (leucine-rich repeats) and a GTP binding domain. The protein is located in the nucleus and acts as a positive regulator of class II major histocompatibility complex gene transcription, and is referred to as the ""master control factor"" for the expression of these genes. The protein also binds GTP and uses GTP bi…
ENSG00000011021	Kupffer Cell	CLCN6	Chloride channel, voltage-sensitive 6	1.7	This gene encodes a member of the voltage-dependent chloride channel protein family. Members of this family can function as either chloride channels or antiporters. This protein is primarily localized to late endosomes and functions as a chloride/proton antiporter. Alternate splicing results in both coding and non-coding variants. Additional alternately spliced variants have been described but th…
ENSG00000196748	Kupffer Cell	CLPSL2	Colipase-like 2	0
ENSG00000158258	Kupffer Cell	CLSTN2	Calsyntenin 2	0.3
ENSG00000196167	Kupffer Cell	COLCA1	Colorectal cancer associated 1
ENSG00000130309	Kupffer Cell	COLGALT1	Collagen beta(1-O)galactosyltransferase 1	6.8
ENSG00000106066	Kupffer Cell	CPVL	Carboxypeptidase, vitellogenic-like	13.9	The protein encoded by this gene is a carboxypeptidase and bears strong sequence similarity to serine carboxypeptidases. Carboxypeptidases are a large class of proteases that act to cleave a single amino acid from the carboxy termini of proteins or peptides. The exact function of this protein, however, has not been determined. At least two alternatively spliced transcripts which encode the same p…
ENSG00000176390	Kupffer Cell	CRLF3	Cytokine receptor-like factor 3	2.1	This gene encodes a cytokine receptor-like factor that may negatively regulate cell cycle progression at the G0/G1 phase. Studies of the related rat protein suggest that it may regulate neuronal morphology and synaptic vesicle biogenesis. This gene is one of several genes located in the neurofibromatosis type I tumor suppressor region on the q arm of chromosome 17, a region that is subject to mic…
ENSG00000175029	Kupffer Cell	CTBP2	C-terminal binding protein 2	1.7	This gene produces alternative transcripts encoding two distinct proteins. One protein is a transcriptional repressor, while the other isoform is a major component of specialized synapses known as synaptic ribbons. Both proteins contain a NAD+ binding domain similar to NAD+-dependent 2-hydroxyacid dehydrogenases. A portion of the 3' untranslated region was used to map this gene to chromosome 21q2…
ENSG00000163131	Kupffer Cell	CTSS	Cathepsin S	51.4	The protein encoded by this gene, a member of the peptidase C1 family, is a lysosomal cysteine proteinase that may participate in the degradation of antigenic proteins to peptides for presentation on MHC class II molecules. The encoded protein can function as an elastase over a broad pH range in alveolar macrophages. Alternatively spliced transcript variants encoding distinct isoforms have been f…
ENSG00000187516	Kupffer Cell	CXorf27	Chromosome X open reading frame 27	0	This gene encodes a protein shown to interact with huntingtin, which contains an expanded polyglutamine tract in individuals with Huntington's disease (PMID: 9700202). [provided by RefSeq, Aug 2011]
ENSG00000051523	Kupffer Cell	CYBA	Cytochrome b-245, alpha polypeptide	28.6	Cytochrome b is comprised of a light chain (alpha) and a heavy chain (beta). This gene encodes the light, alpha subunit which has been proposed as a primary component of the microbicidal oxidase system of phagocytes. Mutations in this gene are associated with autosomal recessive chronic granulomatous disease (CGD), that is characterized by the failure of activated phagocytes to generate superoxid…
ENSG00000155016	Kupffer Cell	CYP2U1	Cytochrome P450, family 2, subfamily U, polypeptide 1	2.3	This gene encodes a member of the cytochrome P450 superfamily of enzymes. The cytochrome P450 proteins are monooxygenases which catalyze many reactions involved in drug metabolism and synthesis of cholesterol, steroids and other lipids. This enzyme is a hydroxylase that metabolizes arachidonic acid, docosahexaenoic acid, and other long chain fatty acids. [provided by RefSeq, Jul 2008]
ENSG00000153071	Kupffer Cell	DAB2	Dab, mitogen-responsive phosphoprotein, homolog 2 (Drosophila)	9.5	This gene encodes a mitogen-responsive phosphoprotein. It is expressed in normal ovarian epithelial cells, but is down-regulated or absent from ovarian carcinoma cell lines, suggesting its role as a tumor suppressor. This protein binds to the SH3 domains of GRB2, an adaptor protein that couples tyrosine kinase receptors to SOS (a guanine nucleotide exchange factor for Ras), via its C-terminal pro…
ENSG00000215301	Kupffer Cell	DDX3X	DEAD (Asp-Glu-Ala-Asp) box helicase 3, X-linked	45	The protein encoded by this gene is a member of the large DEAD-box protein family, that is defined by the presence of the conserved Asp-Glu-Ala-Asp (DEAD) motif, and has ATP-dependent RNA helicase activity. This protein has been reported to display a high level of RNA-independent ATPase activity, and unlike most DEAD-box helicases, the ATPase activity is thought to be stimulated by both RNA and D…
ENSG00000107201	Kupffer Cell	DDX58	DEAD (Asp-Glu-Ala-Asp) box polypeptide 58	2.8	DEAD box proteins, characterized by the conserved motif Asp-Glu-Ala-Asp (DEAD), are putative RNA helicases which are implicated in a number of cellular processes involving RNA binding and alteration of RNA secondary structure. This gene encodes a protein containing RNA helicase-DEAD box protein motifs and a caspase recruitment domain (CARD). It is involved in viral double-stranded (ds) RNA recogn…
ENSG00000160570	Kupffer Cell	DEDD2	Death effector domain containing 2	3.1	This gene encodes a nuclear-localized protein containing a death effector domain (DED). The encoded protein may regulate the trafficking of caspases and other proteins into the nucleus during death receptor-induced apoptosis. Alternative splicing results in multiple transcript variants. [provided by RefSeq, Jul 2012]
ENSG00000088782	Kupffer Cell	DEFB127	Defensin, beta 127	0	Defensins are cysteine-rich cationic polypeptides that are important in the immunologic response to invading microorganisms. The antimicrobial protein encoded by this gene is secreted and is a member of the beta defensin protein family. Beta defensin genes are found in several clusters throughout the genome, with this gene mapping to a cluster at 20p13. [provided by RefSeq, Nov 2014]
ENSG00000205593	Kupffer Cell	DENND6B	DENN/MADD domain containing 6B	0.2
ENSG00000228716	Kupffer Cell	DHFR	Dihydrofolate reductase	11.4	Dihydrofolate reductase converts dihydrofolate into tetrahydrofolate, a methyl group shuttle required for the de novo synthesis of purines, thymidylic acid, and certain amino acids. While the functional dihydrofolate reductase gene has been mapped to chromosome 5, multiple intronless processed pseudogenes or dihydrofolate reductase-like genes have been identified on separate chromosomes. Dihydrof…
ENSG00000178700	Kupffer Cell	DHFRL1	Dihydrofolate reductase-like 1	2.1
ENSG00000162595	Kupffer Cell	DIRAS3	DIRAS family, GTP-binding RAS-like 3	3.9	This gene is a member of the ras superfamily, and is expressed in normal ovarian and breast epithelial cells, but not in ovarian and breast cancers. It is an imprinted gene, with monoallelic expression of the paternal allele, which is associated with growth suppression. Thus, this gene appears to be a putative tumor suppressor gene whose function is abrogated in ovarian and breast cancers. [provi…
ENSG00000170946	Kupffer Cell	DNAJC24	DnaJ (Hsp40) homolog, subfamily C, member 24	2.7	Diphthamide is a unique posttranslationally modified histidine found only in translation elongation factor-2 (EEF2; MIM 130610). This modification is conserved from archaebacteria to humans and serves as the target for ADP-ribosylation and inactivation of EEF2 by diphtheria toxin (DT) and Pseudomonas exotoxin A. DPH4 is 1 of several enzymes involved in synthesis of diphthamide in EEF2 (Liu et al.…
ENSG00000179532	Kupffer Cell	DNHD1	Dynein heavy chain domain 1	0.4
ENSG00000154813	Kupffer Cell	DPH3	Diphthamide biosynthesis 3	5.8	This gene encodes a CSL zinc finger-containing protein that is required for dipthamide biosynthesis. The encoded protein is necessary for the initial step in the modification of a histidine residue in elongation factor-2 to diphthamide. This modified residue is a target for ADP ribosylation by the bacterial toxins diphtheria toxin and Pseudomonas exotoxin A. Alternative splicing results in multip…
ENSG00000197057	Kupffer Cell	DTHD1	Death domain containing 1	0	This gene encodes a protein which contains a death domain. Death domain-containing proteins function in signaling pathways and formation of signaling complexes, as well as the apoptosis pathway. Alternative splicing results in multiple transcript variants. [provided by RefSeq, Oct 2012]
ENSG00000157540	Kupffer Cell	DYRK1A	Dual-specificity tyrosine-(Y)-phosphorylation regulated kinase 1A	9.2	This gene encodes a member of the Dual-specificity tyrosine phosphorylation-regulated kinase (DYRK) family. This member contains a nuclear targeting signal sequence, a protein kinase domain, a leucine zipper motif, and a highly conservative 13-consecutive-histidine repeat. It catalyzes its autophosphorylation on serine/threonine and tyrosine residues. It may play a significant role in a signaling…
ENSG00000158163	Kupffer Cell	DZIP1L	DAZ interacting zinc finger protein 1-like	0.1
ENSG00000115468	Kupffer Cell	EFHD1	EF-hand domain family, member D1	14.2	EFHD1 is an EF-hand domain-containing protein that displays increased expression during neuronal differentiation (Tominaga and Tomooka, 2002 [PubMed 12270117]).[supplied by OMIM, Mar 2008]
ENSG00000127463	Kupffer Cell	EMC1	ER membrane protein complex subunit 1	6.1	This gene encodes a single-pass type I transmembrane protein, which is a subunit of the endoplasmic reticulum membrane protein complex (EMC). Multiple alternatively spliced transcript variants encoding different isoforms have been found for this gene. [provided by RefSeq, Sep 2012]
ENSG00000133193	Kupffer Cell	FAM104A	Family with sequence similarity 104, member A	3.8
ENSG00000197245	Kupffer Cell	FAM110D	Family with sequence similarity 110, member D	0
ENSG00000188163	Kupffer Cell	FAM166A	Family with sequence similarity 166, member A	0.2
ENSG00000165323	Kupffer Cell	FAT3	FAT atypical cadherin 3	0
ENSG00000186431	Kupffer Cell	FCAR	Fc fragment of IgA, receptor for	2.9	This gene is a member of the immunoglobulin gene superfamily and encodes a receptor for the Fc region of IgA. The receptor is a transmembrane glycoprotein present on the surface of myeloid lineage cells such as neutrophils, monocytes, macrophages, and eosinophils, where it mediates immunologic responses to pathogens. It interacts with IgA-opsonized targets and triggers several immunologic defense…
ENSG00000179639	Kupffer Cell	FCER1A	Fc fragment of IgE, high affinity I, receptor for; alpha polypeptide	1.2	The immunoglobulin epsilon receptor (IgE receptor) is the initiator of the allergic response. When two or more high-affinity IgE receptors are brought together by allergen-bound IgE molecules, mediators such as histamine that are responsible for allergy symptoms are released. This receptor is comprised of an alpha subunit, a beta subunit, and two gamma subunits. The protein encoded by this gene r…
ENSG00000158869	Kupffer Cell	FCER1G	Fc fragment of IgE, high affinity I, receptor for; gamma polypeptide	42.8	The high affinity IgE receptor is a key molecule involved in allergic reactions. It is a tetramer composed of 1 alpha, 1 beta, and 2 gamma chains. The gamma chains are also subunits of other Fc receptors. [provided by RefSeq, Jul 2008]
ENSG00000143226	Kupffer Cell	FCGR2A	Fc fragment of IgG, low affinity IIa, receptor (CD32)	4.8	This gene encodes one member of a family of immunoglobulin Fc receptor genes found on the surface of many immune response cells. The protein encoded by this gene is a cell surface receptor found on phagocytic cells such as macrophages and neutrophils, and is involved in the process of phagocytosis and clearing of immune complexes. Alternative splicing results in multiple transcript variants. [pro…
ENSG00000203747	Kupffer Cell	FCGR3A	Fc fragment of IgG, low affinity IIIa, receptor (CD16a)	34	This gene encodes a receptor for the Fc portion of immunoglobulin G, and it is involved in the removal of antigen-antibody complexes from the circulation, as well as other other antibody-dependent responses. This gene (FCGR3A) is highly similar to another nearby gene (FCGR3B) located on chromosome 1. The receptor encoded by this gene is expressed on natural killer (NK) cells as an integral membra…
ENSG00000104870	Kupffer Cell	FCGRT	Fc fragment of IgG, receptor, transporter, alpha	97.3	This gene encodes a receptor that binds the Fc region of monomeric immunoglobulin G. The encoded protein transfers immunoglobulin G antibodies from mother to fetus across the placenta. This protein also binds immunoglobulin G to protect the antibody from degradation. Alternative splicing results in multiple transcript variants. [provided by RefSeq, Apr 2009]
ENSG00000156427	Kupffer Cell	FGF18	Fibroblast growth factor 18	0	The protein encoded by this gene is a member of the fibroblast growth factor (FGF) family. FGF family members possess broad mitogenic and cell survival activities, and are involved in a variety of biological processes, including embryonic development, cell growth, morphogenesis, tissue repair, tumor growth, and invasion. It has been shown in vitro that this protein is able to induce neurite outgr…
ENSG00000172728	Kupffer Cell	FUT10	Fucosyltransferase 10 (alpha (1,3) fucosyltransferase)	0.6
ENSG00000163251	Kupffer Cell	FZD5	Frizzled family receptor 5	6.7	Members of the 'frizzled' gene family encode 7-transmembrane domain proteins that are receptors for Wnt signaling proteins. The FZD5 protein is believed to be the receptor for the Wnt5A ligand. [provided by RefSeq, Jul 2008]
ENSG00000117228	Kupffer Cell	GBP1	Guanylate binding protein 1, interferon-inducible	43.9	Guanylate binding protein expression is induced by interferon. Guanylate binding proteins are characterized by their ability to specifically bind guanine nucleotides (GMP, GDP, and GTP) and are distinguished from the GTP-binding proteins by the presence of 2 binding motifs rather than 3. [provided by RefSeq, Jul 2008]
ENSG00000168546	Kupffer Cell	GFRA2	GDNF family receptor alpha 2	0.5	Glial cell line-derived neurotrophic factor (GDNF) and neurturin (NTN) are two structurally related, potent neurotrophic factors that play key roles in the control of neuron survival and differentiation. The protein encoded by this gene is a member of the GDNF receptor family. It is a glycosylphosphatidylinositol(GPI)-linked cell surface receptor for both GDNF and NTN, and mediates activation of …
ENSG00000133574	Kupffer Cell	GIMAP4	GTPase, IMAP family member 4	9	This gene encodes a protein belonging to the GTP-binding superfamily and to the immuno-associated nucleotide (IAN) subfamily of nucleotide-binding proteins. The encoded protein of this gene may be negatively regulated by T-cell acute lymphocytic leukemia 1 (TAL1). In humans, the IAN subfamily genes are located in a cluster at 7q36.1. [provided by RefSeq, Jul 2008]
ENSG00000145888	Kupffer Cell	GLRA1	Glycine receptor, alpha 1	0	The protein encoded by this gene is a subunit of a pentameric inhibitory glycine receptor. The receptor mediates postsynaptic inhibition in the central nervous system. Defects in this gene are a cause of startle disease (STHE), also known as hereditary hyperekplexia or congenital stiff-person syndrome. Three transcript variants encoding different isoforms have been found for this gene. [provided …
ENSG00000114353	Kupffer Cell	GNAI2	Guanine nucleotide binding protein (G protein), alpha inhibiting activity polypeptide 2	55.3	The protein encoded by this gene is an alpha subunit of guanine nucleotide binding proteins (G proteins). The encoded protein contains the guanine nucleotide binding site and is involved in the hormonal regulation of adenylate cyclase. Several transcript variants encoding different isoforms have been found for this gene. [provided by RefSeq, Sep 2013]
ENSG00000163281	Kupffer Cell	GNPDA2	Glucosamine-6-phosphate deaminase 2	1.3	The protein encoded by this gene is an allosteric enzyme that catalyzes the reversible reaction converting D-glucosamine-6-phosphate into D-fructose-6-phosphate and ammonium. Variations of this gene have been reported to be associated with influencing body mass index and susceptibility to obesity. A pseudogene of this gene is located on chromosome 9. Alternative splicing results in multiple trans…
ENSG00000076650	Kupffer Cell	GPATCH1	G patch domain containing 1	1.2
ENSG00000164850	Kupffer Cell	GPER1	G protein-coupled estrogen receptor 1	4.1	This gene is a member of the G-protein coupled receptor 1 family and encodes a multi-pass membrane protein that localizes to the endoplasmic reticulum. The protein binds estrogen, resulting in intracellular calcium mobilization and synthesis of phosphatidylinositol 3,4,5-trisphosphate in the nucleus. This protein therefore plays a role in the rapid nongenomic signaling events widely observed foll…
ENSG00000180269	Kupffer Cell	GPR139	G protein-coupled receptor 139	0
ENSG00000166856	Kupffer Cell	GPR182	G protein-coupled receptor 182	1.1	Adrenomedullin is a potent vasodilator peptide that exerts major effects on cardiovascular function. This gene encodes a seven-transmembrane protein that belongs to the family 1 of G-protein coupled receptors. Studies of the rat counterpart suggest that the encoded protein may function as a receptor for adrenomedullin. [provided by RefSeq, Jul 2008]
ENSG00000233276	Kupffer Cell	GPX1	Glutathione peroxidase 1	77.7	This gene encodes a member of the glutathione peroxidase family. Glutathione peroxidase functions in the detoxification of hydrogen peroxide, and is one of the most important antioxidant enzymes in humans. This protein is one of only a few proteins known in higher vertebrates to contain selenocysteine, which occurs at the active site of glutathione peroxidase and is coded by UGA, that normally fu…
ENSG00000141449	Kupffer Cell	GREB1L	Growth regulation by estrogen in breast cancer-like	0.7
ENSG00000155974	Kupffer Cell	GRIP1	Glutamate receptor interacting protein 1	0.2	This gene encodes a member of the glutamate receptor interacting protein family. The encoded scaffold protein binds to and mediates the trafficking and membrane organization of a number of transmembrane proteins. Alternatively spliced transcript variants encoding different isoforms have been described. [provided by RefSeq, May 2010]
ENSG00000148180	Kupffer Cell	GSN	Gelsolin	29.1	The protein encoded by this gene binds to the ""plus"" ends of actin monomers and filaments to prevent monomer exchange. The encoded calcium-regulated protein functions in both assembly and disassembly of actin filaments. Defects in this gene are a cause of familial amyloidosis Finnish type (FAF). Multiple transcript variants encoding several different isoforms have been found for this gene. [pro…
ENSG00000213397	Kupffer Cell	HAUS7	HAUS augmin-like complex, subunit 7	2.6	This gene encodes a subunit of the augmin complex, which regulates centrosome and mitotic spindle integrity, and is necessary for the completion of cytokinesis. The encoded protein was identified by interaction with ubiquitin C-terminal hydrolase 37. Alternative splicing results in multiple transcript variants. [provided by RefSeq, Sep 2012]
ENSG00000101336	Kupffer Cell	HCK	Hemopoietic cell kinase	5	The protein encoded by this gene is a member of the Src family of tyrosine kinases. This protein is primarily hemopoietic, particularly in cells of the myeloid and B-lymphoid lineages. It may help couple the Fc receptor to the activation of the respiratory burst. In addition, it may play a role in neutrophil migration and in the degranulation of neutrophils. Multiple isoforms with different subce…
ENSG00000159399	Kupffer Cell	HK2	Hexokinase 2	1.6	Hexokinases phosphorylate glucose to produce glucose-6-phosphate, the first step in most glucose metabolism pathways. This gene encodes hexokinase 2, the predominant form found in skeletal muscle. It localizes to the outer membrane of mitochondria. Expression of this gene is insulin-responsive, and studies in rat suggest that it is involved in the increased rate of glycolysis seen in rapidly grow…
ENSG00000160883	Kupffer Cell	HK3	Hexokinase 3 (white cell)	1.9	Hexokinases phosphorylate glucose to produce glucose-6-phosphate, the first step in most glucose metabolism pathways. This gene encodes hexokinase 3. Similar to hexokinases 1 and 2, this allosteric enzyme is inhibited by its product glucose-6-phosphate. [provided by RefSeq, Apr 2009]
ENSG00000204257	Kupffer Cell	HLA-DMA	Major histocompatibility complex, class II, DM alpha	19.4	HLA-DMA belongs to the HLA class II alpha chain paralogues. This class II molecule is a heterodimer consisting of an alpha (DMA) and a beta chain (DMB), both anchored in the membrane. It is located in intracellular vesicles. DM plays a central role in the peptide loading of MHC class II molecules by helping to release the CLIP molecule from the peptide binding site. Class II molecules are express…
ENSG00000231389	Kupffer Cell	HLA-DPA1	Major histocompatibility complex, class II, DP alpha 1	105.2	HLA-DPA1 belongs to the HLA class II alpha chain paralogues. This class II molecule is a heterodimer consisting of an alpha (DPA) and a beta (DPB) chain, both anchored in the membrane. It plays a central role in the immune system by presenting peptides derived from extracellular proteins. Class II molecules are expressed in antigen presenting cells (APC: B lymphocytes, dendritic cells, macrophage…
ENSG00000223865	Kupffer Cell	HLA-DPB1	Major histocompatibility complex, class II, DP beta 1	77.5	HLA-DPB belongs to the HLA class II beta chain paralogues. This class II molecule is a heterodimer consisting of an alpha (DPA) and a beta chain (DPB), both anchored in the membrane. It plays a central role in the immune system by presenting peptides derived from extracellular proteins. Class II molecules are expressed in antigen presenting cells (APC: B lymphocytes, dendritic cells, macrophages)…
ENSG00000179344	Kupffer Cell	HLA-DQB1	Major histocompatibility complex, class II, DQ beta 1	20.2	HLA-DQB1 belongs to the HLA class II beta chain paralogs. This class II molecule is a heterodimer consisting of an alpha (DQA) and a beta chain (DQB), both anchored in the membrane. It plays a central role in the immune system by presenting peptides derived from extracellular proteins. Class II molecules are expressed in antigen presenting cells (APC: B lymphocytes, dendritic cells, macrophages).…
ENSG00000196126	Kupffer Cell	HLA-DRB1	Major histocompatibility complex, class II, DR beta 1	85.3	HLA-DRB1 belongs to the HLA class II beta chain paralogs. The class II molecule is a heterodimer consisting of an alpha (DRA) and a beta chain (DRB), both anchored in the membrane. It plays a central role in the immune system by presenting peptides derived from extracellular proteins. Class II molecules are expressed in antigen presenting cells (APC: B lymphocytes, dendritic cells, macrophages). …
ENSG00000180448	Kupffer Cell	HMHA1	Histocompatibility (minor) HA-1	1.7
ENSG00000100292	Kupffer Cell	HMOX1	Heme oxygenase (decycling) 1	34.5	Heme oxygenase, an essential enzyme in heme catabolism, cleaves heme to form biliverdin, which is subsequently converted to bilirubin by biliverdin reductase, and carbon monoxide, a putative neurotransmitter. Heme oxygenase activity is induced by its substrate heme and by various nonheme substances. Heme oxygenase occurs as 2 isozymes, an inducible heme oxygenase-1 and a constitutive heme oxygena…
ENSG00000164120	Kupffer Cell	HPGD	Hydroxyprostaglandin dehydrogenase 15-(NAD)	56.4	This gene encodes a member of the short-chain nonmetalloenzyme alcohol dehydrogenase protein family. The encoded enzyme is responsible for the metabolism of prostaglandins, which function in a variety of physiologic and cellular processes such as inflammation. Mutations in this gene result in primary autosomal recessive hypertrophic osteoarthropathy and cranioosteoarthropathy. Multiple transcript…
ENSG00000216490	Kupffer Cell	IFI30	Interferon, gamma-inducible protein 30	55.3	The protein encoded by this gene is a lysosomal thiol reductase that at low pH can reduce protein disulfide bonds. The enzyme is expressed constitutively in antigen-presenting cells and induced by gamma-interferon in other cell types. This enzyme has an important role in MHC class II-restricted antigen processing. [provided by RefSeq, Jul 2008]
ENSG00000185745	Kupffer Cell	IFIT1	Interferon-induced protein with tetratricopeptide repeats 1	15.5	This gene encodes a protein containing tetratricopeptide repeats that was originally identified as induced upon treatment with interferon. The encoded protein may inhibit viral replication and translational initiation. This gene is located in a cluster on chromosome 10 with five other closely related genes. There is a pseudogene for this gene on chromosome 13. Alternatively spliced transcript var…
ENSG00000150782	Kupffer Cell	IL18	Interleukin 18 (interferon-gamma-inducing factor)	2.1	The protein encoded by this gene is a proinflammatory cytokine that augments natural killer cell activity in spleen cells, and stimulates interferon gamma production in T-helper type I cells. Alternatively spliced transcript variants encoding different isoforms have been found for this gene.[provided by RefSeq, Aug 2011]
ENSG00000104613	Kupffer Cell	INTS10	Integrator complex subunit 10	15.4	INTS10 is a subunit of the Integrator complex, which associates with the C-terminal domain of RNA polymerase II large subunit (POLR2A; MIM 180660) and mediates 3-prime end processing of small nuclear RNAs U1 (RNU1; MIM 180680) and U2 (RNU2; MIM 180690) (Baillat et al., 2005 [PubMed 16239144]).[supplied by OMIM, Mar 2008]
ENSG00000117408	Kupffer Cell	IPO13	Importin 13	2.2	This gene encodes a member of the importin-beta family of nuclear transport proteins. The encoded protein mediates the import of specific cargo proteins from the cytoplasm to the nucleus and is dependent on the Ras-related nuclear protein-GTPase system. The encoded protein is also involved in nuclear export of the eukaryotic translation initiation factor 1A.[provided by RefSeq, Mar 2009]
ENSG00000140575	Kupffer Cell	IQGAP1	IQ motif containing GTPase activating protein 1	7.6	This gene encodes a member of the IQGAP family. The protein contains four IQ domains, one calponin homology domain, one Ras-GAP domain and one WW domain. It interacts with components of the cytoskeleton, with cell adhesion molecules, and with several signaling molecules to regulate cell morphology and motility. Expression of the protein is upregulated by gene amplification in two gastric cancer c…
ENSG00000169896	Kupffer Cell	ITGAM	Integrin, alpha M (complement component 3 receptor 3 subunit)	1.8	This gene encodes the integrin alpha M chain. Integrins are heterodimeric integral membrane proteins composed of an alpha chain and a beta chain. This I-domain containing alpha integrin combines with the beta 2 chain (ITGB2) to form a leukocyte-specific integrin referred to as macrophage receptor 1 ('Mac-1'), or inactivated-C3b (iC3b) receptor 3 ('CR3'). The alpha M beta 2 integrin is important i…
ENSG00000160255	Kupffer Cell	ITGB2	Integrin, beta 2 (complement component 3 receptor 3 and 4 subunit)	11.5	This gene encodes an integrin beta chain, which combines with multiple different alpha chains to form different integrin heterodimers. Integrins are integral cell-surface proteins that participate in cell adhesion as well as cell-surface mediated signalling. The encoded protein plays an important role in immune response and defects in this gene cause leukocyte adhesion deficiency. Alternative spl…
ENSG00000114166	Kupffer Cell	KAT2B	K(lysine) acetyltransferase 2B	11.8	CBP and p300 are large nuclear proteins that bind to many sequence-specific factors involved in cell growth and/or differentiation, including c-jun and the adenoviral oncoprotein E1A. The protein encoded by this gene associates with p300/CBP. It has in vitro and in vivo binding activity with CBP and p300, and competes with E1A for binding sites in p300/CBP. It has histone acetyl transferase activ…
ENSG00000156113	Kupffer Cell	KCNMA1	Potassium large conductance calcium-activated channel, subfamily M, alpha member 1	3.1	MaxiK channels are large conductance, voltage and calcium-sensitive potassium channels which are fundamental to the control of smooth muscle tone and neuronal excitability. MaxiK channels can be formed by 2 subunits: the pore-forming alpha subunit, which is the product of this gene, and the modulatory beta subunit. Intracellular calcium regulates the physical association between the alpha and bet…
ENSG00000174718	Kupffer Cell	KIAA1551	KIAA1551	11.1
ENSG00000143768	Kupffer Cell	LEFTY2	Left-right determination factor 2	0	This gene encodes a member of the TGF-beta family of proteins. The encoded protein is secreted and plays a role in left-right asymmetry determination of organ systems during development. The protein may also play a role in endometrial bleeding. Mutations in this gene have been associated with left-right axis malformations, particularly in the heart and lungs. Some types of infertility have been a…
ENSG00000105609	Kupffer Cell	LILRB5	Leukocyte immunoglobulin-like receptor, subfamily B (with TM and ITIM domains), member 5	4.1	This gene is a member of the leukocyte immunoglobulin-like receptor (LIR) family, which is found in a gene cluster at chromosomal region 19q13.4. The encoded protein belongs to the subfamily B class of LIR receptors which contain two or four extracellular immunoglobulin domains, a transmembrane domain, and two to four cytoplasmic immunoreceptor tyrosine-based inhibitory motifs (ITIMs). Several ot…
ENSG00000107798	Kupffer Cell	LIPA	Lipase A, lysosomal acid, cholesterol esterase	73.8	This gene encodes lipase A, the lysosomal acid lipase (also known as cholesterol ester hydrolase). This enzyme functions in the lysosome to catalyze the hydrolysis of cholesteryl esters and triglycerides. Mutations in this gene can result in Wolman disease and cholesteryl ester storage disease. Alternatively spliced transcript variants have been found for this gene. [provided by RefSeq, Jan 2014]
ENSG00000166035	Kupffer Cell	LIPC	Lipase, hepatic	95	LIPC encodes hepatic triglyceride lipase, which is expressed in liver. LIPC has the dual functions of triglyceride hydrolase and ligand/bridging factor for receptor-mediated lipoprotein uptake. [provided by RefSeq, Jul 2008]
ENSG00000177363	Kupffer Cell	LRRN4CL	LRRN4 C-terminal like	0
ENSG00000111144	Kupffer Cell	LTA4H	Leukotriene A4 hydrolase	14
ENSG00000090006	Kupffer Cell	LTBP4	Latent transforming growth factor beta binding protein 4	11.5	The protein encoded by this gene binds transforming growth factor beta (TGFB) as it is secreted and targeted to the extracellular matrix. TGFB is biologically latent after secretion and insertion into the extracellular matrix, and sheds TGFB and other proteins upon activation. Defects in this gene may be a cause of cutis laxa and severe pulmonary, gastrointestinal, and urinary abnormalities. Thre…
ENSG00000112799	Kupffer Cell	LY86	Lymphocyte antigen 86	2.6
ENSG00000189221	Kupffer Cell	MAOA	Monoamine oxidase A	40.9	This gene is one of two neighboring gene family members that encode mitochondrial enzymes which catalyze the oxidative deamination of amines, such as dopamine, norepinephrine, and serotonin. Mutation of this gene results in Brunner syndrome. This gene has also been associated with a variety of other psychiatric disorders, including antisocial behavior. Alternatively spliced transcript variants en…
ENSG00000168175	Kupffer Cell	MAPK1IP1L	Mitogen-activated protein kinase 1 interacting protein 1-like	9.6
ENSG00000019169	Kupffer Cell	MARCO	Macrophage receptor with collagenous structure	34.7	The protein encoded by this gene is a member of the class A scavenger receptor family and is part of the innate antimicrobial immune system. The protein may bind both Gram-negative and Gram-positive bacteria via an extracellular, C-terminal, scavenger receptor cysteine-rich (SRCR) domain. In addition to short cytoplasmic and transmembrane domains, there is an extracellular spacer domain and a lon…
ENSG00000065833	Kupffer Cell	ME1	Malic enzyme 1, NADP(+)-dependent, cytosolic	3.9	This gene encodes a cytosolic, NADP-dependent enzyme that generates NADPH for fatty acid biosynthesis. The activity of this enzyme, the reversible oxidative decarboxylation of malate, links the glycolytic and citric acid cycles. The regulation of expression for this gene is complex. Increased expression can result from elevated levels of thyroid hormones or by higher proportions of carbohydrates …
ENSG00000082212	Kupffer Cell	ME2	Malic enzyme 2, NAD(+)-dependent, mitochondrial	5.9	This gene encodes a mitochondrial NAD-dependent malic enzyme, a homotetrameric protein, that catalyzes the oxidative decarboxylation of malate to pyruvate. It had previously been weakly linked to a syndrome known as Friedreich ataxia that has since been shown to be the result of mutation in a completely different gene. Certain single-nucleotide polymorphism haplotypes of this gene have been shown…
ENSG00000123066	Kupffer Cell	MED13L	Mediator complex subunit 13-like	2.8	The protein encoded by this gene is a subunit of the Mediator complex, a large complex of proteins that functions as a transcriptional coactivator for most RNA polymerase II-transcribed genes. The encoded protein is involved in early development of the heart and brain. Defects in this gene are a cause of transposition of the great arteries, dextro-looped (DTGA).[provided by RefSeq, Jul 2010]
ENSG00000165819	Kupffer Cell	METTL3	Methyltransferase like 3	3.7	This gene encodes the 70 kDa subunit of MT-A which is part of N6-adenosine-methyltransferase. This enzyme is involved in the posttranscriptional methylation of internal adenosine residues in eukaryotic mRNAs, forming N6-methyladenosine. [provided by RefSeq, Jul 2008]
ENSG00000132763	Kupffer Cell	MMACHC	Methylmalonic aciduria (cobalamin deficiency) cblC type, with homocystinuria	7.1	The exact function of the protein encoded by this gene is not known, however, its C-terminal region shows similarity to TonB, a bacterial protein involved in energy transduction for cobalamin (vitamin B12) uptake. Hence, it is postulated that this protein may have a role in the binding and intracellular trafficking of cobalamin. Mutations in this gene are associated with methylmalonic aciduria an…
ENSG00000149968	Kupffer Cell	MMP3	Matrix metallopeptidase 3 (stromelysin 1, progelatinase)	0	Proteins of the matrix metalloproteinase (MMP) family are involved in the breakdown of extracellular matrix in normal physiological processes, such as embryonic development, reproduction, and tissue remodeling, as well as in disease processes, such as arthritis and metastasis. Most MMP's are secreted as inactive proproteins which are activated when cleaved by extracellular proteinases. This gene …
ENSG00000183748	Kupffer Cell	MRC1L1	CDNA FLJ56855, highly similar to Macrophage mannose receptor 1
ENSG00000144029	Kupffer Cell	MRPS5	Mitochondrial ribosomal protein S5	20.2	Mammalian mitochondrial ribosomal proteins are encoded by nuclear genes and help in protein synthesis within the mitochondrion. Mitochondrial ribosomes (mitoribosomes) consist of a small 28S subunit and a large 39S subunit. They have an estimated 75% protein to rRNA composition compared to prokaryotic ribosomes, where this ratio is reversed. Another difference between mammalian mitoribosomes and …
ENSG00000038945	Kupffer Cell	MSR1	Macrophage scavenger receptor 1	9.4	This gene encodes the class A macrophage scavenger receptors, which include three different types (1, 2, 3) generated by alternative splicing of this gene. These receptors or isoforms are macrophage-specific trimeric integral membrane glycoproteins and have been implicated in many macrophage-associated physiological and pathological processes including atherosclerosis, Alzheimer's disease, and ho…
ENSG00000164078	Kupffer Cell	MST1R	Macrophage stimulating 1 receptor (c-met-related tyrosine kinase)	0	This gene encodes a cell surface receptor for macrophage-stimulating protein (MSP) with tyrosine kinase activity. The mature form of this protein is a heterodimer of disulfide-linked alpha and beta subunits, generated by proteolytic cleavage of a single-chain precursor. The beta subunit undergoes tyrosine phosphorylation upon stimulation by MSP. This protein is expressed on the ciliated epithelia…
ENSG00000145949	Kupffer Cell	MYLK4	Myosin light chain kinase family, member 4	0.1
ENSG00000137497	Kupffer Cell	NUMA1	Nuclear mitotic apparatus protein 1	11.4	This gene encodes a large protein that forms a structural component of the nuclear matrix. The encoded protein interacts with microtubules and plays a role in the formation and organization of the mitotic spindle during cell division. Chromosomal translocation of this gene with the RARA (retinoic acid receptor, alpha) gene on chromosome 17 have been detected in patients with acute promyelocytic l…
ENSG00000176269	Kupffer Cell	OR4F21	Olfactory receptor, family 4, subfamily F, member 21	0	Olfactory receptors interact with odorant molecules in the nose, to initiate a neuronal response that triggers the perception of a smell. The olfactory receptor proteins are members of a large family of G-protein-coupled receptors (GPCR) arising from single coding-exon genes. Olfactory receptors share a 7-transmembrane domain structure with many neurotransmitter and hormone receptors and are resp…
ENSG00000230178	Kupffer Cell	OR4F3	Olfactory receptor, family 4, subfamily F, member 3	0	Olfactory receptors interact with odorant molecules in the nose, to initiate a neuronal response that triggers the perception of a smell. The olfactory receptor proteins are members of a large family of G-protein-coupled receptors (GPCR) arising from single coding-exon genes. Olfactory receptors share a 7-transmembrane domain structure with many neurotransmitter and hormone receptors and are resp…
ENSG00000115155	Kupffer Cell	OTOF	Otoferlin	0	Mutations in this gene are a cause of neurosensory nonsyndromic recessive deafness, DFNB9. The short form of the encoded protein has 3 C2 domains, a single carboxy-terminal transmembrane domain found also in the C. elegans spermatogenesis factor FER-1 and human dysferlin, while the long form has 6 C2 domains. The homology suggests that this protein may be involved in vesicle membrane fusion. Seve…
ENSG00000137819	Kupffer Cell	PAQR5	Progestin and adipoQ receptor family member V	0.4
ENSG00000115687	Kupffer Cell	PASK	PAS domain containing serine/threonine kinase	0.4	This gene encodes a member of the serine/threonine kinase family that contains two PAS domains. Expression of this gene is regulated by glucose, and the encoded protein plays a role in the regulation of insulin gene expression. Downregulation of this gene may play a role in type 2 diabetes. Alternatively spliced transcript variants encoding multiple isoforms have been observed for this gene. [pro…
ENSG00000189184	Kupffer Cell	PCDH18	Protocadherin 18	1.2	This gene belongs to the protocadherin gene family, a subfamily of the cadherin superfamily. This gene encodes a protein which contains 6 extracellular cadherin domains, a transmembrane domain and a cytoplasmic tail differing from those of the classical cadherins. Although its specific function is undetermined, the cadherin-related neuronal receptor is thought to play a role in the establishment …
ENSG00000187800	Kupffer Cell	PEAR1	Platelet endothelial aggregation receptor 1	0.3	PEAR1 is a platelet receptor that signals upon the formation of platelet-platelet contacts independent of platelet activation and secondary to platelet aggregation (Nanda et al., 2005 [PubMed 15851471]).[supplied by OMIM, Mar 2008]
ENSG00000073921	Kupffer Cell	PICALM	Phosphatidylinositol binding clathrin assembly protein	52.7	This gene encodes a clathrin assembly protein, which recruits clathrin and adaptor protein complex 2 (AP2) to cell membranes at sites of coated-pit formation and clathrin-vesicle assembly. The protein may be required to determine the amount of membrane to be recycled, possibly by regulating the size of the clathrin cage. The protein is involved in AP2-dependent clathrin-mediated endocytosis at th…
ENSG00000100564	Kupffer Cell	PIGH	Phosphatidylinositol glycan anchor biosynthesis, class H	5.5	This gene encodes an endoplasmic reticulum associated protein that is involved in glycosylphosphatidylinositol (GPI)-anchor biosynthesis. The GPI anchor is a glycolipid found on many blood cells and which serves to anchor proteins to the cell surface. The protein encoded by this gene is a subunit of the GPI N-acetylglucosaminyl (GlcNAc) transferase that transfers GlcNAc to phosphatidylinositol (P…
ENSG00000145675	Kupffer Cell	PIK3R1	Phosphoinositide-3-kinase, regulatory subunit 1 (alpha)	37.3	Phosphatidylinositol 3-kinase phosphorylates the inositol ring of phosphatidylinositol at the 3-prime position. The enzyme comprises a 110 kD catalytic subunit and a regulatory subunit of either 85, 55, or 50 kD. This gene encodes the 85 kD regulatory subunit. Phosphatidylinositol 3-kinase plays an important role in the metabolic actions of insulin, and a mutation in this gene has been associated…
ENSG00000167103	Kupffer Cell	PIP5KL1	Phosphatidylinositol-4-phosphate 5-kinase-like 1	0	PIP5KL1 is a phosphoinositide kinase-like protein that lacks intrinsic lipid kinase activity but associates with type I PIPKs (see PIP5K1A; MIM 603275) and may play a role in localization of PIPK activity (Chang et al., 2004 [PubMed 14701839]).[supplied by OMIM, Jun 2009]
ENSG00000137841	Kupffer Cell	PLCB2	Phospholipase C, beta 2	1.8
ENSG00000105223	Kupffer Cell	PLD3	Phospholipase D family, member 3	41.7	This gene encodes a member of the phospholipase D (PLD) family of enzymes that catalyze the hydrolysis of membrane phospholipids. The encoded protein is a single-pass type II membrane protein and contains two PLD phosphodiesterase domains. This protein influences processing of amyloid-beta precursor protein. Mutations in this gene are associated with Alzheimer disease risk. Alternatively spliced …
ENSG00000196834	Kupffer Cell	POTEI	POTE ankyrin domain family, member I	0
ENSG00000171960	Kupffer Cell	PPIH	Peptidylprolyl isomerase H (cyclophilin H)	8.3	The protein encoded by this gene is a member of the peptidyl-prolyl cis-trans isomerase (PPIase) family. PPIases catalyze the cis-trans isomerization of proline imidic peptide bonds in oligopeptides and accelerate the folding of proteins. This protein is a specific component of the complex that includes pre-mRNA processing factors PRPF3, PRPF4, and PRPF18, as well as U4/U5/U6 tri-snRNP. This prot…
ENSG00000137509	Kupffer Cell	PRCP	Prolylcarboxypeptidase (angiotensinase C)	44	The protein encoded by this gene is a lysosomal prolylcarboxypeptidase, which cleaves C-terminal amino acids linked to proline in peptides such as angiotension II, III and des-Arg9-bradykinin. The cleavage occurs at acidic pH, but the enzyme activity is retained with some substrates at neutral pH. This enzyme has been shown to be an activator of the cell matrix-associated prekallikrein. The impor…
ENSG00000180228	Kupffer Cell	PRKRA	Protein kinase, interferon-inducible double stranded RNA dependent activator	7.4	This gene encodes a protein kinase activated by double-stranded RNA which mediates the effects of interferon in response to viral infection. Mutations in this gene have been associated with dystonia. Alternative splicing results in multiple transcript variants. [provided by RefSeq, Nov 2008]
ENSG00000243130	Kupffer Cell	PSG11	Pregnancy specific beta-1-glycoprotein 11	0	The human pregnancy-specific glycoproteins (PSGs) are a group of molecules that are mainly produced by the placental syncytiotrophoblasts during pregnancy. PSGs comprise a subgroup of the carcinoembryonic antigen (CEA) family, which belongs to the immunoglobulin superfamily. For additional general information about the PSG gene family, see PSG1 (MIM 176390).[supplied by OMIM, Oct 2009]
ENSG00000125650	Kupffer Cell	PSPN	Persephin	0.1	The protein encoded by this gene is a neurotrophic factor, belonging to the GDNF family. Neurotrophic factors are important for the proper development and maintenance of the nervous system. These factors promote neuronal survival and can prevent the neuronal degeneration associated with injury, toxin exposure, or neurodegenerative disease. The encoded protein has amino acid similarity to its othe…
ENSG00000185920	Kupffer Cell	PTCH1	Patched 1	1	This gene encodes a member of the patched gene family. The encoded protein is the receptor for sonic hedgehog, a secreted molecule implicated in the formation of embryonic structures and in tumorigenesis, as well as the desert hedgehog and indian hedgehog proteins. This gene functions as a tumor suppressor. Mutations of this gene have been associated with basal cell nevus syndrome, esophageal squ…
ENSG00000171522	Kupffer Cell	PTGER4	Prostaglandin E receptor 4 (subtype EP4)	1.5	The protein encoded by this gene is a member of the G-protein coupled receptor family. This protein is one of four receptors identified for prostaglandin E2 (PGE2). This receptor can activate T-cell factor signaling. It has been shown to mediate PGE2 induced expression of early growth response 1 (EGR1), regulate the level and stability of cyclooxygenase-2 mRNA, and lead to the phosphorylation of …
ENSG00000196396	Kupffer Cell	PTPN1	Protein tyrosine phosphatase, non-receptor type 1	6.9	The protein encoded by this gene is the founding member of the protein tyrosine phosphatase (PTP) family, which was isolated and identified based on its enzymatic activity and amino acid sequence. PTPs catalyze the hydrolysis of the phosphate monoesters specifically on tyrosine residues. Members of the PTP family share a highly conserved catalytic motif, which is essential for the catalytic activ…
ENSG00000134242	Kupffer Cell	PTPN22	Protein tyrosine phosphatase, non-receptor type 22 (lymphoid)	0.5	This gene encodes of member of the non-receptor class 4 subfamily of the protein-tyrosine phosphatase family. The encoded protein is a lymphoid-specific intracellular phosphatase that associates with the molecular adapter protein CBL and may be involved in regulating CBL function in the T-cell receptor signaling pathway. Mutations in this gene may be associated with a range of autoimmune disorder…
ENSG00000132334	Kupffer Cell	PTPRE	Protein tyrosine phosphatase, receptor type, E	2.2	The protein encoded by this gene is a member of the protein tyrosine phosphatase (PTP) family. PTPs are known to be signaling molecules that regulate a variety of cellular processes including cell growth, differentiation, mitotic cycle, and oncogenic transformation. Two alternatively spliced transcript variants of this gene have been reported, one of which encodes a receptor-type PTP that possess…
ENSG00000103490	Kupffer Cell	PYCARD	PYD and CARD domain containing	3.2	This gene encodes an adaptor protein that is composed of two protein-protein interaction domains: a N-terminal PYRIN-PAAD-DAPIN domain (PYD) and a C-terminal caspase-recruitment domain (CARD). The PYD and CARD domains are members of the six-helix bundle death domain-fold superfamily that mediates assembly of large signaling complexes in the inflammatory and apoptotic signaling pathways via the ac…
ENSG00000118508	Kupffer Cell	RAB32	RAB32, member RAS oncogene family	18.9	Small GTP-binding proteins of the RAB family, such as RAB32, play essential roles in vesicle and granule targeting (Bao et al., 2002 [PubMed 11784320]).[supplied by OMIM, Aug 2009]
ENSG00000108774	Kupffer Cell	RAB5C	RAB5C, member RAS oncogene family	34.6	Members of the Rab protein family are small GTPases of the Ras superfamily that are thought to ensure fidelity in the process of docking and/or fusion of vesicles with their correct acceptor compartment (Han et al., 1996 [PubMed 8646882]).[supplied by OMIM, Nov 2010]
ENSG00000123595	Kupffer Cell	RAB9A	RAB9A, member RAS oncogene family	9.2
ENSG00000173039	Kupffer Cell	RELA	V-rel avian reticuloendotheliosis viral oncogene homolog A	14.5	NF-kappa-B is a ubiquitous transcription factor involved in several biological processes. It is held in the cytoplasm in an inactive state by specific inhibitors. Upon degradation of the inhibitor, NF-kappa-B moves to the nucleus and activates transcription of specific genes. NF-kappa-B is composed of NFKB1 or NFKB2 bound to either REL, RELA, or RELB. The most abundant form of NF-kappa-B is NFKB1…
ENSG00000102032	Kupffer Cell	RENBP	Renin binding protein	2.5	The gene product inhibits renin activity by forming a dimer with renin, a complex known as high molecular weight renin. The encoded protein contains a leucine zipper domain, which is essential for its dimerization with renin. The gene product can catalyze the interconversion of N-acetylglucosamine to N-acetylmannosamine, indicating that it is a GlcNAc 2-epimerase. Transcript variants utilizing al…
ENSG00000106615	Kupffer Cell	RHEB	Ras homolog enriched in brain	8.5	This gene is a member of the small GTPase superfamily and encodes a lipid-anchored, cell membrane protein with five repeats of the RAS-related GTP-binding region. This protein is vital in regulation of growth and cell cycle progression due to its role in the insulin/TOR/S6K signaling pathway. The protein has GTPase activity and shuttles between a GDP-bound form and a GTP-bound form, and farnesyla…
ENSG00000167705	Kupffer Cell	RILP	Rab interacting lysosomal protein	4.3	This gene encodes a lysosomal protein that interacts with RAB7, a small GTPase that controls transport to endocytic degradative compartments. Studies using mutant forms of the two proteins suggest that this protein represents a downstream effector for RAB7, and both proteins act together in the regulation of late endocytic traffic. A unique region of this protein has also been shown to be involve…
ENSG00000165799	Kupffer Cell	RNASE7	Ribonuclease, RNase A family, 7	0	The protein encoded by this gene belongs to the pancreatic ribonuclease family, a subset of the ribonuclease A superfamily. The protein has broad-spectrum antimicrobial activity against bacteria and fungi. [provided by RefSeq, Oct 2014]
ENSG00000026297	Kupffer Cell	RNASET2	Ribonuclease T2	18.5	This ribonuclease gene is a novel member of the Rh/T2/S-glycoprotein class of extracellular ribonucleases. It is a single copy gene that maps to 6q27, a region associated with human malignancies and chromosomal rearrangement. [provided by RefSeq, Jul 2008]
ENSG00000013561	Kupffer Cell	RNF14	Ring finger protein 14	21	The protein encoded by this gene contains a RING zinc finger, a motif known to be involved in protein-protein interactions. This protein interacts with androgen receptor (AR) and may function as a coactivator that induces AR target gene expression in prostate. A dominant negative mutant of this gene has been demonstrated to inhibit the AR-mediated growth of prostate cancer. This protein also inte…
ENSG00000116514	Kupffer Cell	RNF19B	Ring finger protein 19B	4.8	This gene encodes a multi-pass membrane protein containing two RING-type and one IBR-type zinc finger motifs. The encoded protin is an E3 ubiquitin-protein ligase that plays a role in the cytotoxic effects of natural killer (NK) cells. Alternative splicing results in multiple transcript variants. There are pseudogenes for this gene on chromosomes X and Y in a possible pseudoautosomal region. [pro…
ENSG00000185008	Kupffer Cell	ROBO2	Roundabout, axon guidance receptor, homolog 2 (Drosophila)	0.5	The protein encoded by this gene belongs to the ROBO family, part of the immunoglobulin superfamily of proteins that are highly conserved from fly to human. The encoded protein is a transmembrane receptor for the slit homolog 2 protein and functions in axon guidance and cell migration. Mutations in this gene are associated with vesicoureteral reflux, characterized by the backward flow of urine fr…
ENSG00000239665	Kupffer Cell	RP11-295P9.3	Uncharacterized protein	0
ENSG00000164967	Kupffer Cell	RPP25L	Ribonuclease P/MRP 25kDa subunit-like	11.5	This gene encodes a protein that appears to belong to a family of evolutionarily related proteins (DUF78), that may share one or more domains in common. Members of this family are small archaebacterial proteins with no known function. Alternative splicing has been observed at this locus and two variants, both encoding the same protein, have been identified. [provided by RefSeq, Jul 2008]
ENSG00000155876	Kupffer Cell	RRAGA	Ras-related GTP binding A	25
ENSG00000146374	Kupffer Cell	RSPO3	R-spondin 3	3.4	This gene belongs to the R-spondin family. The encoded protein plays a role in the regulation of Wnt (wingless-type MMTV integration site family)/beta-catenin and Wnt/planar cell polarity (PCP) signaling pathways, which are involved in development, cell growth and disease pathogenesis. Genome-wide association studies suggest a correlation of this gene with bone mineral density and risk of fractur…
ENSG00000163191	Kupffer Cell	S100A11	S100 calcium binding protein A11	43	The protein encoded by this gene is a member of the S100 family of proteins containing 2 EF-hand calcium-binding motifs. S100 proteins are localized in the cytoplasm and/or nucleus of a wide range of cells, and involved in the regulation of a number of cellular processes such as cell cycle progression and differentiation. S100 genes include at least 13 members which are located as a cluster on ch…
ENSG00000177409	Kupffer Cell	SAMD9L	Sterile alpha motif domain containing 9-like	1.8
ENSG00000101347	Kupffer Cell	SAMHD1	SAM domain and HD domain 1	10	This gene may play a role in regulation of the innate immune response. The encoded protein is upregulated in response to viral infection and may be involved in mediation of tumor necrosis factor-alpha proinflammatory responses. Mutations in this gene have been associated with Aicardi-Goutieres syndrome. [provided by RefSeq, Mar 2010]
ENSG00000140497	Kupffer Cell	SCAMP2	Secretory carrier membrane protein 2	10	This gene product belongs to the SCAMP family of proteins which are secretory carrier membrane proteins. They function as carriers to the cell surface in post-golgi recycling pathways. Different family members are highly related products of distinct genes, and are usually expressed together. These findings suggest that the SCAMPs may function at the same site during vesicular transport rather tha…
ENSG00000111319	Kupffer Cell	SCNN1A	Sodium channel, non-voltage-gated 1 alpha subunit	0.8	Nonvoltage-gated, amiloride-sensitive, sodium channels control fluid and electrolyte transport across epithelia in many organs. These channels are heteromeric complexes consisting of 3 subunits: alpha, beta, and gamma. This gene encodes the alpha subunit, and mutations in this gene have been associated with pseudohypoaldosteronism type 1 (PHA1), a rare salt wasting disease resulting from target o…
ENSG00000175356	Kupffer Cell	SCUBE2	Signal peptide, CUB domain, EGF-like 2	0.3
ENSG00000140264	Kupffer Cell	SERF2	Small EDRK-rich factor 2	236.5
ENSG00000196136	Kupffer Cell	SERPINA3	Serpin peptidase inhibitor, clade A (alpha-1 antiproteinase, antitrypsin), member 3	407.3	The protein encoded by this gene is a plasma protease inhibitor and member of the serine protease inhibitor class. Polymorphisms in this protein appear to be tissue specific and influence protease targeting. Variations in this protein's sequence have been implicated in Alzheimer's disease, and deficiency of this protein has been associated with liver disease. Mutations have been identified in pat…
ENSG00000183576	Kupffer Cell	SETD3	SET domain containing 3	17
ENSG00000088827	Kupffer Cell	SIGLEC1	Sialic acid binding Ig-like lectin 1, sialoadhesin	2.4	This gene encodes a member of the immunoglobulin superfamily. The encoded protein is a lectin-like adhesion molecule that binds glycoconjugate ligands on cell surfaces in a sialic acid-dependent manner. It is a type I transmembrane protein expressed only by a subpopulation of macrophages and is involved in mediating cell-cell interactions. Alternative splicing produces a transcript variant encodi…
ENSG00000142512	Kupffer Cell	SIGLEC10	Sialic acid binding Ig-like lectin 10	1.3	SIGLECs are members of the immunoglobulin superfamily that are expressed on the cell surface. Most SIGLECs have 1 or more cytoplasmic immune receptor tyrosine-based inhibitory motifs, or ITIMs. SIGLECs are typically expressed on cells of the innate immune system, with the exception of the B-cell expressed SIGLEC6 (MIM 604405).[supplied by OMIM, Jul 2002]
ENSG00000005020	Kupffer Cell	SKAP2	Src kinase associated phosphoprotein 2	4.7	The protein encoded by this gene shares homology with Src kinase-associated phosphoprotein 1, and is a substrate of Src family kinases. It is an adaptor protein that is thought to play an essential role in the Src signaling pathway, and in regulating proper activation of the immune system. This protein contains an amino terminal coiled-coil domain for self-dimerization, a plecskstrin homology (PH…
ENSG00000106688	Kupffer Cell	SLC1A1	Solute carrier family 1 (neuronal/epithelial high affinity glutamate transporter, system Xag), member 1	11.6	This gene encodes a member of the high-affinity glutamate transporters that play an essential role in transporting glutamate across plasma membranes. In brain, these transporters are crucial in terminating the postsynaptic action of the neurotransmitter glutamate, and in maintaining extracellular glutamate concentrations below neurotoxic levels. This transporter also transports aspartate, and mut…
ENSG00000158014	Kupffer Cell	SLC30A2	Solute carrier family 30 (zinc transporter), member 2	0
ENSG00000113073	Kupffer Cell	SLC4A9	Solute carrier family 4, sodium bicarbonate cotransporter, member 9	0	The protein encoded by this gene is a membrane protein involved in anion exchange. Expression of this gene is mostly limited to the kidney. Several transcript variants encoding different isoforms have been found for this gene. [provided by RefSeq, May 2012]
ENSG00000116698	Kupffer Cell	SMG7	SMG7 nonsense mediated mRNA decay factor	8.3	This gene encodes a protein that is essential for nonsense-mediated mRNA decay (NMD); a process whereby transcripts with premature termination codons are targeted for rapid degradation by a mRNA decay complex. The mRNA decay complex consists, in part, of this protein along with proteins SMG5 and UPF1. The N-terminal domain of this protein is thought to mediate its association with SMG5 or UPF1 wh…
ENSG00000128602	Kupffer Cell	SMO	Smoothened, frizzled family receptor	4.2	The protein encoded by this gene is a G protein-coupled receptor that interacts with the patched protein, a receptor for hedgehog proteins. The encoded protein tranduces signals to other proteins after activation by a hedgehog protein/patched protein complex. [provided by RefSeq, Jul 2010]
ENSG00000091482	Kupffer Cell	SMPX	Small muscle protein, X-linked	0.1	This gene encodes a small protein that has no known functional domains. Mutations in this gene are a cause of X-linked deafness-4, and the encoded protein may play a role in the maintenance of inner ear cells subjected to mechanical stress. Alternatively spliced transcript variants have been observed for this gene. [provided by RefSeq, Dec 2011]
ENSG00000057252	Kupffer Cell	SOAT1	Sterol O-acyltransferase 1	5.2	The protein encoded by this gene belongs to the acyltransferase family. It is located in the endoplasmic reticulum, and catalyzes the formation of fatty acid-cholesterol esters. This gene has been implicated in the formation of beta-amyloid and atherosclerotic plaques by controlling the equilibrium between free cholesterol and cytoplasmic cholesteryl esters. Alternatively spliced transcript varia…
ENSG00000113140	Kupffer Cell	SPARC	Secreted protein, acidic, cysteine-rich (osteonectin)	77.2	This gene encodes a cysteine-rich acidic matrix-associated protein. The encoded protein is required for the collagen in bone to become calcified but is also involved in extracellular matrix synthesis and promotion of changes to cell shape. The gene product has been associated with tumor suppression but has also been correlated with metastasis based on changes to cell shape which can promote tumor…
ENSG00000021574	Kupffer Cell	SPAST	Spastin	3.3	This gene encodes a member of the AAA (ATPases associated with a variety of cellular activities) protein family. Members of this protein family share an ATPase domain and have roles in diverse cellular processes including membrane trafficking, intracellular motility, organelle biogenesis, protein folding, and proteolysis. The encoded ATPase may be involved in the assembly or function of nuclear p…
ENSG00000145545	Kupffer Cell	SRD5A1	Steroid-5-alpha-reductase, alpha polypeptide 1 (3-oxo-5 alpha-steroid delta 4-dehydrogenase alpha 1)	15.9	Steroid 5-alpha-reductase (EC 1.3.99.5) catalyzes the conversion of testosterone into the more potent androgen, dihydrotestosterone (DHT). Also see SRD5A2 (MIM 607306).[supplied by OMIM, Mar 2008]
ENSG00000010327	Kupffer Cell	STAB1	Stabilin 1	17.8	This gene encodes a large, transmembrane receptor protein which may function in angiogenesis, lymphocyte homing, cell adhesion, or receptor scavenging. The protein contains 7 fasciclin, 16 epidermal growth factor (EGF)-like, and 2 laminin-type EGF-like domains as well as a C-type lectin-like hyaluronan-binding Link module. The protein is primarily expressed on sinusoidal endothelial cells of live…
ENSG00000136011	Kupffer Cell	STAB2	Stabilin 2	5.8	This gene encodes a large, transmembrane receptor protein which may function in angiogenesis, lymphocyte homing, cell adhesion, or receptor scavenging. The protein contains 7 fasciclin, 15 epidermal growth factor (EGF)-like, and 2 laminin-type EGF-like domains as well as a C-type lectin-like hyaluronan-binding Link module. The protein is primarily expressed on sinusoidal endothelial cells of live…
ENSG00000072786	Kupffer Cell	STK10	Serine/threonine kinase 10	2.4	This gene encodes a member of the Ste20 family of serine/threonine protein kinases, and is similar to several known polo-like kinase kinases. The protein can associate with and phosphorylate polo-like kinase 1, and overexpression of a kinase-dead version of the protein interferes with normal cell cycle progression. The kinase can also negatively regulate interleukin 2 expression in T-cells via th…
ENSG00000135111	Kupffer Cell	TBX3	T-box 3	7.2	This gene is a member of a phylogenetically conserved family of genes that share a common DNA-binding domain, the T-box. T-box genes encode transcription factors involved in the regulation of developmental processes. This protein is a transcriptional repressor and is thought to play a role in the anterior/posterior axis of the tetrapod forelimb. Mutations in this gene cause ulnar-mammary syndrome…
ENSG00000059377	Kupffer Cell	TBXAS1	Thromboxane A synthase 1 (platelet)	3.8	This gene encodes a member of the cytochrome P450 superfamily of enzymes. The cytochrome P450 proteins are monooxygenases which catalyze many reactions involved in drug metabolism and synthesis of cholesterol, steroids and other lipids. However, this protein is considered a member of the cytochrome P450 superfamily on the basis of sequence similarity rather than functional similarity. This endopl…
ENSG00000134827	Kupffer Cell	TCN1	Transcobalamin I (vitamin B12 binding protein, R binder family)	0.1	This gene encodes a member of the vitamin B12-binding protein family. This family of proteins, alternatively referred to as R binders, is expressed in various tissues and secretions. This protein is a major constituent of secondary granules in neutrophils and facilitates the transport of cobalamin into cells. [provided by RefSeq, Jul 2008]
ENSG00000177426	Kupffer Cell	TGIF1	TGFB-induced factor homeobox 1	18.2	The protein encoded by this gene is a member of the three-amino acid loop extension (TALE) superclass of atypical homeodomains. TALE homeobox proteins are highly conserved transcription regulators. This particular homeodomain binds to a previously characterized retinoid X receptor responsive element from the cellular retinol-binding protein II promoter. In addition to its role in inhibiting 9-cis…
ENSG00000145850	Kupffer Cell	TIMD4	T-cell immunoglobulin and mucin domain containing 4	4.1
ENSG00000178821	Kupffer Cell	TMEM52	Transmembrane protein 52	1.8
ENSG00000205542	Kupffer Cell	TMSB4X	Thymosin beta 4, X-linked	475.1	This gene encodes an actin sequestering protein which plays a role in regulation of actin polymerization. The protein is also involved in cell proliferation, migration, and differentiation. This gene escapes X inactivation and has a homolog on chromosome Y. [provided by RefSeq, Jul 2008]
ENSG00000178462	Kupffer Cell	TUBAL3	Tubulin, alpha-like 3	0
ENSG00000131462	Kupffer Cell	TUBG1	Tubulin, gamma 1	5.8	This gene encodes a member of the tubulin superfamily. The encoded protein localizes to the centrosome where it binds to microtubules as part of a complex referred to as the gamma-tubulin ring complex. The protein mediates microtubule nucleation and is required for microtubule formation and progression of the cell cycle. A pseudogene of this gene is found on chromosome 7. [provided by RefSeq, Jan…
ENSG00000132388	Kupffer Cell	UBE2G1	Ubiquitin-conjugating enzyme E2G 1	12.2	The modification of proteins with ubiquitin is an important cellular mechanism for targeting abnormal or short-lived proteins for degradation. Ubiquitination involves at least three classes of enzymes: ubiquitin-activating enzymes, or E1s, ubiquitin-conjugating enzymes, or E2s, and ubiquitin-protein ligases, or E3s. This gene encodes a member of the E2 ubiquitin-conjugating enzyme family and cata…
ENSG00000077152	Kupffer Cell	UBE2T	Ubiquitin-conjugating enzyme E2T (putative)	1.6	The covalent conjugation of ubiquitin to proteins regulates diverse cellular pathways and proteins. Ubiquitin is transferred to a target protein through a concerted action of a ubiquitin-activating enzyme (E1), a ubiquitin-conjugating enzyme (E2), such as UBE2T, and a ubiquitin ligase (E3) (Machida et al., 2006 [PubMed 16916645]).[supplied by OMIM, Mar 2008]
ENSG00000198276	Kupffer Cell	UCKL1	Uridine-cytidine kinase 1-like 1	6.1
ENSG00000114638	Kupffer Cell	UPK1B	Uroplakin 1B	0	The protein encoded by this gene is a member of the transmembrane 4 superfamily, also known as the tetraspanin family. Most of these members are cell-surface proteins that are characterized by the presence of four hydrophobic domains. The proteins mediate signal transduction events that play a role in the regulation of cell development, activation, growth and motility. This encoded protein is fou…
ENSG00000249811	Kupffer Cell	USP17L21	Ubiquitin specific peptidase 17-like family member 21	0
ENSG00000085433	Kupffer Cell	WDR47	WD repeat domain 47	1.2
ENSG00000176871	Kupffer Cell	WSB2	WD repeat and SOCS box containing 2	11.1	This gene encodes a member of the WD-protein subfamily. The encoded protein contains five WD-repeats spanning most of the protein and an SOCS box in the C-terminus. The SOCS box may act as a bridge between specific substrate-binding domains and E3 ubiquitin protein ligases. Three transcript variants encoding different isoforms have been found for this gene. [provided by RefSeq, Jun 2013]
ENSG00000164684	Kupffer Cell	ZNF704	Zinc finger protein 704	1.8
ENSG00000168612	Kupffer Cell	ZSWIM1	Zinc finger, SWIM-type containing 1	0.9

## Sheet: Table S-2
ENSG ID	Expression Pattern	Gene Symbol	Gene Name	FPKM	Info
ENSG00000122545	Endothelial Cell	SEP7	Septin 7	21.5	This gene encodes a protein that is highly similar to the CDC10 protein of Saccharomyces cerevisiae. The protein also shares similarity with Diff 6 of Drosophila and with H5 of mouse. Each of these similar proteins, including the yeast CDC10, contains a GTP-binding motif. The yeast CDC10 protein is a structural component of the 10 nm filament which lies inside the cytoplasmic membrane and is esse…
ENSG00000186522	Endothelial Cell	SEP10	Septin 10	16.3	This gene encodes a member of the septin family of cytoskeletal proteins with GTPase activity. This protein localizes to the cytoplasm and nucleus and displays GTP-binding and GTPase activity. A pseudogene for this gene is located on chromosome 8. Alternative splicing results in multiple transcript variants. [provided by RefSeq, Apr 2012]
ENSG00000131269	Endothelial Cell	ABCB7	ATP-binding cassette, sub-family B (MDR/TAP), member 7	6.5	The membrane-associated protein encoded by this gene is a member of the superfamily of ATP-binding cassette (ABC) transporters. ABC proteins transport various molecules across extra- and intra-cellular membranes. ABC genes are divided into seven distinct subfamilies (ABC1, MDR/TAP, MRP, ALD, OABP, GCN20, White). This protein is a member of the MDR/TAP subfamily. Members of the MDR/TAP subfamily a…
ENSG00000110455	Endothelial Cell	ACCS	1-aminocyclopropane-1-carboxylate synthase homolog (Arabidopsis)(non-functional)	2.7
ENSG00000159640	Endothelial Cell	ACE	Angiotensin I converting enzyme	0.6	This gene encodes an enzyme involved in catalyzing the conversion of angiotensin I into a physiologically active peptide angiotensin II. Angiotensin II is a potent vasopressor and aldosterone-stimulating peptide that controls blood pressure and fluid-electrolyte balance. This enzyme plays a key role in the renin-angiotensin system. Many studies have associated the presence or absence of a 287 bp …
ENSG00000107796	Endothelial Cell	ACTA2	Actin, alpha 2, smooth muscle, aorta	53.8	The protein encoded by this gene belongs to the actin family of proteins, which are highly conserved proteins that play a role in cell motility, structure and integrity. Alpha, beta and gamma actin isoforms have been identified, with alpha actins being a major constituent of the contractile apparatus, while beta and gamma actins are involved in the regulation of cell motility. This actin is an al…
ENSG00000130402	Endothelial Cell	ACTN4	Actinin, alpha 4	36.1	Alpha actinins belong to the spectrin gene superfamily which represents a diverse group of cytoskeletal proteins, including the alpha and beta spectrins and dystrophins. Alpha actinin is an actin-binding protein with multiple roles in different cell types. In nonmuscle cells, the cytoskeletal isoform is found along microfilament bundles and adherens-type junctions, where it is involved in binding…
ENSG00000143199	Endothelial Cell	ADCY10	Adenylate cyclase 10 (soluble)	1.4	The protein encoded by this gene belongs to a distinct class of adenylyl cyclases that is soluble and insensitive to G protein or forskolin regulation. Activity of this protein is regulated by bicarbonate. Variation at this gene has been observed in patients with absorptive hypercalciuria. Alternatively spliced transcript variants encoding different isoforms have been observed. There is a pseudog…
ENSG00000181092	Endothelial Cell	ADIPOQ	Adiponectin, C1Q and collagen domain containing	0	This gene is expressed in adipose tissue exclusively. It encodes a protein with similarity to collagens X and VIII and complement factor C1q. The encoded protein circulates in the plasma and is involved with metabolic and hormonal processes. Mutations in this gene are associated with adiponectin deficiency. Multiple alternatively spliced variants, encoding the same protein, have been identified. …
ENSG00000144891	Endothelial Cell	AGTR1	Angiotensin II receptor, type 1	33.6	Angiotensin II is a potent vasopressor hormone and a primary regulator of aldosterone secretion. It is an important effector controlling blood pressure and volume in the cardiovascular system. It acts through at least two types of receptors. This gene encodes the type 1 receptor which is thought to mediate the major cardiovascular effects of angiotensin II. This gene may play a role in the genera…
ENSG00000185567	Endothelial Cell + Other Pattern	AHNAK2	AHNAK nucleoprotein 2	0.1
ENSG00000132746	Endothelial Cell	ALDH3B2	Aldehyde dehydrogenase 3 family, member B2	0	This gene encodes a member of the aldehyde dehydrogenase family, a group of isozymes that may play a major role in the detoxification of aldehydes generated by alcohol metabolism and lipid peroxidation. The gene of this particular family member is over 10 kb in length. The expression of these transcripts is restricted to the salivary gland among the human tissues examined. Alternate transcription…
ENSG00000172339	Endothelial Cell	ALG14	ALG14, UDP-N-acetylglucosaminyltransferase subunit	0.6	Asparagine (N)-glycosylation is an essential modification that regulates protein folding and stability. ALG13 and ALG14 (MIM 612866) constitute the UDP-GlcNAc transferase, which catalyzes a key step in endoplasmic reticulum N-linked glycosylation (Averbeck et al., 2007 [PubMed 17686769]).[supplied by OMIM, Jun 2009]
ENSG00000187689	Endothelial Cell	AMTN	Amelotin	0	The mineralized portions of teeth, the dentin and enamel, are formed by mesenchyme-derived odontoblasts and epithelium-derived ameloblasts, respectively. As ameloblasts differentiate, they deposit specific proteins necessary for enamel formation, including amelogenin (AMELX; MIM 300391), enamelin (ENAM; MIM 606585), and ameloblastin (AMBN; MIM 601259), in the organic enamel matrix. Amelotin is sp…
ENSG00000135046	Endothelial Cell + Other Pattern	ANXA1	Annexin A1	20.5	This gene encodes a membrane-localized protein that binds phospholipids. This protein inhibits phospholipase A2 and has anti-inflammatory activity. Loss of function or expression of this gene has been detected in multiple tumors. [provided by RefSeq, Dec 2014]
ENSG00000122359	Endothelial Cell + Other Pattern	ANXA11	Annexin A11	17.2	This gene encodes a member of the annexin family, a group of calcium-dependent phospholipid-binding proteins. Annexins have unique N-terminal domains and conserved C-terminal domains, which contain the calcium-dependent phospholipid-binding sites. The encoded protein is a 56-kD antigen recognized by sera from patients with various autoimmune diseases. Several transcript variants encoding two diff…
ENSG00000182718	Endothelial Cell + Other Pattern	ANXA2	Annexin A2	26	This gene encodes a member of the annexin family. Members of this calcium-dependent phospholipid-binding protein family play a role in the regulation of cellular growth and in signal transduction pathways. This protein functions as an autocrine factor which heightens osteoclast formation and bone resorption. This gene has three pseudogenes located on chromosomes 4, 9 and 10, respectively. Multipl…
ENSG00000164111	Endothelial Cell + Other Pattern	ANXA5	Annexin A5	62.1	The protein encoded by this gene belongs to the annexin family of calcium-dependent phospholipid binding proteins some of which have been implicated in membrane-related events along exocytotic and endocytotic pathways. Annexin 5 is a phospholipase A2 and protein kinase C inhibitory protein with calcium channel activity and a potential role in cellular signal transduction, inflammation, growth and…
ENSG00000131471	Endothelial Cell	AOC3	Amine oxidase, copper containing 3	8.4	This gene encodes a member of the semicarbazide-sensitive amine oxidase family. Copper amine oxidases catalyze the oxidative conversion of amines to aldehydes in the presence of copper and quinone cofactor. The encoded protein is localized to the cell surface, has adhesive properties as well as monoamine oxidase activity, and may be involved in leukocyte trafficking. Alterations in levels of the …
ENSG00000244509	Endothelial Cell	APOBEC3C	Apolipoprotein B mRNA editing enzyme, catalytic polypeptide-like 3C	2.2	This gene is a member of the cytidine deaminase gene family. It is one of seven related genes or pseudogenes found in a cluster thought to result from gene duplication, on chromosome 22. Members of the cluster encode proteins that are structurally and functionally related to the C to U RNA-editing cytidine deaminase APOBEC1. It is thought that the proteins may be RNA editing enzymes and have role…
ENSG00000130208	Endothelial Cell + Other Pattern	APOC1	Apolipoprotein C-I	9774.3	The protein encoded by this gene is a member of the apolipoprotein C1 family. This gene is expressed primarily in the liver, and it is activated when monocytes differentiate into macrophages. A pseudogene of this gene is located 4 kb downstream in the same orientation, on the same chromosome. This gene is mapped to chromosome 19, where it resides within a apolipoprotein gene cluster. Alternativel…
ENSG00000091583	Endothelial Cell + Other Pattern	APOH	Apolipoprotein H (beta-2-glycoprotein I)	5156.1	Apolipoprotein H has been implicated in a variety of physiologic pathways including lipoprotein metabolism, coagulation, and the production of antiphospholipid autoantibodies. APOH may be a required cofactor for anionic phospholipid binding by the antiphospholipid autoantibodies found in sera of many patients with lupus and primary antiphospholipid syndrome, but it does not seem to be required fo…
ENSG00000240583	Endothelial Cell	AQP1	Aquaporin 1 (Colton blood group)	8.8	Aquaporins are a family of small integral membrane proteins related to the major intrinsic protein (MIP or AQP0). This gene encodes an aquaporin which functions as a molecular water channel protein. It is a homotetramer with 6 bilayer spanning domains and N-glycosylation sites. The protein physically resembles channel proteins and is abundant in erythrocytes and renal tubes. The gene encoding thi…
ENSG00000076928	Endothelial Cell	ARHGEF1	Rho guanine nucleotide exchange factor (GEF) 1	5.4	Rho GTPases play a fundamental role in numerous cellular processes that are initiated by extracellular stimuli that work through G protein coupled receptors. The encoded protein may form complex with G proteins and stimulate Rho-dependent signals. Multiple alternatively spliced transcript variants have been found for this gene, but the full-length nature of some variants has not been defined. [pr…
ENSG00000163466	Endothelial Cell	ARPC2	Actin related protein 2/3 complex, subunit 2, 34kDa	46.1	This gene encodes one of seven subunits of the human Arp2/3 protein complex. The Arp2/3 protein complex has been implicated in the control of actin polymerization in cells and has been conserved through evolution. The exact role of the protein encoded by this gene, the p34 subunit, has yet to be determined. Two alternatively spliced variants have been characterized to date. Additional alternative…
ENSG00000137486	Endothelial Cell	ARRB1	Arrestin, beta 1	3.8	Members of arrestin/beta-arrestin protein family are thought to participate in agonist-mediated desensitization of G-protein-coupled receptors and cause specific dampening of cellular responses to stimuli such as hormones, neurotransmitters, or sensory signals. Arrestin beta 1 is a cytosolic protein and acts as a cofactor in the beta-adrenergic receptor kinase (BARK) mediated desensitization of b…
ENSG00000074370	Endothelial Cell	ATP2A3	ATPase, Ca++ transporting, ubiquitous	1	This gene encodes one of the SERCA Ca(2+)-ATPases, which are intracellular pumps located in the sarcoplasmic or endoplasmic reticula of muscle cells. This enzyme catalyzes the hydrolysis of ATP coupled with the translocation of calcium from the cytosol to the sarcoplasmic reticulum lumen, and is involved in calcium sequestration associated with muscular excitation and contraction. Alternative spl…
ENSG00000070961	Endothelial Cell	ATP2B1	ATPase, Ca++ transporting, plasma membrane 1	9.1	The protein encoded by this gene belongs to the family of P-type primary ion transport ATPases characterized by the formation of an aspartyl phosphate intermediate during the reaction cycle. These enzymes remove bivalent calcium ions from eukaryotic cells against very large concentration gradients and play a critical role in intracellular calcium homeostasis. The mammalian plasma membrane calcium…
ENSG00000058668	Endothelial Cell	ATP2B4	ATPase, Ca++ transporting, plasma membrane 4	3.2	The protein encoded by this gene belongs to the family of P-type primary ion transport ATPases characterized by the formation of an aspartyl phosphate intermediate during the reaction cycle. These enzymes remove bivalent calcium ions from eukaryotic cells against very large concentration gradients and play a critical role in intracellular calcium homeostasis. The mammalian plasma membrane calcium…
ENSG00000147416	Endothelial Cell	ATP6V1B2	ATPase, H+ transporting, lysosomal 56/58kDa, V1 subunit B2	15.9	This gene encodes a component of vacuolar ATPase (V-ATPase), a multisubunit enzyme that mediates acidification of eukaryotic intracellular organelles. V-ATPase dependent organelle acidification is necessary for such intracellular processes as protein sorting, zymogen activation, receptor-mediated endocytosis, and synaptic vesicle proton gradient generation. V-ATPase is composed of a cytosolic V1 …
ENSG00000166710	Endothelial Cell + Other Pattern	B2M	Beta-2-microglobulin	554.9	This gene encodes a serum protein found in association with the major histocompatibility complex (MHC) class I heavy chain on the surface of nearly all nucleated cells. The protein has a predominantly beta-pleated sheet structure that can form amyloid fibrils in some pathological conditions. The encoded antimicrobial protein displays antibacterial activity in amniotic fluid. A mutation in this ge…
ENSG00000187244	Endothelial Cell	BCAM	Basal cell adhesion molecule (Lutheran blood group)	10.5	This gene encodes Lutheran blood group glycoprotein, a member of the immunoglobulin superfamily and a receptor for the extracellular matrix protein, laminin. The protein contains five extracellular immunoglobulin domains, a single transmembrane domain, and a short C-terminal cytoplasmic tail. This protein may play a role in epithelial cell cancer and in vaso-occlusion of red blood cells in sickle…
ENSG00000133169	Endothelial Cell	BEX1	Brain expressed, X-linked 1	1.8
ENSG00000188334	Endothelial Cell	BSPH1	Binder of sperm protein homolog 1	0
ENSG00000109743	Endothelial Cell + Other Pattern	BST1	Bone marrow stromal cell antigen 1	2.6	Bone marrow stromal cell antigen-1 is a stromal cell line-derived glycosylphosphatidylinositol-anchored molecule that facilitates pre-B-cell growth. The deduced amino acid sequence exhibits 33% similarity with CD38. BST1 expression is enhanced in bone marrow stromal cell lines derived from patients with rheumatoid arthritis. The polyclonal B-cell abnormalities in rheumatoid arthritis may be, at l…
ENSG00000130303	Endothelial Cell	BST2	Bone marrow stromal cell antigen 2	83.7	Bone marrow stromal cells are involved in the growth and development of B-cells. The specific function of the protein encoded by the bone marrow stromal cell antigen 2 is undetermined; however, this protein may play a role in pre-B-cell growth and in rheumatoid arthritis. [provided by RefSeq, Jul 2008]
ENSG00000112276	Endothelial Cell	BVES	Blood vessel epicardial substance	0.1	This gene encodes a member of the POP family of proteins containing three putative transmembrane domains. This gene is expressed in cardiac and skeletal muscle and may play an important role in development of these tissues. The mouse ortholog may be involved in the regeneration of adult skeletal muscle and may act as a cell adhesion molecule in coronary vasculogenesis. Three transcript variants e…
ENSG00000159189	Endothelial Cell	C1QC	Complement component 1, q subcomponent, C chain	77	This gene encodes a major constituent of the human complement subcomponent C1q. C1q associates with C1r and C1s in order to yield the first component of the serum complement system. A deficiency in C1q has been associated with lupus erythematosus and glomerulonephritis. C1q is composed of 18 polypeptide chains: six A-chains, six B-chains, and six C-chains. Each chain contains a collagen-like regi…
ENSG00000111731	Endothelial Cell + Other Pattern	C2CD5	C2 calcium-dependent domain containing 5	3.5
ENSG00000184608	Endothelial Cell + Other Pattern	C8orf12	Chromosome 8 open reading frame 12
ENSG00000230185	Endothelial Cell + Other Pattern	C9orf147	Chromosome 9 open reading frame 147
ENSG00000186354	Endothelial Cell	C9orf47	Chromosome 9 open reading frame 47	0.1
ENSG00000175544	Endothelial Cell	CABP4	Calcium binding protein 4	0.2	This gene encodes a member of the CABP family of calcium binding protein characterized by four EF-hand motifs. Mutations in this gene are associated with congenital stationary night blindness type 2B. Three transcript variants encoding two different isoforms have been found for this gene. [provided by RefSeq, Jul 2014]
ENSG00000151067	Endothelial Cell	CACNA1C	Calcium channel, voltage-dependent, L type, alpha 1C subunit	0.1	This gene encodes an alpha-1 subunit of a voltage-dependent calcium channel. Calcium channels mediate the influx of calcium ions into the cell upon membrane polarization. The alpha-1 subunit consists of 24 transmembrane segments and forms the pore through which ions pass into the cell. The calcium channel consists of a complex of alpha-1, alpha-2/delta, beta, and gamma subunits in a 1:1:1:1 ratio…
ENSG00000006283	Endothelial Cell	CACNA1G	Calcium channel, voltage-dependent, T type, alpha 1G subunit	0	Voltage-sensitive calcium channels mediate the entry of calcium ions into excitable cells, and are also involved in a variety of calcium-dependent processes, including muscle contraction, hormone or neurotransmitter release, gene expression, cell motility, cell division, and cell death. This gene encodes a T-type, low-voltage activated calcium channel. The T-type channels generate currents that a…
ENSG00000075461	Endothelial Cell	CACNG4	Calcium channel, voltage-dependent, gamma subunit 4	0	The protein encoded by this gene is a type I transmembrane AMPA receptor regulatory protein (TARP). TARPs regulate both trafficking and channel gating of the AMPA receptors. This gene is part of a functionally diverse eight-member protein subfamily of the PMP-22/EMP/MP20 family and is located in a cluster with two family members, a type II TARP and a calcium channel gamma subunit. [provided by Re…
ENSG00000122786	Endothelial Cell	CALD1	Caldesmon 1	92.6	This gene encodes a calmodulin- and actin-binding protein that plays an essential role in the regulation of smooth muscle and nonmuscle contraction. The conserved domain of this protein possesses the binding activities to Ca(2+)-calmodulin, actin, tropomyosin, myosin, and phospholipids. This protein is a potent inhibitor of the actin-tropomyosin activated myosin MgATPase, and serves as a mediatin…
ENSG00000198668	Endothelial Cell	CALM1	Calmodulin 1 (phosphorylase kinase, delta)	80.7	This gene encodes a member of the EF-hand calcium-binding protein family. It is one of three genes which encode an identical calcium binding protein which is one of the four subunits of phosphorylase kinase. Two pseudogenes have been identified on chromosome 7 and X. Multiple transcript variants encoding different isoforms have been found for this gene.[provided by RefSeq, Oct 2009]
ENSG00000127022	Endothelial Cell + Other Pattern	CANX	Calnexin	134.8	This gene encodes a member of the calnexin family of molecular chaperones. The encoded protein is a calcium-binding, endoplasmic reticulum (ER)-associated protein that interacts transiently with newly synthesized N-linked glycoproteins, facilitating protein folding and assembly. It may also play a central role in the quality control of protein folding by retaining incorrectly folded protein subun…
ENSG00000116489	Endothelial Cell + Other Pattern	CAPZA1	Capping protein (actin filament) muscle Z-line, alpha 1	20.8	CAPZA1 is a member of the F-actin capping protein alpha subunit family. This gene encodes the alpha subunit of the barbed-end actin binding protein. The protein regulates growth of the actin filament by capping the barbed end of growing actin filaments. [provided by RefSeq, Jul 2008]
ENSG00000105974	Endothelial Cell	CAV1	Caveolin 1, caveolae protein, 22kDa	9.3	The scaffolding protein encoded by this gene is the main component of the caveolae plasma membranes found in most cell types. The protein links integrin subunits to the tyrosine kinase FYN, an initiating step in coupling integrins to the Ras-ERK pathway and promoting cell cycle progression. The gene is a tumor suppressor gene candidate and a negative regulator of the Ras-p42/44 mitogen-activated …
ENSG00000105971	Endothelial Cell	CAV2	Caveolin 2	14.5	The protein encoded by this gene is a major component of the inner surface of caveolae, small invaginations of the plasma membrane, and is involved in essential cellular functions, including signal transduction, lipid metabolism, cellular growth control and apoptosis. This protein may function as a tumor suppressor. This gene and related family member (CAV1) are located next to each other on chro…
ENSG00000149201	Endothelial Cell	CCDC81	Coiled-coil domain containing 81	0
ENSG00000163249	Endothelial Cell + Other Pattern	CCNYL1	Cyclin Y-like 1	4.1
ENSG00000260916	Endothelial Cell	CCPG1	Cell cycle progression 1	21.6
ENSG00000177697	Endothelial Cell	CD151	CD151 molecule (Raph blood group)	38.9	The protein encoded by this gene is a member of the transmembrane 4 superfamily, also known as the tetraspanin family. Most of these members are cell-surface proteins that are characterized by the presence of four hydrophobic domains. The proteins mediate signal transduction events that play a role in the regulation of cell development, activation, growth and motility. This encoded protein is a c…
ENSG00000186074	Endothelial Cell	CD300LF	CD300 molecule-like family member f	0.7	This gene encodes a member of the CD300 protein family. Members of this family are cell surface glycoproteins with a single IgV-like extracellular domain, and are involved in the regulation of immune response. The encoded protein is an inhibitory receptor. Alternative splicing results in multiple transcript variants. [provided by RefSeq, Jan 2014]
ENSG00000174059	Endothelial Cell	CD34	CD34 molecule	2.2	The protein encoded by this gene may play a role in the attachment of stem cells to the bone marrow extracellular matrix or to stromal cells. This single-pass membrane protein is highly glycosylated and phosphorylated by protein kinase C. Two transcript variants encoding different isoforms have been found for this gene. [provided by RefSeq, Aug 2011]
ENSG00000135218	Endothelial Cell	CD36	CD36 molecule (thrombospondin receptor)	22.6	The protein encoded by this gene is the fourth major glycoprotein of the platelet surface and serves as a receptor for thrombospondin in platelets and various cell lines. Since thrombospondins are widely distributed proteins involved in a variety of adhesive processes, this protein may have important functions as a cell adhesion molecule. It binds to collagen, thrombospondin, anionic phospholipid…
ENSG00000085063	Endothelial Cell	CD59	CD59 molecule, complement regulatory protein	100.4	This gene encodes a cell surface glycoprotein that regulates complement-mediated cell lysis, and it is involved in lymphocyte signal transduction. This protein is a potent inhibitor of the complement membrane attack complex, whereby it binds complement C8 and/or C9 during the assembly of this complex, thereby inhibiting the incorporation of multiple copies of C9 into the complex, which is necessa…
ENSG00000110651	Endothelial Cell	CD81	CD81 molecule	338.4	The protein encoded by this gene is a member of the transmembrane 4 superfamily, also known as the tetraspanin family. Most of these members are cell-surface proteins that are characterized by the presence of four hydrophobic domains. The proteins mediate signal transduction events that play a role in the regulation of cell development, activation, growth and motility. This encoded protein is a c…
ENSG00000085117	Endothelial Cell	CD82	CD82 molecule	14.5	This metastasis suppressor gene product is a membrane glycoprotein that is a member of the transmembrane 4 superfamily. Expression of this gene has been shown to be downregulated in tumor progression of human cancers and can be activated by p53 through a consensus binding sequence in the promoter. Its expression and that of p53 are strongly correlated, and the loss of expression of these two prot…
ENSG00000010278	Endothelial Cell	CD9	CD9 molecule	29.4	This gene encodes a member of the transmembrane 4 superfamily, also known as the tetraspanin family. Tetraspanins are cell surface glycoproteins with four transmembrane domains that form multimeric complexes with other cell surface proteins. The encoded protein functions in many cellular processes including differentiation, adhesion, and signal transduction, and expression of this gene plays a cr…
ENSG00000125810	Endothelial Cell	CD93	CD93 molecule	5.7	The protein encoded by this gene is a cell-surface glycoprotein and type I membrane protein that was originally identified as a myeloid cell-specific marker. The encoded protein was once thought to be a receptor for C1q, but now is thought to instead be involved in intercellular adhesion and in the clearance of apoptotic cells. The intracellular cytoplasmic tail of this protein has been found to …
ENSG00000123146	Endothelial Cell	CD97	CD97 molecule	8.6	This gene encodes a member of the EGF-TM7 subfamily of adhesion G protein-coupled receptors, which mediate cell-cell interactions. These proteins are cleaved by self-catalytic proteolysis into a large extracellular subunit and seven-span transmembrane subunit, which associate at the cell surface as a receptor complex. The encoded protein may play a role in cell adhesion as well as leukocyte recru…
ENSG00000002586	Endothelial Cell	CD99	CD99 molecule	71.2	The protein encoded by this gene is a cell surface glycoprotein involved in leukocyte migration, T-cell adhesion, ganglioside GM1 and transmembrane protein transport, and T-cell death by a caspase-independent pathway. In addition, the encoded protein may have the ability to rearrange the actin cytoskeleton and may also act as an oncosuppressor in osteosarcoma. Cyclophilin A binds to CD99 and may …
ENSG00000102181	Endothelial Cell + Other Pattern	CD99L2	CD99 molecule-like 2	10.6	This gene encodes a cell-surface protein that is similar to CD99. A similar protein in mouse functions as an adhesion molecule during leukocyte extravasation. Alternate splicing results in multiple transcript variants. [provided by RefSeq, May 2010]
ENSG00000170779	Endothelial Cell	CDCA4	Cell division cycle associated 4	1.1	This gene encodes a protein that belongs to the E2F family of transcription factors. This protein regulates E2F-dependent transcriptional activation and cell proliferation, mainly through the E2F/retinoblastoma protein pathway. It also functions in the regulation of JUN oncogene expression. This protein shows distinctive nuclear-mitotic apparatus distribution, it is involved in spindle organizati…
ENSG00000100490	Endothelial Cell	CDKL1	Cyclin-dependent kinase-like 1 (CDC2-related kinase)	0.3	This gene product is a member of a large family of CDC2-related serine/threonine protein kinases. It accumulates primarily in the nucleus. Two transcript variants encoding different isoforms have been found for this gene. [provided by RefSeq, Aug 2013]
ENSG00000185043	Endothelial Cell	CIB1	Calcium and integrin binding 1 (calmyrin)	41.9	This gene encodes a member of the EF-hand domain-containing calcium-binding superfamily. The encoded protein interacts with many other proteins, including the platelet integrin alpha-IIb-beta-3, DNA-dependent protein kinase, presenilin-2, focal adhesion kinase, p21 activated kinase, and protein kinase D. The encoded protein may be involved in cell survival and proliferation, and is associated wit…
ENSG00000184113	Endothelial Cell	CLDN5	Claudin 5	2.2	This gene encodes a member of the claudin family. Claudins are integral membrane proteins and components of tight junction strands. Tight junction strands serve as a physical barrier to prevent solutes and water from passing freely through the paracellular space between epithelial or endothelial cell sheets. Mutations in this gene have been found in patients with velocardiofacial syndrome. Altern…
ENSG00000182566	Endothelial Cell	CLEC4G	C-type lectin domain family 4, member G	24.8	This gene encodes a glycan-binding receptor and member of the C-type lectin family which plays a role in the T-cell immune response. Multiple transcript variants encoding different isoforms have been found for this gene. [provided by RefSeq, Oct 2011]
ENSG00000104938	Endothelial Cell	CLEC4M	C-type lectin domain family 4, member M	20	This gene encodes a transmembrane receptor and is often referred to as L-SIGN because of its expression in the endothelial cells of the lymph nodes and liver. The encoded protein is involved in the innate immune system and recognizes numerous evolutionarily divergent pathogens ranging from parasites to viruses, with a large impact on public health. The protein is organized into three distinct dom…
ENSG00000166997	Endothelial Cell	CNPY4	Canopy FGF signaling regulator 4	3.1
ENSG00000172725	Endothelial Cell	CORO1B	Coronin, actin binding protein, 1B	10.2	Members of the coronin family, such as CORO1B, are WD repeat-containing actin-binding proteins that regulate cell motility (Cai et al., 2005 [PubMed 16027158]).[supplied by OMIM, Mar 2008]
ENSG00000121898	Endothelial Cell	CPXM2	Carboxypeptidase X (M14 family), member 2	1
ENSG00000182809	Endothelial Cell	CRIP2	Cysteine-rich protein 2	4.8	This gene encodes a putative transcription factor with two LIM zinc-binding domains. The encoded protein may participate in the differentiation of smooth muscle tissue. Alternative splicing results in multiple transcript variants. [provided by RefSeq, Aug 2012]
ENSG00000105662	Endothelial Cell	CRTC1	CREB regulated transcription coactivator 1	1
ENSG00000118523	Endothelial Cell	CTGF	Connective tissue growth factor	51.4	The protein encoded by this gene is a mitogen that is secreted by vascular endothelial cells. The encoded protein plays a role in chondrocyte proliferation and differentiation, cell adhesion in many cell types, and is related to platelet-derived growth factor. Certain polymorphisms in this gene have been linked with a higher incidence of systemic sclerosis. [provided by RefSeq, Nov 2009]
ENSG00000198561	Endothelial Cell	CTNND1	Catenin (cadherin-associated protein), delta 1	32.4	This gene encodes a member of the Armadillo protein family, which function in adhesion between cells and signal transduction. Multiple translation initiation codons and alternative splicing result in many different isoforms being translated. Not all of the full-length natures of the described transcript variants have been determined. Read-through transcription also exists between this gene and th…
ENSG00000071967	Endothelial Cell	CYBRD1	Cytochrome b reductase 1	9	This gene is a member of the cytochrome b(561) family that encodes an iron-regulated protein. It highly expressed in the duodenal brush border membrane. It has ferric reductase activity and is believed to play a physiological role in dietary iron absorption. [provided by RefSeq, Jul 2008]
ENSG00000108669	Endothelial Cell	CYTH1	Cytohesin 1	7.7	The protein encoded by this gene is a member of the PSCD family. Members of this family have identical structural organization that consists of an N-terminal coiled-coil motif, a central Sec7 domain, and a C-terminal pleckstrin homology (PH) domain. The coiled-coil motif is involved in homodimerization, the Sec7 domain contains guanine-nucleotide exchange protein activity, and the PH domain inter…
ENSG00000163331	Endothelial Cell + Other Pattern	DAPL1	Death associated protein-like 1	0
ENSG00000006634	Endothelial Cell	DBF4	DBF4 homolog (S. cerevisiae)	0
ENSG00000197410	Endothelial Cell	DCHS2	Dachsous cadherin-related 2	0
ENSG00000108654	Endothelial Cell	DDX5	DEAD (Asp-Glu-Ala-Asp) box helicase 5	81.7	DEAD box proteins, characterized by the conserved motif Asp-Glu-Ala-Asp (DEAD), are putative RNA helicases. They are implicated in a number of cellular processes involving alteration of RNA secondary structure, such as translation initiation, nuclear and mitochondrial splicing, and ribosome and spliceosome assembly. Based on their distribution patterns, some members of this family are believed to…
ENSG00000184544	Endothelial Cell	DHRS7C	Dehydrogenase/reductase (SDR family) member 7C	0
ENSG00000184911	Endothelial Cell	DMRTC1B	DMRT-like family C1B	0
ENSG00000124721	Endothelial Cell + Other Pattern	DNAH8	Dynein, axonemal, heavy chain 8	0	The protein encoded by this gene is a heavy chain of an axonemal dynein involved in sperm and respiratory cilia motility. Axonemal dyneins generate force through hydrolysis of ATP and binding to microtubules. [provided by RefSeq, Jan 2012]
ENSG00000150760	Endothelial Cell	DOCK1	Dedicator of cytokinesis 1	4.4	This gene encodes a member of the dedicator of cytokinesis protein family. Dedicator of cytokinesis proteins act as guanine nucleotide exchange factors for small Rho family G proteins. The encoded protein regulates the small GTPase Rac, thereby influencing several biological processes, including phagocytosis and cell migration. Overexpression of this gene has also been associated with certain can…
ENSG00000188641	Endothelial Cell	DPYD	Dihydropyrimidine dehydrogenase	23.6	The protein encoded by this gene is a pyrimidine catabolic enzyme and the initial and rate-limiting factor in the pathway of uracil and thymidine catabolism. Mutations in this gene result in dihydropyrimidine dehydrogenase deficiency, an error in pyrimidine metabolism associated with thymine-uraciluria and an increased risk of toxicity in cancer patients receiving 5-fluorouracil chemotherapy. Two…
ENSG00000092964	Endothelial Cell	DPYSL2	Dihydropyrimidinase-like 2	8.9	This gene encodes a member of the collapsin response mediator protein family. Collapsin response mediator proteins form homo- and hetero-tetramers and facilitate neuron guidance, growth and polarity. The encoded protein promotes microtubule assembly and is required for Sema3A-mediated growth cone collapse, and also plays a role in synaptic signaling through interactions with calcium channels. Thi…
ENSG00000113657	Endothelial Cell	DPYSL3	Dihydropyrimidinase-like 3	2.2
ENSG00000177103	Endothelial Cell	DSCAML1	Down syndrome cell adhesion molecule like 1	0
ENSG00000163840	Endothelial Cell	DTX3L	Deltex 3-like (Drosophila)	10.7	DTX3L functions as an E3 ubiquitin ligase (Takeyama et al., 2003 [PubMed 12670957]).[supplied by OMIM, Nov 2009]
ENSG00000135636	Endothelial Cell	DYSF	Dysferlin	2.7	The protein encoded by this gene belongs to the ferlin family and is a skeletal muscle protein found associated with the sarcolemma. It is involved in muscle contraction and contains C2 domains that play a role in calcium-mediated membrane fusion events, suggesting that it may be involved in membrane regeneration and repair. In addition, the protein encoded by this gene binds caveolin-3, a skelet…
ENSG00000131080	Endothelial Cell	EDA2R	Ectodysplasin A2 receptor	0.2	EDA-A1 and EDA-A2 are two isoforms of ectodysplasin that are encoded by the anhidrotic ectodermal dysplasia (EDA) gene. Mutations in EDA give rise to a clinical syndrome characterized by loss of hair, sweat glands, and teeth. The protein encoded by this gene specifically binds to EDA-A2 isoform. This protein is a type III transmembrane protein of the TNFR (tumor necrosis factor receptor) superfam…
ENSG00000114654	Endothelial Cell	EFCC1	EF-hand and coiled-coil domain containing 1	0.1
ENSG00000110047	Endothelial Cell	EHD1	EH-domain containing 1	8.2	This gene belongs to a highly conserved gene family encoding EPS15 homology (EH) domain-containing proteins. The protein-binding EH domain was first noted in EPS15, a substrate for the epidermal growth factor receptor. The EH domain has been shown to be an important motif in proteins involved in protein-protein interactions and in intracellular sorting. The protein encoded by this gene is thought…
ENSG00000024422	Endothelial Cell	EHD2	EH-domain containing 2	3.9	This gene encodes a member of the EH domain-containing protein family. These proteins are characterized by a C-terminal EF-hand domain, a nucleotide-binding consensus site at the N terminus and a bipartite nuclear localization signal. The encoded protein interacts with the actin cytoskeleton through an N-terminal domain and also binds to an EH domain-binding protein through the C-terminal EH doma…
ENSG00000128829	Endothelial Cell	EIF2AK4	Eukaryotic translation initiation factor 2 alpha kinase 4	6.4	This gene encodes a member of a family of kinases that phosphorylate the alpha subunit of eukaryotic translation initiation factor-2 (EIF2), resulting in the downregulaton of protein synthesis. The encoded protein responds to amino acid deprivation by binding uncharged transfer RNAs. It may also be activated by glucose deprivation and viral infection. Mutations in this gene have been found in ind…
ENSG00000205609	Endothelial Cell	EIF3CL	Eukaryotic translation initiation factor 3, subunit C-like	25.3
ENSG00000175766	Endothelial Cell	EIF4E1B	Eukaryotic translation initiation factor 4E family member 1B	0
ENSG00000213853	Endothelial Cell	EMP2	Epithelial membrane protein 2	20.5
ENSG00000106991	Endothelial Cell	ENG	Endoglin	23.4	This gene encodes a homodimeric transmembrane protein which is a major glycoprotein of the vascular endothelium. This protein is a component of the transforming growth factor beta receptor complex and it binds to the beta1 and beta3 peptides with high affinity. Mutations in this gene cause hereditary hemorrhagic telangiectasia, also known as Osler-Rendu-Weber syndrome 1, an autosomal dominant mul…
ENSG00000138792	Endothelial Cell	ENPEP	Glutamyl aminopeptidase (aminopeptidase A)	8.3
ENSG00000136960	Endothelial Cell	ENPP2	Ectonucleotide pyrophosphatase/phosphodiesterase 2	7.4	The protein encoded by this gene functions as both a phosphodiesterase, which cleaves phosphodiester bonds at the 5' end of oligonucleotides, and a phospholipase, which catalyzes production of lysophosphatidic acid (LPA) in extracellular fluids. LPA evokes growth factor-like responses including stimulation of cell proliferation and chemotaxis. This gene product stimulates the motility of tumor ce…
ENSG00000138185	Endothelial Cell	ENTPD1	Ectonucleoside triphosphate diphosphohydrolase 1	3
ENSG00000079819	Endothelial Cell	EPB41L2	Erythrocyte membrane protein band 4.1-like 2	10.9
ENSG00000198758	Endothelial Cell	EPS8L3	EPS8-like 3	0	This gene encodes a protein that is related to epidermal growth factor receptor pathway substrate 8 (EPS8), a substrate for the epidermal growth factor receptor. The function of this protein is unknown. Alternatively spliced transcript variants encoding different isoforms exist. [provided by RefSeq, Jul 2008]
ENSG00000082805	Endothelial Cell	ERC1	ELKS/RAB6-interacting/CAST family member 1	3.6	The protein encoded by this gene is a member of a family of RIM-binding proteins. RIMs are active zone proteins that regulate neurotransmitter release. This gene has been found fused to the receptor-type tyrosine kinase gene RET by gene rearrangement due to the translocation t(10;12)(q11;p13) in thyroid papillary carcinoma. Alternative splicing results in multiple transcript variants. [provided b…
ENSG00000226887	Endothelial Cell	ERVMER34-1	Endogenous retrovirus group MER34, member 1	0
ENSG00000104413	Endothelial Cell	ESRP1	Epithelial splicing regulatory protein 1	0.1	ESPR1 is an epithelial cell-type-specific splicing regulator (Warzecha et al., 2009 [PubMed 19285943]).[supplied by OMIM, Aug 2009]
ENSG00000081177	Endothelial Cell	EXD2	Exonuclease 3'-5' domain containing 2	2.3
ENSG00000185010	Endothelial Cell	F8	Coagulation factor VIII, procoagulant component	7.5	This gene encodes coagulation factor VIII, which participates in the intrinsic pathway of blood coagulation; factor VIII is a cofactor for factor IXa which, in the presence of Ca+2 and phospholipids, converts factor X to the activated form Xa. This gene produces two alternatively spliced transcripts. Transcript variant 1 encodes a large glycoprotein, isoform a, which circulates in plasma and asso…
ENSG00000204930	Endothelial Cell	FAM221B	Family with sequence similarity 221, member B	0
ENSG00000272414	Endothelial Cell	FAM47E-STBD1	Uncharacterized protein LOC100631383	22.5	This locus represents naturally occurring read-through transcription between the neighboring FAM47E (family with sequence similarity 47, member E) and STBD1 (starch binding domain 1) genes on chromosome 4. The read-through transcript encodes a protein that shares sequence identity with the upstream gene product but its C-terminal region is distinct due to frameshifts relative to the downstream ge…
ENSG00000077942	Endothelial Cell + Other Pattern	FBLN1	Fibulin 1	4.3	Fibulin 1 is a secreted glycoprotein that becomes incorporated into a fibrillar extracellular matrix. Calcium-binding is apparently required to mediate its binding to laminin and nidogen. It mediates platelet adhesion via binding fibrinogen. Four splice variants which differ in the 3' end have been identified. Each variant encodes a different isoform, but no functional distinctions have been iden…
ENSG00000072694	Endothelial Cell	FCGR2B	Fc fragment of IgG, low affinity IIb, receptor (CD32)	10.6	The protein encoded by this gene is a low affinity receptor for the Fc region of immunoglobulin gamma complexes. The encoded protein is involved in the phagocytosis of immune complexes and in the regulation of antibody production by B-cells. Variations in this gene may increase susceptibilty to systemic lupus erythematosus (SLE). Several transcript variants encoding different isoforms have been f…
ENSG00000022267	Endothelial Cell	FHL1	Four and a half LIM domains 1	13.4	This gene encodes a member of the four-and-a-half-LIM-only protein family. Family members contain two highly conserved, tandemly arranged, zinc finger domains with four highly conserved cysteines binding a zinc atom in each zinc finger. Expression of these family members occurs in a cell- and tissue-specific mode and these proteins are involved in many cellular processes. Mutations in this gene h…
ENSG00000119321	Endothelial Cell	FKBP15	FK506 binding protein 15, 133kDa	4.9
ENSG00000196924	Endothelial Cell	FLNA	Filamin A, alpha	12.3	The protein encoded by this gene is an actin-binding protein that crosslinks actin filaments and links actin filaments to membrane glycoproteins. The encoded protein is involved in remodeling the cytoskeleton to effect changes in cell shape and migration. This protein interacts with integrins, transmembrane receptor complexes, and second messengers. Defects in this gene are a cause of several syn…
ENSG00000136068	Endothelial Cell	FLNB	Filamin B, beta	27.5	This gene encodes a member of the filamin family. The encoded protein interacts with glycoprotein Ib alpha as part of the process to repair vascular injuries. The platelet glycoprotein Ib complex includes glycoprotein Ib alpha, and it binds the actin cytoskeleton. Mutations in this gene have been found in several conditions: atelosteogenesis type 1 and type 3; boomerang dysplasia; autosomal domin…
ENSG00000132589	Endothelial Cell + Other Pattern	FLOT2	Flotillin 2	12.8	Caveolae are small domains on the inner cell membrane involved in vesicular trafficking and signal transduction. This gene encodes a caveolae-associated, integral membrane protein, which is thought to function in neuronal signaling. [provided by RefSeq, Jul 2008]
ENSG00000102755	Endothelial Cell	FLT1	Fms-related tyrosine kinase 1	11	This gene encodes a member of the vascular endothelial growth factor receptor (VEGFR) family. VEGFR family members are receptor tyrosine kinases (RTKs) which contain an extracellular ligand-binding region with seven immunoglobulin (Ig)-like domains, a transmembrane segment, and a tyrosine kinase (TK) domain within the cytoplasmic domain. This protein binds to VEGFR-A, VEGFR-B and placental growth…
ENSG00000187239	Endothelial Cell + Other Pattern	FNBP1	Formin binding protein 1	6.2	The protein encoded by this gene is a member of the formin-binding-protein family. The protein contains an N-terminal Fer/Cdc42-interacting protein 4 (CIP4) homology (FCH) domain followed by a coiled-coil domain, a proline-rich motif, a second coiled-coil domain, a Rho family protein-binding domain (RBD), and a C-terminal SH3 domain. This protein binds sorting nexin 2 (SNX2), tankyrase (TNKS), an…
ENSG00000110074	Endothelial Cell + Other Pattern	FOXRED1	FAD-dependent oxidoreductase domain containing 1	12.4	This gene encodes a protein that contains a FAD-dependent oxidoreductase domain. The encoded protein is localized to the mitochondria and may function as a chaperone protein required for the function of mitochondrial complex I. Mutations in this gene are associated with mitochondrial complex I deficiency. Alternatively spliced transcript variants have been observed for this gene. [provided by Ref…
ENSG00000075618	Endothelial Cell	FSCN1	Fascin homolog 1, actin-bundling protein (Strongylocentrotus purpuratus)	3.6	This gene encodes a member of the fascin family of actin-binding proteins. Fascin proteins organize F-actin into parallel bundles, and are required for the formation of actin-based cellular protrusions. The encoded protein plays a critical role in cell migration, motility, adhesion and cellular interactions. Expression of this gene is known to be regulated by several microRNAs, and overexpression…
ENSG00000089327	Endothelial Cell + Other Pattern	FXYD5	FXYD domain containing ion transport regulator 5	19.7	This gene encodes a member of a family of small membrane proteins that share a 35-amino acid signature sequence domain, beginning with the sequence PFXYD and containing 7 invariant and 6 highly conserved amino acids. The approved human gene nomenclature for the family is FXYD-domain containing ion transport regulator. Mouse FXYD5 has been termed RIC (Related to Ion Channel). FXYD2, also known as …
ENSG00000107862	Endothelial Cell	GBF1	Golgi brefeldin A resistant guanine nucleotide exchange factor 1	5.6	This gene encodes a member of the Sec7 domain family. The encoded protein is a guanine nucleotide exchange factor that regulates the recruitment of proteins to membranes by mediating GDP to GTP exchange. The encoded protein is localized to the Golgi apparatus and plays a role in vesicular trafficking by activating ADP ribosylation factor 1. The encoded protein has also been identified as an impor…
ENSG00000099998	Endothelial Cell	GGT5	Gamma-glutamyltransferase 5	20.2	This gene is a member of the gamma-glutamyl transpeptidase gene family, and some reports indicate that it is capable of cleaving the gamma-glutamyl moiety of glutathione. The protein encoded by this gene is synthesized as a single, catalytically-inactive polypeptide, that is processed post-transcriptionally to form a heavy and light subunit, with the catalytic activity contained within the small …
ENSG00000179144	Endothelial Cell + Other Pattern	GIMAP7	GTPase, IMAP family member 7	4.9	This gene encodes a protein belonging to the GTP-binding superfamily and to the immuno-associated nucleotide (IAN) subfamily of nucleotide-binding proteins. In humans, the IAN subfamily genes are located in a cluster at 7q36.1. [provided by RefSeq, Jul 2008]
ENSG00000179855	Endothelial Cell	GIPC3	GIPC PDZ domain containing family, member 3	0.4	The protein encoded by this gene belongs to the GIPC family. Studies in mice suggest that this gene is required for postnatal maturation of the hair bundle and long-term survival of hair cells and spiral ganglion in the ear. Mutations in this gene are associated with autosomal recessive deafness. [provided by RefSeq, Dec 2011]
ENSG00000114450	Endothelial Cell	GNB4	Guanine nucleotide binding protein (G protein), beta polypeptide 4	2.4	Heterotrimeric guanine nucleotide-binding proteins (G proteins), which integrate signals between receptors and effector proteins, are composed of an alpha, a beta, and a gamma subunit. These subunits are encoded by families of related genes. This gene encodes a beta subunit. Beta subunits are important regulators of alpha subunits, as well as of certain signal transduction receptors and effectors…
ENSG00000186469	Endothelial Cell	GNG2	Guanine nucleotide binding protein (G protein), gamma 2	4.9	This gene encodes one of the gamma subunits of a guanine nucleotide-binding protein. Such proteins are involved in signaling mechanisms across membranes. Various subunits forms heterodimers which then interact with the different signal molecules. [provided by RefSeq, Aug 2011]
ENSG00000130119	Endothelial Cell	GNL3L	Guanine nucleotide binding protein-like 3 (nucleolar)-like	1.9	The protein encoded by this gene appears to be a nucleolar GTPase that is essential for ribosomal pre-rRNA processing and cell proliferation. Two transcript variants encoding the same protein have been found for this gene. [provided by RefSeq, May 2010]
ENSG00000108433	Endothelial Cell	GOSR2	Golgi SNAP receptor complex member 2	16	This gene encodes a trafficking membrane protein which transports proteins among the medial- and trans-Golgi compartments. Due to its chromosomal location and trafficking function, this gene may be involved in familial essential hypertension. Three transcript variants encoding three different isoforms have been found for this gene. [provided by RefSeq, Jul 2008]
ENSG00000171659	Endothelial Cell	GPR34	G protein-coupled receptor 34	1.5	G protein-coupled receptors (GPCRs), such as GPR34, are integral membrane proteins containing 7 putative transmembrane domains (TMs). These proteins mediate signals to the interior of the cell via activation of heterotrimeric G proteins that in turn activate various effector proteins, ultimately resulting in a physiologic response.[supplied by OMIM, Apr 2006]
ENSG00000198932	Endothelial Cell	GPRASP1	G protein-coupled receptor associated sorting protein 1	0.6	This gene encodes a member of the GPRASP (G protein-coupled receptor associated sorting protein) family. The protein may modulate lysosomal sorting and functional down-regulation of a variety of G-protein coupled receptors. It targets receptors for degradation in lysosomes. The receptors interacting with this sorting protein include D2 dopamine receptor (DRD2), delta opioid receptor (OPRD1), beta…
ENSG00000178075	Endothelial Cell	GRAMD1C	GRAM domain containing 1C	7.7
ENSG00000120251	Endothelial Cell + Other Pattern	GRIA2	Glutamate receptor, ionotropic, AMPA 2	0	Glutamate receptors are the predominant excitatory neurotransmitter receptors in the mammalian brain and are activated in a variety of normal neurophysiologic processes. This gene product belongs to a family of glutamate receptors that are sensitive to alpha-amino-3-hydroxy-5-methyl-4-isoxazole propionate (AMPA), and function as ligand-activated cation channels. These channels are assembled from …
ENSG00000163873	Endothelial Cell	GRIK3	Glutamate receptor, ionotropic, kainate 3	0	Glutamate receptors are the predominant excitatory neurotransmitter receptors in the mammalian brain and are activated in a variety of normal neurophysiologic processes. This gene product belongs to the kainate family of glutamate receptors, which are composed of four subunits and function as ligand-activated ion channels. It is not certain if the subunit encoded by this gene is subject to RNA ed…
ENSG00000125812	Endothelial Cell	GZF1	GDNF-inducible zinc finger protein 1	2.3
ENSG00000105509	Endothelial Cell	HAS1	Hyaluronan synthase 1	0.3	Hyaluronan or hyaluronic acid (HA) is a high molecular weight unbranched polysaccharide synthesized by a wide variety of organisms from bacteria to mammals, and is a constituent of the extracellular matrix. It consists of alternating glucuronic acid and N-acetylglucosamine residues that are linked by beta-1-3 and beta-1-4 glycosidic bonds. HA is synthesized by membrane-bound synthase at the inner…
ENSG00000127946	Endothelial Cell	HIP1	Huntingtin interacting protein 1	3.3	The product of this gene is a membrane-associated protein that functions in clathrin-mediated endocytosis and protein trafficking within the cell. The encoded protein binds to the huntingtin protein in the brain; this interaction is lost in Huntington's disease. Alternative splicing results in multiple transcript variants. [provided by RefSeq, Jul 2013]
ENSG00000234745	Endothelial Cell	HLA-B	Major histocompatibility complex, class I, B	213.9	HLA-B belongs to the HLA class I heavy chain paralogues. This class I molecule is a heterodimer consisting of a heavy chain and a light chain (beta-2 microglobulin). The heavy chain is anchored in the membrane. Class I molecules play a central role in the immune system by presenting peptides derived from the endoplasmic reticulum lumen. They are expressed in nearly all cells. The heavy chain is a…
ENSG00000204287	Endothelial Cell + Other Pattern	HLA-DRA	Major histocompatibility complex, class II, DR alpha	249.3	HLA-DRA is one of the HLA class II alpha chain paralogues. This class II molecule is a heterodimer consisting of an alpha and a beta chain, both anchored in the membrane. It plays a central role in the immune system by presenting peptides derived from extracellular proteins. Class II molecules are expressed in antigen presenting cells (APC: B lymphocytes, dendritic cells, macrophages). The alpha …
ENSG00000204592	Endothelial Cell	HLA-E	Major histocompatibility complex, class I, E	122.9	HLA-E belongs to the HLA class I heavy chain paralogues. This class I molecule is a heterodimer consisting of a heavy chain and a light chain (beta-2 microglobulin). The heavy chain is anchored in the membrane. HLA-E binds a restricted subset of peptides derived from the leader peptides of other class I molecules. The heavy chain is approximately 45 kDa and its gene contains 8 exons. Exon one enc…
ENSG00000153187	Endothelial Cell	HNRNPU	Heterogeneous nuclear ribonucleoprotein U (scaffold attachment factor A)	41.2	This gene belongs to the subfamily of ubiquitously expressed heterogeneous nuclear ribonucleoproteins (hnRNPs). The hnRNPs are RNA binding proteins and they form complexes with heterogeneous nuclear RNA (hnRNA). These proteins are associated with pre-mRNAs in the nucleus and appear to influence pre-mRNA processing and other aspects of mRNA metabolism and transport. While all of the hnRNPs are pre…
ENSG00000249853	Endothelial Cell	HS3ST5	Heparan sulfate (glucosamine) 3-O-sulfotransferase 5	0	HS3ST5 belongs to a group of heparan sulfate 3-O-sulfotransferases (EC 2.8.2.23) that transfer sulfate from 3-prime-phosphoadenosine 5-prime phosphosulfate (PAPS) to heparan sulfate and heparin (Mochizuki et al., 2003 [PubMed 12740361]).[supplied by OMIM, Mar 2008]
ENSG00000106211	Endothelial Cell	HSPB1	Heat shock 27kDa protein 1	89.8	The protein encoded by this gene is induced by environmental stress and developmental changes. The encoded protein is involved in stress resistance and actin organization and translocates from the cytoplasm to the nucleus upon stress induction. Defects in this gene are a cause of Charcot-Marie-Tooth disease type 2F (CMT2F) and distal hereditary motor neuropathy (dHMN). [provided by RefSeq, Oct 20…
ENSG00000109854	Endothelial Cell + Other Pattern	HTATIP2	HIV-1 Tat interactive protein 2, 30kDa	34.8
ENSG00000090339	Endothelial Cell	ICAM1	Intercellular adhesion molecule 1	42.5	This gene encodes a cell surface glycoprotein which is typically expressed on endothelial cells and cells of the immune system. It binds to integrins of type CD11a / CD18, or CD11b / CD18 and is also exploited by Rhinovirus as a receptor. [provided by RefSeq, Jul 2008]
ENSG00000108622	Endothelial Cell	ICAM2	Intercellular adhesion molecule 2	5.2	The protein encoded by this gene is a member of the intercellular adhesion molecule (ICAM) family. All ICAM proteins are type I transmembrane glycoproteins, contain 2-9 immunoglobulin-like C2-type domains, and bind to the leukocyte adhesion LFA-1 protein. This protein may play a role in lymphocyte recirculation by blocking LFA-1-dependent cell adhesion. It mediates adhesive interactions important…
ENSG00000185201	Endothelial Cell	IFITM2	Interferon induced transmembrane protein 2	177
ENSG00000142089	Endothelial Cell	IFITM3	Interferon induced transmembrane protein 3	417.2	The protein encoded by this gene is an interferon-induced membrane protein that helps confer immunity to influenza A H1N1 virus, West Nile virus, and dengue virus. Two transcript variants, only one of them protein-coding, have been found for this gene. Another variant encoding an N-terminally truncated isoform has been reported, but the full-length nature of this variant has not been determined. …
ENSG00000142166	Endothelial Cell	IFNAR1	Interferon (alpha, beta and omega) receptor 1	19.7	The protein encoded by this gene is a type I membrane protein that forms one of the two chains of a receptor for interferons alpha and beta. Binding and activation of the receptor stimulates Janus protein kinases, which in turn phosphorylate several proteins, including STAT1 and STAT2. The encoded protein also functions as an antiviral factor. [provided by RefSeq, Jul 2008]
ENSG00000216588	Endothelial Cell	IGSF23	Immunoglobulin superfamily, member 23	4.9	This gene encodes a protein that has one immunoglobulin (Ig) domain and is a member of the immunoglobulin superfamily. Proteins in this superfamily are usually found on or in cell membranes and act as receptors in immune response pathways. [provided by RefSeq, Nov 2011]
ENSG00000163702	Endothelial Cell	IL17RC	Interleukin 17 receptor C	13.7	This gene encodes a single-pass type I membrane protein that shares similarity with the interleukin-17 receptor (IL-17RA). Unlike IL-17RA, which is predominantly expressed in hemopoietic cells, and binds with high affinity to only IL-17A, this protein is expressed in nonhemopoietic tissues, and binds both IL-17A and IL-17F with similar affinities. The proinflammatory cytokines, IL-17A and IL-17F,…
ENSG00000115602	Endothelial Cell	IL1RL1	Interleukin 1 receptor-like 1	1.2	The protein encoded by this gene is a member of the interleukin 1 receptor family. Studies of the similar gene in mouse suggested that this receptor can be induced by proinflammatory stimuli, and may be involved in the function of helper T cells. This gene, interleukin 1 receptor, type I (IL1R1), interleukin 1 receptor, type II (IL1R2) and interleukin 1 receptor-like 2 (IL1RL2) form a cytokine re…
ENSG00000197272	Endothelial Cell	IL27	Interleukin 27	4.2	The protein encoded by this gene is one of the subunits of a heterodimeric cytokine complex. This protein is related to interleukin 12A (IL12A). It interacts with Epstein-Barr virus induced gene 3 (EBI3), a protein similar to interleukin 12B (IL12B), and forms a complex that has been shown to drive rapid expansion of naive but not memory CD4(+) T cells. The complex is also found to synergize stro…
ENSG00000137033	Endothelial Cell + Other Pattern	IL33	Interleukin 33	13.3	IL33 (MIM 608678) is a member of the IL1 (see MIM 147760) family that potently drives production of T helper-2 (Th2)-associated cytokines (e.g., IL4; MIM 147780). IL33 is a ligand for IL33R (IL1RL1; MIM 601203), an IL1 family receptor that is selectively expressed on Th2 cells and mast cells (summary by Yagami et al., 2010 [PubMed 20926795]).[supplied by OMIM, Jan 2011]
ENSG00000204084	Endothelial Cell	INPP5B	Inositol polyphosphate-5-phosphatase, 75kDa	3.4	This gene encodes a member of a family of inositol polyphosphate-5-phosphatases. These enzymes function in the regulation of calcium signaling by inactivating inositol phosphates. The encoded protein is localized to the cytosol and mitochondria, and associates with membranes through an isoprenyl modification near the C-terminus. Alternatively spliced transcript variants of this gene have been des…
ENSG00000144711	Endothelial Cell	IQSEC1	IQ motif and Sec7 domain 1	5.8
ENSG00000066583	Endothelial Cell	ISOC1	Isochorismatase domain containing 1	36.2
ENSG00000161638	Endothelial Cell	ITGA5	Integrin, alpha 5 (fibronectin receptor, alpha polypeptide)	11.2	The product of this gene belongs to the integrin alpha chain family. Integrins are heterodimeric integral membrane proteins composed of an alpha chain and a beta chain. This gene encodes the integrin alpha 5 chain. Alpha chain 5 undergoes post-translational cleavage in the extracellular domain to yield disulfide-linked light and heavy chains that join with beta 1 to form a fibronectin receptor. I…
ENSG00000138448	Endothelial Cell + Other Pattern	ITGAV	Integrin, alpha V	8	This gene encodes a protein that is a member of the integrin superfamily. Integrins are heterodimeric integral membrane proteins composed of an alpha chain and a beta chain. This protein undergoes post-translational cleavage to yield disulfide-linked heavy and light chains that combine with multiple integrin beta chains to form different integrins. This protein has been shown to heterodimerize wi…
ENSG00000148841	Endothelial Cell	ITPRIP	Inositol 1,4,5-trisphosphate receptor interacting protein	6.8	This gene encodes a membrane-associated protein that binds the inositol 1,4,5-trisphosphate receptor (ITPR). The encoded protein enhances the sensitivity of ITPR to intracellular calcium signaling. Alternative splicing results in multiple transcript variants. [provided by RefSeq, Dec 2012]
ENSG00000198885	Endothelial Cell	ITPRIPL1	Inositol 1,4,5-trisphosphate receptor interacting protein-like 1	0.2
ENSG00000043143	Endothelial Cell	JADE2	Jade family PHD finger 2	0.9
ENSG00000081692	Endothelial Cell	JMJD4	Jumonji domain containing 4	2.1
ENSG00000186994	Endothelial Cell	KANK3	KN motif and ankyrin repeat domains 3	0.6
ENSG00000170852	Endothelial Cell	KBTBD2	Kelch repeat and BTB (POZ) domain containing 2	7.3
ENSG00000165572	Endothelial Cell + Other Pattern	KBTBD6	Kelch repeat and BTB (POZ) domain containing 6	1.5
ENSG00000177807	Endothelial Cell + Other Pattern	KCNJ10	Potassium inwardly-rectifying channel, subfamily J, member 10	0.4	This gene encodes a member of the inward rectifier-type potassium channel family, characterized by having a greater tendency to allow potassium to flow into, rather than out of, a cell. The encoded protein may form a heterodimer with another potassium channel protein and may be responsible for the potassium buffering action of glial cells in the brain. Mutations in this gene have been associated …
ENSG00000243335	Endothelial Cell	KCTD7	Potassium channel tetramerization domain containing 7	0.5	This gene encodes a member of the potassium channel tetramerization domain-containing protein family. Family members are identified on a structural basis and contain an amino-terminal domain similar to the T1 domain present in the voltage-gated potassium channel. Mutations in this gene have been associated with progressive myoclonic epilepsy-3. Alternative splicing results in multiple transcript …
ENSG00000050030	Endothelial Cell	KIAA2022	KIAA2022	0	An inversion on the X chromosome which disrupts this gene and a G-protein coupled purinergic receptor gene located in the pseudoautosomal region of the X chromosome has been linked to X linked mental retardation.[provided by RefSeq, Mar 2009]
ENSG00000183762	Endothelial Cell	KREMEN1	Kringle containing transmembrane protein 1	0.6	This gene encodes a high-affinity dickkopf homolog 1 (DKK1) transmembrane receptor that functionally cooperates with DKK1 to block wingless (WNT)/beta-catenin signaling. The encoded protein is a component of a membrane complex that modulates canonical WNT signaling through lipoprotein receptor-related protein 6 (LRP6). It contains extracellular kringle, WSC, and CUB domains. Alternatively spliced…
ENSG00000186847	Endothelial Cell	KRT14	Keratin 14	0.1	This gene encodes a member of the keratin family, the most diverse group of intermediate filaments. This gene product, a type I keratin, is usually found as a heterotetramer with two keratin 5 molecules, a type II keratin. Together they form the cytoskeleton of epithelial cells. Mutations in the genes for these keratins are associated with epidermolysis bullosa simplex. At least one pseudogene ha…
ENSG00000206107	Endothelial Cell	KRTAP27-1	Keratin associated protein 27-1	0
ENSG00000112769	Endothelial Cell	LAMA4	Laminin, alpha 4	2.4	Laminins, a family of extracellular matrix glycoproteins, are the major noncollagenous constituent of basement membranes. They have been implicated in a wide variety of biological processes including cell adhesion, differentiation, migration, signaling, neurite outgrowth and metastasis. Laminins are composed of 3 non identical chains: laminin alpha, beta and gamma (formerly A, B1, and B2, respect…
ENSG00000196878	Endothelial Cell	LAMB3	Laminin, beta 3	1.3	The product encoded by this gene is a laminin that belongs to a family of basement membrane proteins. This protein is a beta subunit laminin, which together with an alpha and a gamma subunit, forms laminin-5. Mutations in this gene cause epidermolysis bullosa junctional Herlitz type, and generalized atrophic benign epidermolysis bullosa, diseases that are characterized by blistering of the skin. …
ENSG00000135862	Endothelial Cell	LAMC1	Laminin, gamma 1 (formerly LAMB2)	5.8	Laminins, a family of extracellular matrix glycoproteins, are the major noncollagenous constituent of basement membranes. They have been implicated in a wide variety of biological processes including cell adhesion, differentiation, migration, signaling, neurite outgrowth and metastasis. Laminins, composed of 3 non identical chains: laminin alpha, beta and gamma (formerly A, B1, and B2, respective…
ENSG00000116586	Endothelial Cell	LAMTOR2	Late endosomal/lysosomal adaptor, MAPK and MTOR activator 2	41.1	The product of this gene is highly conserved with a mouse protein associated with the cytoplasmic face of late endosomes and lysosomes. The mouse protein interacts with MAPK scaffold protein 1, a component of the mitogen-activated protein kinase pathway. In humans, a mutation in this gene has been associated with a primary immunodeficiency syndrome, and suggests a role for this protein in endosom…
ENSG00000129988	Endothelial Cell	LBP	Lipopolysaccharide binding protein	181.2	The protein encoded by this gene is involved in the acute-phase immunologic response to gram-negative bacterial infections. Gram-negative bacteria contain a glycolipid, lipopolysaccharide (LPS), on their outer cell wall. Together with bactericidal permeability-increasing protein (BPI), the encoded protein binds LPS and interacts with the CD14 receptor, probably playing a role in regulating LPS-de…
ENSG00000213398	Endothelial Cell	LCAT	Lecithin-cholesterol acyltransferase	77.5	This gene encodes the extracellular cholesterol esterifying enzyme, lecithin-cholesterol acyltransferase. The esterification of cholesterol is required for cholesterol transport. Mutations in this gene have been found to cause fish-eye disease as well as LCAT deficiency. [provided by RefSeq, Jul 2008]
ENSG00000187942	Endothelial Cell	LDLRAD2	Low density lipoprotein receptor class A domain containing 2	0
ENSG00000186007	Endothelial Cell	LEMD1	LEM domain containing 1	0
ENSG00000167615	Endothelial Cell	LENG8	Leukocyte receptor cluster (LRC) member 8	7.4
ENSG00000183722	Endothelial Cell	LHFP	Lipoma HMGIC fusion partner	7.1	This gene is a member of the lipoma HMGIC fusion partner (LHFP) gene family, which is a subset of the superfamily of tetraspan transmembrane protein encoding genes. This gene is fused to a high-mobility group gene in a translocation-associated lipoma. Mutations in another LHFP-like gene result in deafness in humans and mice. Alternatively spliced transcript variants have been found; however, thei…
ENSG00000128342	Endothelial Cell	LIF	Leukemia inhibitory factor	3.1	The protein encoded by this gene is a pleiotropic cytokine with roles in several different systems. It is involved in the induction of hematopoietic differentiation in normal and myeloid leukemia cells, induction of neuronal cell differentiation, regulator of mesenchymal to epithelial conversion during kidney development, and may also have a role in immune tolerance at the maternal-fetal interfac…
ENSG00000154359	Endothelial Cell + Other Pattern	LONRF1	LON peptidase N-terminal domain and ring finger 1	3.3
ENSG00000138131	Endothelial Cell	LOXL4	Lysyl oxidase-like 4	0.7	This gene encodes a member of the lysyl oxidase gene family. The prototypic member of the family is essential to the biogenesis of connective tissue, encoding an extracellular copper-dependent amine oxidase that catalyses the first step in the formation of crosslinks in collagens and elastin. A highly conserved amino acid sequence at the C-terminus end appears to be sufficient for amine oxidase a…
ENSG00000198670	Endothelial Cell	LPA	Lipoprotein, Lp(a)	19.7	The protein encoded by this gene is a serine proteinase that inhibits the activity of tissue-type plasminogen activator I. The encoded protein constitutes a substantial portion of lipoprotein(a) and is proteolytically cleaved, resulting in fragments that attach to atherosclerotic lesions and promote thrombogenesis. Elevated plasma levels of this protein are linked to atherosclerosis. Depending on…
ENSG00000087253	Endothelial Cell	LPCAT2	Lysophosphatidylcholine acyltransferase 2	1.1	This gene encodes a member of the lysophospholipid acyltransferase family. The encoded enzyme may function in two ways: to catalyze the biosynthesis of platelet-activating factor (1-O-alkyl-2-acetyl-sn-glycero-3-phosphocholine) from 1-O-alkyl-sn-glycero-3-phosphocholine, and to catalyze the synthesis of glycerophospholipid precursors from arachidonyl-CoA and lysophosphatidylcholine. The encoded p…
ENSG00000188993	Endothelial Cell	LRRC66	Leucine rich repeat containing 66	0
ENSG00000197147	Endothelial Cell	LRRC8B	Leucine rich repeat containing 8 family, member B	1.9
ENSG00000169641	Endothelial Cell	LUZP1	Leucine zipper protein 1	1.7	This gene encodes a protein that contains a leucine zipper motif. The exact function of the encoded protein is not known. In mice this gene affects neural tube closure. Alternative splicing results in multiple transcript variants. [provided by RefSeq, Dec 2008]
ENSG00000079257	Endothelial Cell	LXN	Latexin	2	This gene encodes the only known protein inhibitor of zinc-dependent metallocarboxypeptidases. [provided by RefSeq, Oct 2008]
ENSG00000254087	Endothelial Cell	LYN	V-1-1 Yamaguchi sarcoma viral related oncogene homolog	9.9	This gene encodes a tyrosine protein kinase, which maybe involved in the regulation of mast cell degranulation, and erythroid differentiation. Alternatively spliced transcript variants encoding different isoforms have been found for this gene. [provided by RefSeq, Jul 2011]
ENSG00000177689	Endothelial Cell	MAGEB10	Melanoma antigen family B, 10	0	This gene encodes a member of the B subfamily of the melanoma associated antigen protein family. The encoded protein is specifically expressed in testis and tumor cells. [provided by RefSeq, Apr 2010]
ENSG00000187243	Endothelial Cell	MAGED4B	Melanoma antigen family D, 4B	0	This gene is a member of the MAGED gene family. It is expressed only in brain and ovary, and some transcript variants of this gene are specifically expressed in glioma cells. This gene is clustered with other MAGED genes on chromosome Xp11. Alternatively spliced transcript variants encoding different isoforms have been described for this gene. [provided by RefSeq, May 2011]
ENSG00000076706	Endothelial Cell	MCAM	Melanoma cell adhesion molecule	5.5
ENSG00000197614	Endothelial Cell	MFAP5	Microfibrillar associated protein 5	0.1	This gene encodes a 25-kD microfibril-associated glycoprotein which is a component of microfibrils of the extracellular matrix. The encoded protein promotes attachment of cells to microfibrils via alpha-V-beta-3 integrin. Deficiency of this gene in mice results in neutropenia. Alternate splicing results in multiple transcript variants encoding different isoforms. [provided by RefSeq, Jul 2014]
ENSG00000155545	Endothelial Cell	MIER3	Mesoderm induction early response 1, family member 3	4
ENSG00000148773	Endothelial Cell	MKI67	Marker of proliferation Ki-67	0.5	This gene encodes a nuclear protein that is associated with and may be necessary for cellular proliferation. Alternatively spliced transcript variants have been described. A related pseudogene exists on chromosome X. [provided by RefSeq, Mar 2009]
ENSG00000087245	Endothelial Cell	MMP2	Matrix metallopeptidase 2 (gelatinase A, 72kDa gelatinase, 72kDa type IV collagenase)	6.8	This gene is a member of the matrix metalloproteinase (MMP) gene family, that are zinc-dependent enzymes capable of cleaving components of the extracellular matrix and molecules involved in signal transduction. The protein encoded by this gene is a gelatinase A, type IV collagenase, that contains three fibronectin type II repeats in its catalytic site that allow binding of denatured type IV and V…
ENSG00000130830	Endothelial Cell	MPP1	Membrane protein, palmitoylated 1, 55kDa	14.3	This gene encodes the prototype of the membrane-associated guanylate kinase (MAGUK) family proteins. MAGUKs interact with the cytoskeleton and regulate cell proliferation, signaling pathways, and intercellular junctions. The encoded protein is an extensively palmitoylated membrane phosphoprotein containing a PDZ domain, a Src homology 3 (SH3) motif, and a guanylate kinase domain. This gene produc…
ENSG00000184350	Endothelial Cell	MRGPRE	MAS-related GPR, member E	0
ENSG00000271723	Endothelial Cell	MROH7-TTC4	MROH7-TTC4 readthrough (NMD candidate)
ENSG00000137547	Endothelial Cell	MRPL15	Mitochondrial ribosomal protein L15	22.8	Mammalian mitochondrial ribosomal proteins are encoded by nuclear genes and help in protein synthesis within the mitochondrion. Mitochondrial ribosomes (mitoribosomes) consist of a small 28S subunit and a large 39S subunit. They have an estimated 75% protein to rRNA composition compared to prokaryotic ribosomes, where this ratio is reversed. Another difference between mammalian mitoribosomes and …
ENSG00000204316	Endothelial Cell	MRPL38	Mitochondrial ribosomal protein L38	6.8	Mammalian mitochondrial ribosomal proteins are encoded by nuclear genes and help in protein synthesis within the mitochondrion. Mitochondrial ribosomes (mitoribosomes) consist of a small 28S subunit and a large 39S subunit. They have an estimated 75% protein to rRNA composition compared to prokaryotic ribosomes, where this ratio is reversed. Another difference between mammalian mitoribosomes and …
ENSG00000181991	Endothelial Cell	MRPS11	Mitochondrial ribosomal protein S11	2.7	Mammalian mitochondrial ribosomal proteins are encoded by nuclear genes and help in protein synthesis within the mitochondrion. Mitochondrial ribosomes (mitoribosomes) consist of a small 28S subunit and a large 39S subunit. They have an estimated 75% protein to rRNA composition compared to prokaryotic ribosomes, where this ratio is reversed. Another difference between mammalian mitoribosomes and …
ENSG00000204979	Endothelial Cell	MS4A13	Membrane-spanning 4-domains, subfamily A, member 13	0
ENSG00000188895	Endothelial Cell	MSL1	Male-specific lethal 1 homolog (Drosophila)	12.1
ENSG00000147065	Endothelial Cell + Other Pattern	MSN	Moesin	41.1	Moesin (for membrane-organizing extension spike protein) is a member of the ERM family which includes ezrin and radixin. ERM proteins appear to function as cross-linkers between plasma membranes and actin-based cytoskeletons. Moesin is localized to filopodia and other membranous protrusions that are important for cell-cell recognition and signaling and for cell movement. [provided by RefSeq, Jul …
ENSG00000173531	Endothelial Cell + Other Pattern	MST1	Macrophage stimulating 1 (hepatocyte growth factor-like)	97.7	The protein encoded by this gene contains four kringle domains and a serine protease domain, similar to that found in hepatic growth factor. Despite the presence of the serine protease domain, the encoded protein may not have any proteolytic activity. The receptor for this protein is RON tyrosine kinase, which upon activation stimulates ciliary motility of ciliated epithelial lung cells. This pro…
ENSG00000141971	Endothelial Cell	MVB12A	Multivesicular body subunit 12A	4.3
ENSG00000101608	Endothelial Cell	MYL12A	Myosin, light chain 12A, regulatory, non-sarcomeric	132.6
ENSG00000197879	Endothelial Cell	MYO1C	Myosin IC	11.9	This gene encodes a member of the unconventional myosin protein family, which are actin-based molecular motors. The protein is found in the cytoplasm, and one isoform with a unique N-terminus is also found in the nucleus. The nuclear isoform associates with RNA polymerase I and II and functions in transcription initiation. The mouse ortholog of this protein also functions in intracellular vesicle…
ENSG00000138386	Endothelial Cell	NAB1	NGFI-A binding protein 1 (EGR1 binding protein 1)	16.3
ENSG00000003509	Endothelial Cell + Other Pattern	NDUFAF7	NADH dehydrogenase (ubiquinone) complex I, assembly factor 7	2.9
ENSG00000215041	Endothelial Cell	NEURL4	Neuralized E3 ubiquitin protein ligase 4	0.9	The protein encoded by this gene is predicted and it includes two isoforms resulting from two alternatively spliced transcript variants. [provided by RefSeq, Jul 2008]
ENSG00000166681	Endothelial Cell	NGFRAP1	Nerve growth factor receptor (TNFRSF16) associated protein 1	37.5
ENSG00000197696	Endothelial Cell	NMB	Neuromedin B	0.3
ENSG00000163072	Endothelial Cell	NOSTRIN	Nitric oxide synthase trafficking	2.7	Nitric oxide (NO) is a potent mediator in biologic processes such as neurotransmission, inflammatory response, and vascular homeostasis. NOSTRIN binds the enzyme responsible for NO production, endothelial NO synthase (ENOS; MIM 163729), and triggers the translocation of ENOS from the plasma membrane to vesicle-like subcellular structures, thereby attenuating ENOS-dependent NO production.[supplied…
ENSG00000214285	Endothelial Cell	NPS	Neuropeptide S	0
ENSG00000181019	Endothelial Cell	NQO1	NAD(P)H dehydrogenase, quinone 1	1.8	This gene is a member of the NAD(P)H dehydrogenase (quinone) family and encodes a cytoplasmic 2-electron reductase. This FAD-binding protein forms homodimers and reduces quinones to hydroquinones. This protein's enzymatic activity prevents the one electron reduction of quinones that results in the production of radical species. Mutations in this gene have been associated with tardive dyskinesia (…
ENSG00000177463	Endothelial Cell	NR2C2	Nuclear receptor subfamily 2, group C, member 2	2.7	This gene encodes a protein that belongs to the nuclear hormone receptor family. Members of this family act as ligand-activated transcription factors and function in many biological processes such as development, cellular differentiation and homeostasis. The activated receptor/ligand complex is translocated to the nucleus where it binds to hormone response elements of target genes. The protein en…
ENSG00000035681	Endothelial Cell	NSMAF	Neutral sphingomyelinase (N-SMase) activation associated factor	1.9	This gene encodes a WD-repeat protein that binds the cytoplasmic sphingomyelinase activation domain of the 55kD tumor necrosis factor receptor. This protein is required for TNF-mediated activation of neutral sphingomyelinase and may play a role in regulating TNF-induced cellular responses such as inflammation. Alternative splicing results in multiple transcript variants.[provided by RefSeq, Jan 2…
ENSG00000135318	Endothelial Cell	NT5E	5'-nucleotidase, ecto (CD73)	17	The protein encoded by this gene is a plasma membrane protein that catalyzes the conversion of extracellular nucleotides to membrane-permeable nucleosides. The encoded protein is used as a determinant of lymphocyte differentiation. Defects in this gene can lead to the calcification of joints and arteries. Two transcript variants encoding different isoforms have been found for this gene.[provided …
ENSG00000153989	Endothelial Cell	NUS1	Nuclear undecaprenyl pyrophosphate synthase 1 homolog (S. cerevisiae)	9.7
ENSG00000204361	Endothelial Cell + Other Pattern	NXPE2	Neurexophilin and PC-esterase domain family, member 2	0
ENSG00000122584	Endothelial Cell + Other Pattern	NXPH1	Neurexophilin 1	0	This gene is a member of the neurexophilin family and encodes a secreted protein with a variable N-terminal domain, a highly conserved, N-glycosylated central domain, a short linker region, and a cysteine-rich C-terminal domain. This protein forms a very tight complex with alpha neurexins, a group of proteins that promote adhesion between dendrites and axons. [provided by RefSeq, Jul 2008]
ENSG00000124006	Endothelial Cell	OBSL1	Obscurin-like 1	10	Cytoskeletal adaptor proteins function in linking the internal cytoskeleton of cells to the cell membrane. This gene encodes a cytoskeletal adaptor protein, which is a member of the Unc-89/obscurin family. The protein contains multiple N- and C-terminal immunoglobulin (Ig)-like domains and a central fibronectin type 3 domain. Mutations in this gene cause 3M syndrome type 2. Alternatively spliced …
ENSG00000205022	Endothelial Cell	PABPN1L	Poly(A) binding protein, nuclear 1-like (cytoplasmic)	0
ENSG00000076641	Endothelial Cell	PAG1	Phosphoprotein associated with glycosphingolipid microdomains 1	1.7	The protein encoded by this gene is a type III transmembrane adaptor protein that binds to the tyrosine kinase csk protein. It is thought to be involved in the regulation of T cell activation. [provided by RefSeq, Jul 2008]
ENSG00000081853	Endothelial Cell	PCDHGA2	Protocadherin gamma subfamily A, 2	0.4	This gene is a member of the protocadherin gamma gene cluster, one of three related clusters tandemly linked on chromosome five. These gene clusters have an immunoglobulin-like organization, suggesting that a novel mechanism may be involved in their regulation and expression. The gamma gene cluster includes 22 genes divided into 3 subfamilies. Subfamily A contains 12 genes, subfamily B contains 7…
ENSG00000262209	Endothelial Cell	PCDHGB3	Protocadherin gamma subfamily B, 3	0	This gene is a member of the protocadherin gamma gene cluster, one of three related clusters tandemly linked on chromosome five. These gene clusters have an immunoglobulin-like organization, suggesting that a novel mechanism may be involved in their regulation and expression. The gamma gene cluster includes 22 genes divided into 3 subfamilies. Subfamily A contains 12 genes, subfamily B contains 7…
ENSG00000188389	Endothelial Cell	PDCD1	Programmed cell death 1	0.1	This gene encodes a cell surface membrane protein of the immunoglobulin superfamily. This protein is expressed in pro-B-cells and is thought to play a role in their differentiation. In mice, expression of this gene is induced in the thymus when anti-CD3 antibodies are injected and large numbers of thymocytes undergo apoptosis. Mice deficient for this gene bred on a BALB/c background developed dil…
ENSG00000197461	Endothelial Cell	PDGFA	Platelet-derived growth factor alpha polypeptide	2.4	The protein encoded by this gene is a member of the platelet-derived growth factor family. The four members of this family are mitogenic factors for cells of mesenchymal origin and are characterized by a motif of eight cysteines. This gene product can exist either as a homodimer or as a heterodimer with the platelet-derived growth factor beta polypeptide, where the dimers are connected by disulfi…
ENSG00000163218	Endothelial Cell	PGLYRP4	Peptidoglycan recognition protein 4	0	Summary: This gene encodes a peptidoglycan recognition protein, which belongs to the N-acetylmuramoyl-L-alanine amidase 2 family. These proteins are part of the innate immune system and recognize peptidoglycan, a ubiquitous component of bacterial cell walls. This antimicrobial protein binds to murein peptidoglycans of Gram-positive bacteria. [provided by RefSeq, Oct 2014]
ENSG00000196455	Endothelial Cell	PIK3R4	Phosphoinositide-3-kinase, regulatory subunit 4	6.5
ENSG00000174083	Endothelial Cell	PIK3R6	Phosphoinositide-3-kinase, regulatory subunit 6		Phosphoinositide 3-kinase gamma is a lipid kinase that produces the lipid second messenger phosphatidylinositol 3,4,5-trisphosphate. The kinase is composed of a catalytic subunit and one of several regulatory subunits, and is chiefly activated by G protein-coupled receptors. This gene encodes a regulatory subunit, and is distantly related to the phosphoinositide-3-kinase, regulatory subunit 5 gen…
ENSG00000067225	Endothelial Cell + Other Pattern	PKM	Pyruvate kinase, muscle	13.5	This gene encodes a protein involved in glycolysis. The encoded protein is a pyruvate kinase that catalyzes the transfer of a phosphoryl group from phosphoenolpyruvate to ADP, generating ATP and pyruvate. This protein has been shown to interact with thyroid hormone and may mediate cellular metabolic effects induced by thyroid hormones. This protein has been found to bind Opa protein, a bacterial …
ENSG00000188089	Endothelial Cell	PLA2G4E	Phospholipase A2, group IVE	0
ENSG00000197943	Endothelial Cell	PLCG2	Phospholipase C, gamma 2 (phosphatidylinositol-specific)	5.8	The protein encoded by this gene is a transmembrane signaling enzyme that catalyzes the conversion of 1-phosphatidyl-1D-myo-inositol 4,5-bisphosphate to 1D-myo-inositol 1,4,5-trisphosphate (IP3) and diacylglycerol (DAG) using calcium as a cofactor. IP3 and DAG are second messenger molecules important for transmitting signals from growth factor receptors and immune system receptors across the cell…
ENSG00000175895	Endothelial Cell	PLEKHF2	Pleckstrin homology domain containing, family F (with FYVE domain) member 2	5.8
ENSG00000241839	Endothelial Cell	PLEKHO2	Pleckstrin homology domain containing, family O member 2	5.6
ENSG00000128567	Endothelial Cell	PODXL	Podocalyxin-like	0.3	This gene encodes a member of the sialomucin protein family. The encoded protein was originally identified as an important component of glomerular podocytes. Podocytes are highly differentiated epithelial cells with interdigitating foot processes covering the outer aspect of the glomerular basement membrane. Other biological activities of the encoded protein include: binding in a membrane protein…
ENSG00000256525	Endothelial Cell	POLG2	Polymerase (DNA directed), gamma 2, accessory subunit	1.5	This gene encodes the processivity subunit of the mitochondrial DNA polymerase gamma. The encoded protein forms a heterotrimer containing one catalytic subunit and two processivity subunits. This protein enhances DNA binding and promotes processive DNA synthesis. Mutations in this gene result in autosomal dominant progressive external ophthalmoplegia with mitochondrial DNA deletions.[provided by …
ENSG00000110777	Endothelial Cell	POU2AF1	POU class 2 associating factor 1	0.5
ENSG00000127125	Endothelial Cell	PPCS	Phosphopantothenoylcysteine synthetase	34.6	Biosynthesis of coenzyme A (CoA) from pantothenic acid (vitamin B5) is an essential universal pathway in prokaryotes and eukaryotes. PPCS (EC 6.3.2.5), one of the last enzymes in this pathway, converts phosphopantothenate to phosphopantothenoylcysteine (Daugherty et al., 2002 [PubMed 11923312]).[supplied by OMIM, Mar 2008]
ENSG00000100034	Endothelial Cell	PPM1F	Protein phosphatase, Mg2+/Mn2+ dependent, 1F	1	The protein encoded by this gene is a member of the PP2C family of Ser/Thr protein phosphatases. PP2C family members are known to be negative regulators of cell stress response pathways. This phosphatase can interact with Rho guanine nucleotide exchange factors (PIX), and thus block the effects of p21-activated kinase 1 (PAK), a protein kinase mediating biological effects downstream of Rho GTPase…
ENSG00000185532	Endothelial Cell	PRKG1	Protein kinase, cGMP-dependent, type I	0.8	Mammals have three different isoforms of cyclic GMP-dependent protein kinase (Ialpha, Ibeta, and II). These PRKG isoforms act as key mediators of the nitric oxide/cGMP signaling pathway and are important components of many signal transduction processes in diverse cell types. This PRKG1 gene on human chromosome 10 encodes the soluble Ialpha and Ibeta isoforms of PRKG by alternative transcript spli…
ENSG00000224940	Endothelial Cell	PRRT4	Proline-rich transmembrane protein 4	0
ENSG00000196415	Endothelial Cell + Other Pattern	PRTN3	Proteinase 3	0.2
ENSG00000179295	Endothelial Cell + Other Pattern	PTPN11	Protein tyrosine phosphatase, non-receptor type 11	17.7	The protein encoded by this gene is a member of the protein tyrosine phosphatase (PTP) family. PTPs are known to be signaling molecules that regulate a variety of cellular processes including cell growth, differentiation, mitotic cycle, and oncogenic transformation. This PTP contains two tandem Src homology-2 domains, which function as phospho-tyrosine binding domains and mediate the interaction …
ENSG00000152894	Endothelial Cell	PTPRK	Protein tyrosine phosphatase, receptor type, K	13.9	The protein encoded by this gene is a member of the protein tyrosine phosphatase (PTP) family. PTPs are known to be signaling molecules that regulate a variety of cellular processes including cell growth, differentiation, mitotic cycle, and oncogenic transformation. This PTP possesses an extracellular region, a single transmembrane region, and two tandem catalytic domains, and thus represents a r…
ENSG00000177469	Endothelial Cell	PTRF	Polymerase I and transcript release factor	11.3	This gene encodes a protein that enables the dissociation of paused ternary polymerase I transcription complexes from the 3' end of pre-rRNA transcripts. This protein regulates rRNA transcription by promoting the dissociation of transcription complexes and the reinitiation of polymerase I on nascent rRNA transcripts. This protein also localizes to caveolae at the plasma membrane and is thought to…
ENSG00000089159	Endothelial Cell	PXN	Paxillin	6.9	This gene encodes a cytoskeletal protein involved in actin-membrane attachment at sites of cell adhesion to the extracellular matrix (focal adhesion). Alternatively spliced transcript variants encoding different isoforms have been described for this gene. These isoforms exhibit different expression pattern, and have different biochemical, as well as physiological properties (PMID:9054445). [provi…
ENSG00000152932	Endothelial Cell	RAB3C	RAB3C, member RAS oncogene family	0	RAB proteins, such as RAB3C, are small GTPases implicated in the regulation of vesicular trafficking between membrane compartments (Cheng et al., 2002 [PubMed 12296628]).[supplied by OMIM, Jun 2009]
ENSG00000198915	Endothelial Cell	RASGEF1A	RasGEF domain family, member 1A	0
ENSG00000203867	Endothelial Cell	RBM20	RNA binding motif protein 20	0	This gene encodes a protein that binds RNA and regulates splicing. Mutations in this gene have been associated with familial dilated cardiomyopathy. [provided by RefSeq, Apr 2014]
ENSG00000114115	Endothelial Cell	RBP1	Retinol binding protein 1, cellular	64.9	This gene encodes the carrier protein involved in the transport of retinol (vitamin A alcohol) from the liver storage site to peripheral tissue. Vitamin A is a fat-soluble vitamin necessary for growth, reproduction, differentiation of epithelial tissues, and vision. Multiple transcript variants encoding different isoforms have been found for this gene. [provided by RefSeq, Aug 2008]
ENSG00000122707	Endothelial Cell	RECK	Reversion-inducing-cysteine-rich protein with kazal motifs	2.2	The protein encoded by this gene is a cysteine-rich, extracellular protein with protease inhibitor-like domains whose expression is suppressed strongly in many tumors and cells transformed by various kinds of oncogenes. In normal cells, this membrane-anchored glycoprotein may serve as a negative regulator for matrix metalloproteinase-9, a key enzyme involved in tumor invasion and metastasis. [pro…
ENSG00000088320	Endothelial Cell + Other Pattern	REM1	RAS (RAD and GEM)-like GTP-binding 1	0	The protein encoded by this gene is a GTPase and member of the RAS-like GTP-binding protein family. The encoded protein is expressed in endothelial cells, where it promotes reorganization of the actin cytoskeleton and morphological changes in the cells. [provided by RefSeq, Jul 2008]
ENSG00000143878	Endothelial Cell	RHOB	Ras homolog family member B	308.5
ENSG00000141576	Endothelial Cell + Other Pattern	RNF157	Ring finger protein 157	0.2
ENSG00000189050	Endothelial Cell	RNFT1	Ring finger protein, transmembrane 1	4.6
ENSG00000272896	Endothelial Cell	RP11-216L13.17
ENSG00000179673	Endothelial Cell	RPRML	Reprimo-like	0
ENSG00000013392	Endothelial Cell	RWDD2A	RWD domain containing 2A	1.3
ENSG00000163785	Endothelial Cell	RYK	Receptor-like tyrosine kinase	7	The protein encoded by this gene is an atypical member of the family of growth factor receptor protein tyrosine kinases, differing from other members at a number of conserved residues in the activation and nucleotide binding domains. This gene product belongs to a subfamily whose members do not appear to be regulated by phosphorylation in the activation segment. It has been suggested that mediati…
ENSG00000197747	Endothelial Cell	S100A10	S100 calcium binding protein A10	58.5	The protein encoded by this gene is a member of the S100 family of proteins containing 2 EF-hand calcium-binding motifs. S100 proteins are localized in the cytoplasm and/or nucleus of a wide range of cells, and involved in the regulation of a number of cellular processes such as cell cycle progression and differentiation. S100 genes include at least 13 members which are located as a cluster on ch…
ENSG00000170989	Endothelial Cell	S1PR1	Sphingosine-1-phosphate receptor 1	12.1	The protein encoded by this gene is structurally similar to G protein-coupled receptors and is highly expressed in endothelial cells. It binds the ligand sphingosine-1-phosphate with high affinity and high specificity, and suggested to be involved in the processes that regulate the differentiation of endothelial cells. Activation of this receptor induces cell-cell adhesion. [provided by RefSeq, J…
ENSG00000115884	Endothelial Cell	SDC1	Syndecan 1	147.1	The protein encoded by this gene is a transmembrane (type I) heparan sulfate proteoglycan and is a member of the syndecan proteoglycan family. The syndecans mediate cell binding, cell signaling, and cytoskeletal organization and syndecan receptors are required for internalization of the HIV-1 tat protein. The syndecan-1 protein functions as an integral membrane protein and participates in cell pr…
ENSG00000168497	Endothelial Cell	SDPR	Serum deprivation response	8.4	This gene encodes a calcium-independent phospholipid-binding protein whose expression increases in serum-starved cells. This protein is a substrate for protein kinase C (PKC) phosphorylation and recruits polymerase I and transcript release factor (PTRF) to caveolae. Removal of this protein causes caveolae loss and its over-expression results in caveolae deformation and membrane tubulation.[provid…
ENSG00000198832	Endothelial Cell	SELM	Selenoprotein M	4.1	This gene encodes a selenoprotein, which contains a selenocysteine (Sec) residue at its active site. The selenocysteine is encoded by the UGA codon that normally signals translation termination. The 3' UTR of selenoprotein genes have a common stem-loop structure, the sec insertion sequence (SECIS), that is necessary for the recognition of UGA as a Sec codon rather than as a stop signal. This gene…
ENSG00000124570	Endothelial Cell	SERPINB6	Serpin peptidase inhibitor, clade B (ovalbumin), member 6	20.3	The protein encoded by this gene is a member of the serpin (serine proteinase inhibitor) superfamily, and ovalbumin(ov)-serpin subfamily. It was originally discovered as a placental thrombin inhibitor. The mouse homolog was found to be expressed in the hair cells of the inner ear. Mutations in this gene are associated with nonsyndromic progressive hearing loss, suggesting that this serpin plays a…
ENSG00000149257	Endothelial Cell	SERPINH1	Serpin peptidase inhibitor, clade H (heat shock protein 47), member 1, (collagen binding protein 1)	17.9	This gene encodes a member of the serpin superfamily of serine proteinase inhibitors. The encoded protein is localized to the endoplasmic reticulum and plays a role in collagen biosynthesis as a collagen-specific molecular chaperone. Autoantibodies to the encoded protein have been found in patients with rheumatoid arthritis. Expression of this gene may be a marker for cancer, and nucleotide polym…
ENSG00000109686	Endothelial Cell	SH3D19	SH3 domain containing 19	18.7	This gene encodes a multiple SH3 domain-containing protein, which interacts with other proteins, such as EBP and members of ADAM family, via the SH3 domains. This protein may be involved in suppression of Ras-induced cellular transformation and Ras-mediated activation of ELK1 by EBP, and regulation of ADAM proteins in the signaling of EGFR-ligand shedding. Alternatively spliced transcript variant…
ENSG00000162383	Endothelial Cell + Other Pattern	SLC1A7	Solute carrier family 1 (glutamate transporter), member 7	0.4
ENSG00000163393	Endothelial Cell	SLC22A15	Solute carrier family 22, member 15	0	Organic ion transporters, such as SLC22A15, transport various medically and physiologically important compounds, including pharmaceuticals, toxins, hormones, neurotransmitters, and cellular metabolites. These transporters are also referred to as amphiphilic solute facilitators (ASFs).[supplied by OMIM, Apr 2004]
ENSG00000162695	Endothelial Cell	SLC30A7	Solute carrier family 30 (zinc transporter), member 7	4.5	Zinc functions as a cofactor for numerous enzymes, nuclear factors, and hormones and as an intra- and intercellular signal ion. Members of the zinc transporter (ZNT)/SLC30 subfamily of the cation diffusion facilitator family, such as SLC30A7, permit cellular efflux of zinc (Seve et al., 2004 [PubMed 15154973]).[supplied by OMIM, Mar 2008]
ENSG00000184564	Endothelial Cell	SLITRK6	SLIT and NTRK-like family, member 6	0.2	This gene encodes a member of the SLITRK protein family. Members of this family are integral membrane proteins that are characterized by two N-terminal leucine-rich repeat (LRR) domains and a C-terminal region that shares homology with trk neurotrophin receptors. This protein functions as a regulator of neurite outgrowth required for normal hearing and vision. Mutations in this gene are a cause o…
ENSG00000198742	Endothelial Cell	SMURF1	SMAD specific E3 ubiquitin protein ligase 1	3.6	This gene encodes a ubiquitin ligase that is specific for receptor-regulated SMAD proteins in the bone morphogenetic protein (BMP) pathway. This protein plays a key roll in the regulation of cell motility, cell signalling, and cell polarity. Alternative splicing results in multiple transcript variants encoding different isoforms.[provided by RefSeq, Dec 2010]
ENSG00000092531	Endothelial Cell	SNAP23	Synaptosomal-associated protein, 23kDa	13.5	Specificity of vesicular transport is regulated, in part, by the interaction of a vesicle-associated membrane protein termed synaptobrevin/VAMP with a target compartment membrane protein termed syntaxin. These proteins, together with SNAP25 (synaptosome-associated protein of 25 kDa), form a complex which serves as a binding site for the general membrane fusion machinery. Synaptobrevin/VAMP and sy…
ENSG00000205302	Endothelial Cell	SNX2	Sorting nexin 2	21.8	This gene belongs to the sorting nexin family whose members contain the phosphoinositide-binding phox (PX) domain. The encoded protein is a component of the retromer complex which plays a role in protein sorting in the endocytic pathway. This protein may form oligomeric complexes with other family members. Alternate splicing results in multiple transcript variants of this gene. Pseudogenes associ…
ENSG00000180008	Endothelial Cell	SOCS4	Suppressor of cytokine signaling 4	1.9	The protein encoded by this gene contains a SH2 domain and a SOCS BOX domain. The protein thus belongs to the suppressor of cytokine signaling (SOCS), also known as STAT-induced STAT inhibitor (SSI), protein family. SOCS family members are known to be cytokine-inducible negative regulators of cytokine signaling. Two alternatively spliced transcript variants encoding the same protein have been fou…
ENSG00000184361	Endothelial Cell	SPATA32	Spermatogenesis associated 32	0
ENSG00000183318	Endothelial Cell	SPDYE4	Speedy/RINGO cell cycle regulator family member E4	0
ENSG00000147059	Endothelial Cell	SPIN2A	Spindlin family, member 2A	0.3	This gene encodes one of three members of the DXF34 gene family, located in a 100-kb region of chromosome Xp11.21. [provided by RefSeq, Nov 2009]
ENSG00000197694	Endothelial Cell	SPTAN1	Spectrin, alpha, non-erythrocytic 1	12.6	Spectrins are a family of filamentous cytoskeletal proteins that function as essential scaffold proteins that stabilize the plasma membrane and organize intracellular organelles. Spectrins are composed of alpha and beta dimers that associate to form tetramers linked in a head-to-head arrangement. This gene encodes an alpha spectrin that is specifically expressed in nonerythrocytic cells. The enco…
ENSG00000090054	Endothelial Cell	SPTLC1	Serine palmitoyltransferase, long chain base subunit 1	7.5	This gene encodes a member of the class-II pyridoxal-phosphate-dependent aminotransferase family. The encoded protein is the long chain base subunit 1 of serine palmitoyltransferase. Serine palmitoyltransferase converts L-serine and palmitoyl-CoA to 3-oxosphinganine with pyridoxal 5'-phosphate and is the key enzyme in sphingolipid biosynthesis. Mutations in this gene were identified in patients w…
ENSG00000172830	Endothelial Cell	SSH3	Slingshot protein phosphatase 3	1.6	The ADF (actin-depolymerizing factor)/cofilin family (see MIM 601442) is composed of stimulus-responsive mediators of actin dynamics. ADF/cofilin proteins are inactivated by kinases such as LIM domain kinase-1 (LIMK1; MIM 601329). The SSH family appears to play a role in actin dynamics by reactivating ADF/cofilin proteins in vivo (Niwa et al., 2002 [PubMed 11832213]).[supplied by OMIM, Mar 2008]
ENSG00000157350	Endothelial Cell	ST3GAL2	ST3 beta-galactoside alpha-2,3-sialyltransferase 2	1.3	The protein encoded by this gene is a type II membrane protein that catalyzes the transfer of sialic acid from CMP-sialic acid to galactose-containing substrates. The encoded protein is normally found in the Golgi but can be proteolytically processed to a soluble form. This protein, which is a member of glycosyltransferase family 29, can use the same acceptor substrates as does sialyltransferase …
ENSG00000117632	Endothelial Cell + Other Pattern	STMN1	Stathmin 1	17.4	This gene belongs to the stathmin family of genes. It encodes a ubiquitous cytosolic phosphoprotein proposed to function as an intracellular relay integrating regulatory signals of the cellular environment. The encoded protein is involved in the regulation of the microtubule filament system by destabilizing microtubules. It prevents assembly and promotes disassembly of microtubules. Multiple tran…
ENSG00000135604	Endothelial Cell	STX11	Syntaxin 11	2.4	This gene encodes a member of the syntaxin family. Syntaxins have been implicated in the targeting and fusion of intracellular transport vesicles. This family member may regulate protein transport among late endosomes and the trans-Golgi network. Mutations in this gene have been associated with familial hemophagocytic lymphohistiocytosis. [provided by RefSeq, Jul 2008]
ENSG00000103496	Endothelial Cell	STX4	Syntaxin 4	12.9
ENSG00000196228	Endothelial Cell	SULT1C3	Sulfotransferase family, cytosolic, 1C, member 3	0
ENSG00000099994	Endothelial Cell	SUSD2	Sushi domain containing 2	0.7
ENSG00000172403	Endothelial Cell	SYNPO2	Synaptopodin 2	5.3
ENSG00000166317	Endothelial Cell	SYNPO2L	Synaptopodin 2-like	0
ENSG00000231925	Endothelial Cell + Other Pattern	TAPBP	TAP binding protein (tapasin)	29.1	This gene encodes a transmembrane glycoprotein which mediates interaction between newly assembled major histocompatibility complex (MHC) class I molecules and the transporter associated with antigen processing (TAP), which is required for the transport of antigenic peptides across the endoplasmic reticulum membrane. This interaction is essential for optimal peptide loading on the MHC class I mole…
ENSG00000169962	Endothelial Cell	TAS1R3	Taste receptor, type 1, member 3	0	The TAS1R3 gene encodes the human homolog of mouse Sac, a major determinant of differences between sweet-sensitive and -insensitive mouse strains in their responsiveness to sucrose, saccharine, and other sweeteners (Max et al., 2001 [PubMed 11326277]).[supplied by OMIM, Jan 2010]
ENSG00000167202	Endothelial Cell	TBC1D2B	TBC1 domain family, member 2B	5.5
ENSG00000176148	Endothelial Cell	TCP11L1	T-complex 11, testis-specific-like 1	1.8
ENSG00000120708	Endothelial Cell	TGFBI	Transforming growth factor, beta-induced, 68kDa	59.2	This gene encodes an RGD-containing protein that binds to type I, II and IV collagens. The RGD motif is found in many extracellular matrix proteins modulating cell adhesion and serves as a ligand recognition sequence for several integrins. This protein plays a role in cell-collagen interactions and may be involved in endochondrial bone formation in cartilage. The protein is induced by transformin…
ENSG00000198959	Endothelial Cell + Other Pattern	TGM2	Transglutaminase 2	19.6	Transglutaminases are enzymes that catalyze the crosslinking of proteins by epsilon-gamma glutamyl lysine isopeptide bonds. While the primary structure of transglutaminases is not conserved, they all have the same amino acid sequence at their active sites and their activity is calcium-dependent. The protein encoded by this gene acts as a monomer, is induced by retinoic acid, and appears to be inv…
ENSG00000178726	Endothelial Cell	THBD	Thrombomodulin	4.3	The protein encoded by this intronless gene is an endothelial-specific type I membrane receptor that binds thrombin. This binding results in the activation of protein C, which degrades clotting factors Va and VIIIa and reduces the amount of thrombin generated. Mutations in this gene are a cause of thromboembolic disease, also known as inherited thrombophilia. [provided by RefSeq, Jul 2008]
ENSG00000221995	Endothelial Cell	TIAF1	TGFB1-induced anti-apoptotic factor 1	0.4
ENSG00000142910	Endothelial Cell	TINAGL1	Tubulointerstitial nephritis antigen-like 1	7.7	The protein encoded by this gene is similar in sequence to tubulointerstitial nephritis antigen, a secreted glycoprotein that is recognized by antibodies in some types of immune-related tubulointerstitial nephritis. Three transcript variants encoding different isoforms have been found for this gene. [provided by RefSeq, Feb 2011]
ENSG00000137076	Endothelial Cell	TLN1	Talin 1	12.8	This gene encodes a cytoskeletal protein that is concentrated in areas of cell-substratum and cell-cell contacts. The encoded protein plays a significant role in the assembly of actin filaments and in spreading and migration of various cell types, including fibroblasts and osteoclasts. It codistributes with integrins in the cell surface membrane in order to assist in the attachment of adherent ce…
ENSG00000250349	Endothelial Cell	TM4SF2	Uncharacterized protein; cDNA FLJ59144, highly similar to Tetraspanin-7	0
ENSG00000184497	Endothelial Cell	TMEM255B	Transmembrane protein 255B	0.8
ENSG00000196932	Endothelial Cell	TMEM26	Transmembrane protein 26	0.6
ENSG00000170876	Endothelial Cell	TMEM43	Transmembrane protein 43	7.1	This gene belongs to the TMEM43 family. Defects in this gene are the cause of familial arrhythmogenic right ventricular dysplasia type 5 (ARVD5), also known as arrhythmogenic right ventricular cardiomyopathy type 5 (ARVC5). Arrhythmogenic right ventricular dysplasia is an inherited disorder, often involving both ventricles, and is characterized by ventricular tachycardia, heart failure, sudden ca…
ENSG00000138594	Endothelial Cell + Other Pattern	TMOD3	Tropomodulin 3 (ubiquitous)	8.5
ENSG00000179104	Endothelial Cell	TMTC2	Transmembrane and tetratricopeptide repeat containing 2	0.2
ENSG00000125247	Endothelial Cell	TMTC4	Transmembrane and tetratricopeptide repeat containing 4	3.8
ENSG00000232810	Endothelial Cell + Other Pattern	TNF	Tumor necrosis factor	0.5	This gene encodes a multifunctional proinflammatory cytokine that belongs to the tumor necrosis factor (TNF) superfamily. This cytokine is mainly secreted by macrophages. It can bind to, and thus functions through its receptors TNFRSF1A/TNFR1 and TNFRSF1B/TNFBR. This cytokine is involved in the regulation of a wide spectrum of biological processes including cell proliferation, differentiation, ap…
ENSG00000185215	Endothelial Cell	TNFAIP2	Tumor necrosis factor, alpha-induced protein 2	12.2	This gene was identified as a gene whose expression can be induced by the tumor necrosis factor alpha (TNF) in umbilical vein endothelial cells. The expression of this gene was shown to be induced by retinoic acid in a cell line expressing a oncogenic version of the retinoic acid receptor alpha fusion protein, which suggested that this gene may be a retinoic acid target gene in acute promyelocyti…
ENSG00000157873	Endothelial Cell	TNFRSF14	Tumor necrosis factor receptor superfamily, member 14	10.2	This gene encodes a member of the TNF (tumor necrosis factor) receptor superfamily. The encoded protein functions in signal transduction pathways that activate inflammatory and inhibitory T-cell immune response. It binds herpes simplex virus (HSV) viral envelope glycoprotein D (gD), mediating its entry into cells. Alternative splicing results in multiple transcript variants. [provided by RefSeq, …
ENSG00000120332	Endothelial Cell	TNN	Tenascin N	0.5
ENSG00000136205	Endothelial Cell	TNS3	Tensin 3	13
ENSG00000196511	Endothelial Cell + Other Pattern	TPK1	Thiamin pyrophosphokinase 1	2	This gene encodes a protein, that exists as a homodimer, which catalyzes the conversion of thiamine to thiamine pyrophosphate. Alternate transcriptional splice variants, encoding different isoforms, have been characterized. [provided by RefSeq, Jul 2008]
ENSG00000116176	Endothelial Cell	TPSG1	Tryptase gamma 1	0	Tryptases comprise a family of trypsin-like serine proteases, the peptidase family S1. Tryptases are enzymatically active only as heparin-stabilized tetramers, and they are resistant to all known endogenous proteinase inhibitors. Several tryptase genes are clustered on chromosome 16p13.3. There is uncertainty regarding the number of genes in this cluster. Currently four functional genes - alpha I…
ENSG00000185880	Endothelial Cell	TRIM69	Tripartite motif containing 69	0.4	This gene encodes a member of the RING-B-box-coiled-coil (RBCC) family and encodes a protein with an N-terminal RING finger motif, a PRY domain and a C-terminal SPRY domain. The mouse ortholog of this gene is specifically expressed in germ cells at the round spermatid stages during spermatogenesis and, when overexpressed, induces apoptosis. Alternatively spliced transcript variants encoding disti…
ENSG00000156298	Endothelial Cell	TSPAN7	Tetraspanin 7	9.8	The protein encoded by this gene is a member of the transmembrane 4 superfamily, also known as the tetraspanin family. Most of these members are cell-surface proteins that are characterized by the presence of four hydrophobic domains. The proteins mediate signal transduction events that play a role in the regulation of cell development, activation, growth and motility. This encoded protein is a c…
ENSG00000100300	Endothelial Cell	TSPO	Translocator protein (18kDa)	7.2	Present mainly in the mitochondrial compartment of peripheral tissues, the protein encoded by this gene interacts with some benzodiazepines and has different affinities than its endogenous counterpart. The protein is a key factor in the flow of cholesterol into mitochondria to permit the initiation of steroid hormone synthesis. Alternatively spliced transcript variants have been reported; one of …
ENSG00000171928	Endothelial Cell	TVP23B	Trans-golgi network vesicle protein 23 homolog B (S. cerevisiae)	15.3
ENSG00000175106	Endothelial Cell	TVP23C	Trans-golgi network vesicle protein 23 homolog C (S. cerevisiae)	2.7
ENSG00000025708	Endothelial Cell	TYMP	Thymidine phosphorylase	13.7	This gene encodes an angiogenic factor which promotes angiogenesis in vivo and stimulates the in vitro growth of a variety of endothelial cells. It has a highly restricted target cell specificity acting only on endothelial cells. Mutations in this gene have been associated with mitochondrial neurogastrointestinal encephalomyopathy. Multiple alternatively spliced transcript variants have been iden…
ENSG00000165886	Endothelial Cell	UBTD1	Ubiquitin domain containing 1	2.2	The degradation of many proteins is carried out by the ubiquitin pathway in which proteins are targeted for degradation by covalent conjugation of the polypeptide ubiquitin. This gene encodes a protein that belongs to the ubiquitin family of proteins. The encoded protein is thought to regulate E2 ubiquitin conjugating enzymes belonging to the UBE2D family. [provided by RefSeq, Mar 2014]
ENSG00000253797	Endothelial Cell	UTP14C	UTP14, U3 small nucleolar ribonucleoprotein, homolog C (yeast)	5.9
ENSG00000152818	Endothelial Cell	UTRN	Utrophin	10.1	This gene shares both structural and functional similarities with the dystrophin gene. It contains an actin-binding N-terminus, a triple coiled-coil repeat central region, and a C-terminus that consists of protein-protein interaction motifs which interact with dystroglycan protein components. The protein encoded by this gene is located at the neuromuscular synapse and myotendinous junctions, wher…
ENSG00000125753	Endothelial Cell + Other Pattern	VASP	Vasodilator-stimulated phosphoprotein	6.3	Vasodilator-stimulated phosphoprotein (VASP) is a member of the Ena-VASP protein family. Ena-VASP family members contain an EHV1 N-terminal domain that binds proteins containing E/DFPPPPXD/E motifs and targets Ena-VASP proteins to focal adhesions. In the mid-region of the protein, family members have a proline-rich domain that binds SH3 and WW domain-containing proteins. Their C-terminal EVH2 dom…
ENSG00000108828	Endothelial Cell + Other Pattern	VAT1	Vesicle amine transport 1	18.2	Synaptic vesicles are responsible for regulating the storage and release of neurotransmitters in the nerve terminal. The protein encoded by this gene is an abundant integral membrane protein of cholinergic synaptic vesicles and is thought to be involved in vesicular transport. It belongs to the quinone oxidoreductase subfamily of zinc-containing alcohol dehydrogenase proteins. [provided by RefSeq…
ENSG00000162692	Endothelial Cell	VCAM1	Vascular cell adhesion molecule 1	13.7	This gene is a member of the Ig superfamily and encodes a cell surface sialoglycoprotein expressed by cytokine-activated endothelium. This type I membrane protein mediates leukocyte-endothelial cell adhesion and signal transduction, and may play a role in the development of artherosclerosis and rheumatoid arthritis. Three alternatively spliced transcripts encoding different isoforms have been des…
ENSG00000026025	Endothelial Cell + Other Pattern	VIM	Vimentin	87.2	This gene encodes a member of the intermediate filament family. Intermediate filamentents, along with microtubules and actin microfilaments, make up the cytoskeleton. The protein encoded by this gene is responsible for maintaining cell shape, integrity of the cytoplasm, and stabilizing cytoskeletal interactions. It is also involved in the immune response, and controls the transport of low-density…
ENSG00000106018	Endothelial Cell	VIPR2	Vasoactive intestinal peptide receptor 2	0	This gene encodes a receptor for vasoactive intestinal peptide, a small neuropeptide. Vasoactive intestinal peptide is involved in smooth muscle relaxation, exocrine and endocrine secretion, and water and ion flux in lung and intestinal epithelia. Its actions are effected through integral membrane receptors associated with a guanine nucleotide binding protein which activates adenylate cyclase. [p…
ENSG00000122958	Endothelial Cell	VPS26A	Vacuolar protein sorting 26 homolog A (S. pombe)	13	This gene belongs to a group of vacuolar protein sorting (VPS) genes. The encoded protein is a component of a large multimeric complex, termed the retromer complex, involved in retrograde transport of proteins from endosomes to the trans-Golgi network. The close structural similarity between the yeast and human proteins that make up this complex suggests a similarity in function. Expression studi…
ENSG00000110799	Endothelial Cell	VWF	Von Willebrand factor	0.9	The glycoprotein encoded by this gene functions as both an antihemophilic factor carrier and a platelet-vessel wall mediator in the blood coagulation system. It is crucial to the hemostasis process. Mutations in this gene or deficiencies in this protein result in von Willebrand's disease. An unprocessed pseudogene has been found on chromosome 22. [provided by RefSeq, Jul 2008]
ENSG00000163625	Endothelial Cell	WDFY3	WD repeat and FYVE domain containing 3	2.4	This gene encodes a phosphatidylinositol 3-phosphate-binding protein that functions as a master conductor for aggregate clearance by autophagy. This protein shuttles from the nuclear membrane to colocalize with aggregated proteins, where it complexes with other autophagic components to achieve macroautophagy-mediated clearance of these aggregated proteins. However, it is not necessary for starvat…
ENSG00000142784	Endothelial Cell	WDTC1	WD and tetratricopeptide repeats 1	3.4
ENSG00000184937	Endothelial Cell	WT1	Wilms tumor 1	0	This gene encodes a transcription factor that contains four zinc-finger motifs at the C-terminus and a proline/glutamine-rich DNA-binding domain at the N-terminus. It has an essential role in the normal development of the urogenital system, and it is mutated in a small subset of patients with Wilm's tumors. This gene exhibits complex tissue-specific and polymorphic imprinting pattern, with bialle…
ENSG00000134684	Endothelial Cell + Other Pattern	YARS	Tyrosyl-tRNA synthetase	17.6	Aminoacyl-tRNA synthetases catalyze the aminoacylation of tRNA by their cognate amino acid. Because of their central role in linking amino acids with nucleotide triplets contained in tRNAs, aminoacyl-tRNA synthetases are thought to be among the first proteins that appeared in evolution. Tyrosyl-tRNA synthetase belongs to the class I tRNA synthetase family. Cytokine activities have also been obser…
ENSG00000169155	Endothelial Cell	ZBTB43	Zinc finger and BTB domain containing 43	2.8
ENSG00000176261	Endothelial Cell + Other Pattern	ZBTB8OS	Zinc finger and BTB domain containing 8 opposite strand	11.8
ENSG00000023041	Endothelial Cell	ZDHHC6	Zinc finger, DHHC-type containing 6	9.8
ENSG00000185650	Endothelial Cell	ZFP36L1	ZFP36 ring finger protein-like 1	120	This gene is a member of the TIS11 family of early response genes, which are induced by various agonists such as the phorbol ester TPA and the polypeptide mitogen EGF. This gene is well conserved across species and has a promoter that contains motifs seen in other early-response genes. The encoded protein contains a distinguishing putative zinc finger domain with a repeating cys-his motif. This p…
ENSG00000159733	Endothelial Cell	ZFYVE28	Zinc finger, FYVE domain containing 28	0.8
ENSG00000197937	Endothelial Cell	ZNF347	Zinc finger protein 347	0.6
ENSG00000186812	Endothelial Cell	ZNF397	Zinc finger protein 397	2.8	This gene encodes a protein with a N-terminal SCAN domain, and the longer isoform contains nine C2H2-type zinc finger repeats in the C-terminal domain. The protein localizes to centromeres during interphase and early prophase, and different isoforms can repress or activate transcription in transfection studies. Multiple transcript variants encoding different isoforms have been found for this gene…
ENSG00000156853	Endothelial Cell + Other Pattern	ZNF689	Zinc finger protein 689	1.6
ENSG00000151612	Endothelial Cell	ZNF827	Zinc finger protein 827	0.2
ENSG00000196605	Endothelial Cell	ZNF846	Zinc finger protein 846	1.3

## Sheet: Table S-3
ENSG ID	Expression Pattern	Gene Symbol	Gene Name	FPKM	Info
ENSG00000177674	Lymphocyte	AGTRAP	Angiotensin II receptor-associated protein	4.8	This gene encodes a transmembrane protein localized to the plasma membrane and perinuclear vesicular structures. The gene product interacts with the angiotensin II type I receptor and negatively regulates angiotensin II signaling. Alternative splicing of this gene generates multiple transcript variants encoding different isoforms. [provided by RefSeq, Jul 2008]
ENSG00000181754	Lymphocyte	AMIGO1	Adhesion molecule with Ig-like domain 1	0.7
ENSG00000133805	Lymphocyte	AMPD3	Adenosine monophosphate deaminase 3	0.6	This gene encodes a member of the AMP deaminase gene family. The encoded protein is a highly regulated enzyme that catalyzes the hydrolytic deamination of adenosine monophosphate to inosine monophosphate, a branch point in the adenylate catabolic pathway. This gene encodes the erythrocyte (E) isoforms, whereas other family members encode isoforms that predominate in muscle (M) and liver (L) cells…
ENSG00000239713	Lymphocyte	APOBEC3G	Apolipoprotein B mRNA editing enzyme, catalytic polypeptide-like 3G	1.5	This gene is a member of the cytidine deaminase gene family. It is one of seven related genes or pseudogenes found in a cluster, thought to result from gene duplication, on chromosome 22. Members of the cluster encode proteins that are structurally and functionally related to the C to U RNA-editing cytidine deaminase APOBEC1. It is thought that the proteins may be RNA editing enzymes and have rol…
ENSG00000184730	Lymphocyte	APOBR	Apolipoprotein B receptor	1.6	Apolipoprotein B48 receptor is a macrophage receptor that binds to the apolipoprotein B48 of dietary triglyceride (TG)-rich lipoproteins. This receptor may provide essential lipids, lipid-soluble vitamins and other nutrients to reticuloendothelial cells. If overwhelmed with elevated plasma triglyceride, the apolipoprotein B48 receptor may contribute to foam cell formation, endothelial dysfunction…
ENSG00000165272	Lymphocyte	AQP3	Aquaporin 3 (Gill blood group)	36.6	This gene encodes the water channel protein aquaporin 3. Aquaporins are a family of small integral membrane proteins related to the major intrinsic protein, also known as aquaporin 0. Aquaporin 3 is localized at the basal lateral membranes of collecting duct cells in the kidney. In addition to its water channel function, aquaporin 3 has been found to facilitate the transport of nonionic small sol…
ENSG00000171791	Lymphocyte	BCL2	B-cell CLL/lymphoma 2	0.9	This gene encodes an integral outer mitochondrial membrane protein that blocks the apoptotic death of some cells such as lymphocytes. Constitutive expression of BCL2, such as in the case of translocation of BCL2 to Ig heavy chain locus, is thought to be the cause of follicular lymphoma. Two transcript variants, produced by alternate splicing, differ in their C-terminal ends. [provided by RefSeq, …
ENSG00000029363	Lymphocyte	BCLAF1	BCL2-associated transcription factor 1	2.2	This gene encodes a transcriptional repressor that interacts with several members of the BCL2 family of proteins. Overexpression of this protein induces apoptosis, which can be suppressed by co-expression of BCL2 proteins. The protein localizes to dot-like structures throughout the nucleus, and redistributes to a zone near the nuclear envelope in cells undergoing apoptosis. Multiple transcript va…
ENSG00000100290	Lymphocyte	BIK	BCL2-interacting killer (apoptosis-inducing)	0	The protein encoded by this gene shares a critical BH3 domain with other death-promoting proteins, such as BID, BAK, BAD and BAX, that is required for its pro-apoptotic activity, and for interaction with anti-apoptotic members of the BCL2 family, and viral survival-promoting proteins. Since the activity of this protein is suppressed in the presence of survival-promoting proteins, it is suggested …
ENSG00000110934	Lymphocyte	BIN2	Bridging integrator 2	2.7
ENSG00000101425	Lymphocyte	BPI	Bactericidal/permeability-increasing protein	0.2	This gene encodes a lipopolysaccharide binding protein. It is associated with human neutrophil granules and has antimicrobial activity against gram-negative organisms. [provided by RefSeq, Nov 2014]
ENSG00000183019	Lymphocyte	C19orf59	Chromosome 19 open reading frame 59	0.4	This gene encodes a single-pass transmembrane protein. Based on its expression pattern, it is speculated to be involved in regulating mast cell differentiation or immune responses. [provided by RefSeq, Jul 2008]
ENSG00000148362	Lymphocyte	C9orf142	Chromosome 9 open reading frame 142	3.4
ENSG00000107443	Lymphocyte	CCNJ	Cyclin J	1
ENSG00000177455	Lymphocyte	CD19	CD19 molecule	0	Lymphocytes proliferate and differentiate in response to various concentrations of different antigens. The ability of the B cell to respond in a specific, yet sensitive manner to the various antigens is achieved with the use of low-affinity antigen receptors. This gene encodes a cell surface molecule which assembles with the antigen receptor of B lymphocytes in order to decrease the threshold for…
ENSG00000116824	Lymphocyte	CD2	CD2 molecule	2.1	CD2 is a surface antigen of the human T-lymphocyte lineage that is expressed on all peripheral blood T cells (summarized by Sewell et al., 1986 [PubMed 3490670]). It is one of the earliest T-cell markers, being present on more than 95% of thymocytes; it is also found on some natural killer cells but not on B lymphocytes. Monoclonal antibodies directed against CD2 inhibit the formation of rosettes…
ENSG00000198821	Lymphocyte	CD247	CD247 molecule	2.4	The protein encoded by this gene is T-cell receptor zeta, which together with T-cell receptor alpha/beta and gamma/delta heterodimers, and with CD3-gamma, -delta and -epsilon, forms the T-cell receptor-CD3 complex. The zeta chain plays an important role in coupling antigen recognition to several intracellular signal-transduction pathways. Low expression of the antigen results in impaired immune r…
ENSG00000198087	Lymphocyte	CD2AP	CD2-associated protein	8.4	This gene encodes a scaffolding molecule that regulates the actin cytoskeleton. The protein directly interacts with filamentous actin and a variety of cell membrane proteins through multiple actin binding sites, SH3 domains, and a proline-rich region containing binding sites for SH3 domains. The cytoplasmic protein localizes to membrane ruffles, lipid rafts, and the leading edges of cells. It is …
ENSG00000167286	Lymphocyte	CD3D	CD3d molecule, delta (CD3-TCR complex)	2	The protein encoded by this gene is part of the T-cell receptor/CD3 complex (TCR/CD3 complex) and is involved in T-cell development and signal transduction. The encoded membrane protein represents the delta subunit of the CD3 complex, and along with four other CD3 subunits, binds either TCR alpha/beta or TCR gamma/delta to form the TCR/CD3 complex on the surface of T-cells. Defects in this gene a…
ENSG00000198851	Lymphocyte	CD3E	CD3e molecule, epsilon (CD3-TCR complex)	3.1	The protein encoded by this gene is the CD3-epsilon polypeptide, which together with CD3-gamma, -delta and -zeta, and the T-cell receptor alpha/beta and gamma/delta heterodimers, forms the T-cell receptor-CD3 complex. This complex plays an important role in coupling antigen recognition to several intracellular signal-transduction pathways. The genes encoding the epsilon, gamma and delta polypepti…
ENSG00000160654	Lymphocyte	CD3G	CD3g molecule, gamma (CD3-TCR complex)	0.4	The protein encoded by this gene is the CD3-gamma polypeptide, which together with CD3-epsilon, -delta and -zeta, and the T-cell receptor alpha/beta and gamma/delta heterodimers, forms the T-cell receptor-CD3 complex. This complex plays an important role in coupling antigen recognition to several intracellular signal-transduction pathways. The genes encoding the epsilon, gamma and delta polypepti…
ENSG00000010610	Lymphocyte	CD4	CD4 molecule	44	This gene encodes a membrane glycoprotein of T lymphocytes that interacts with major histocompatibility complex class II antigenes and is also a receptor for the human immunodeficiency virus. This gene is expressed not only in T lymphocytes, but also in B cells, macrophages, and granulocytes. It is also expressed in specific regions of the brain. The protein functions to initiate or augment the e…
ENSG00000117091	Lymphocyte	CD48	CD48 molecule	5.9	This gene encodes a member of the CD2 subfamily of immunoglobulin-like receptors which includes SLAM (signaling lymphocyte activation molecules) proteins. The encoded protein is found on the surface of lymphocytes and other immune cells, dendritic cells and endothelial cells, and participates in activation and differentiation pathways in these cells. The encoded protein does not have a transmembr…
ENSG00000153563	Lymphocyte	CD8A	CD8a molecule	2.9	The CD8 antigen is a cell surface glycoprotein found on most cytotoxic T lymphocytes that mediates efficient cell-cell interactions within the immune system. The CD8 antigen acts as a coreceptor with the T-cell receptor on the T lymphocyte to recognize antigens displayed by an antigen presenting cell in the context of class I MHC molecules. The coreceptor functions as either a homodimer composed …
ENSG00000245848	Lymphocyte	CEBPA	CCAAT/enhancer binding protein (C/EBP), alpha	39.9	This intronless gene encodes a transcription factor that contains a basic leucine zipper (bZIP) domain and recognizes the CCAAT motif in the promoters of target genes. The encoded protein functions in homodimers and also heterodimers with CCAAT/enhancer-binding proteins beta and gamma. Activity of this protein can modulate the expression of genes involved in cell cycle regulation as well as in bo…
ENSG00000111729	Lymphocyte	CLEC4A	C-type lectin domain family 4, member A	0.9	This gene encodes a member of the C-type lectin/C-type lectin-like domain (CTL/CTLD) superfamily. Members of this family share a common protein fold and have diverse functions, such as cell adhesion, cell-cell signalling, glycoprotein turnover, and roles in inflammation and immune response. The encoded type 2 transmembrane protein may play a role in inflammatory and immune response. Multiple tran…
ENSG00000102879	Lymphocyte	CORO1A	Coronin, actin binding protein, 1A	5.1	This gene encodes a member of the WD repeat protein family. WD repeats are minimally conserved regions of approximately 40 amino acids typically bracketed by gly-his and trp-asp (GH-WD), which may facilitate formation of heterotrimeric or multiprotein complexes. Members of this family are involved in a variety of cellular processes, including cell cycle progression, signal transduction, apoptosis…
ENSG00000187959	Lymphocyte	CPSF4L	Cleavage and polyadenylation specific factor 4-like	0
ENSG00000221818	Lymphocyte	EBF2	Early B-cell factor 2	0	The protein encoded by this gene belongs to the COE (Collier/Olf/EBF) family of non-basic, helix-loop-helix transcription factors that have a well conserved DNA binding domain. The COE family proteins play an important role in variety of developmental processes. Studies in mouse suggest that this gene may be involved in the differentiation of osteoblasts. [provided by RefSeq, Oct 2011]
ENSG00000167658	Lymphocyte	EEF2	Eukaryotic translation elongation factor 2	227.4	This gene encodes a member of the GTP-binding translation elongation factor family. This protein is an essential factor for protein synthesis. It promotes the GTP-dependent translocation of the nascent protein chain from the A-site to the P-site of the ribosome. This protein is completely inactivated by EF-2 kinase phosporylation. [provided by RefSeq, Jul 2008]
ENSG00000145780	Lymphocyte	FEM1C	Fem-1 homolog c (C. elegans)	5.8
ENSG00000115271	Lymphocyte	GCA	Grancalcin, EF-hand calcium binding protein	5.1	This gene product, grancalcin, is a calcium-binding protein abundant in neutrophils and macrophages. It belongs to the penta-EF-hand subfamily of proteins which includes sorcin, calpain, and ALG-2. Grancalcin localization is dependent upon calcium and magnesium. In the absence of divalent cation, grancalcin localizes to the cytosolic fraction; with magnesium alone, it partitions with the granule …
ENSG00000177291	Lymphocyte	GJD4	Gap junction protein, delta 4, 40.1kDa	0	Connexins, such as GJD4, are involved in the formation of gap junctions, intercellular conduits that directly connect the cytoplasms of contacting cells. Each gap junction channel is formed by docking of 2 hemichannels, each of which contains 6 connexin subunits (Sohl et al., 2003 [PubMed 12881038]).[supplied by OMIM, Mar 2008]
ENSG00000162419	Lymphocyte	GMEB1	Glucocorticoid modulatory element binding protein 1	1.4	This gene encodes a member of KDWK gene family which associates with GMEB2 protein. The GMEB1-GMEB2 complex is essential for parvovirus DNA replication. Studies in rat for a similar gene suggest that this gene's role is to modulate the transactivation of the glucocorticoid receptor when it is bound to glucocorticoid response elements. Two alternative spliced transcript variants encoding different…
ENSG00000100453	Lymphocyte	GZMB	Granzyme B (granzyme 2, cytotoxic T-lymphocyte-associated serine esterase 1)	0.7	Cytolytic T lymphocytes (CTL) and natural killer (NK) cells share the remarkable ability to recognize, bind, and lyse specific target cells. They are thought to protect their host by lysing cells bearing on their surface 'nonself' antigens, usually peptides or proteins resulting from infection by intracellular pathogens. The protein encoded by this gene is crucial for the rapid induction of targe…
ENSG00000131097	Lymphocyte	HIGD1B	HIG1 hypoxia inducible domain family, member 1B	0.1	This gene encodes a member of the hypoxia inducible gene 1 (HIG1) domain family. The encoded protein is localized to the cell membrane and has been linked to tumorigenesis and the progression of pituitary adenomas. Alternative splicing results in multiple transcript variants. [provided by RefSeq, Dec 2012]
ENSG00000128604	Lymphocyte	IRF5	Interferon regulatory factor 5	1.3	This gene encodes a member of the interferon regulatory factor (IRF) family, a group of transcription factors with diverse roles, including virus-mediated activation of interferon, and modulation of cell growth, differentiation, apoptosis, and immune system activity. Members of the IRF family are characterized by a conserved N-terminal DNA-binding domain containing tryptophan (W) repeats. Multipl…
ENSG00000005844	Lymphocyte	ITGAL	Integrin, alpha L (antigen CD11A (p180), lymphocyte function-associated antigen 1; alpha polypeptide)	3.7	ITGAL encodes the integrin alpha L chain. Integrins are heterodimeric integral membrane proteins composed of an alpha chain and a beta chain. This I-domain containing alpha integrin combines with the beta 2 chain (ITGB2) to form the integrin lymphocyte function-associated antigen-1 (LFA-1), which is expressed on all leukocytes. LFA-1 plays a central role in leukocyte intercellular adhesion throug…
ENSG00000126337	Lymphocyte	KRT36	Keratin 36	0	The protein encoded by this gene is a member of the keratin gene family. This type I hair keratin is an acidic protein which heterodimerizes with type II keratins to form hair and nails. The type I hair keratins are clustered in a region of chromosome 17q12-q21 and have the same direction of transcription. [provided by RefSeq, Jul 2008]
ENSG00000213658	Lymphocyte	LAT	Linker for activation of T cells	0.6	The protein encoded by this gene is phosphorylated by ZAP-70/Syk protein tyrosine kinases following activation of the T-cell antigen receptor (TCR) signal transduction pathway. This transmembrane protein localizes to lipid rafts and acts as a docking site for SH2 domain-containing proteins. Upon phosphorylation, this protein recruits multiple adaptor proteins and downstream signaling molecules in…
ENSG00000143815	Lymphocyte	LBR	Lamin B receptor	15.5	The protein encoded by this gene belongs to the ERG4/ERG24 family. It localized in the nuclear envelope inner membrane and anchors the lamina and the heterochromatin to the membrane. It may mediate interaction between chromatin and lamin B. Mutations of this gene has been associated with autosomal recessive HEM/Greenberg skeletal dysplasia. Alternative splicing occurs at this locus and two transc…
ENSG00000182866	Lymphocyte	LCK	Lymphocyte-specific protein tyrosine kinase	1.2	This gene is a member of the Src family of protein tyrosine kinases (PTKs). The encoded protein is a key signaling molecule in the selection and maturation of developing T-cells. It contains N-terminal sites for myristylation and palmitylation, a PTK domain, and SH2 and SH3 domains which are involved in mediating protein-protein interactions with phosphotyrosine-containing and proline-rich motifs…
ENSG00000136167	Lymphocyte	LCP1	Lymphocyte cytosolic protein 1 (L-plastin)	23	Plastins are a family of actin-binding proteins that are conserved throughout eukaryote evolution and expressed in most tissues of higher eukaryotes. In humans, two ubiquitous plastin isoforms (L and T) have been identified. Plastin 1 (otherwise known as Fimbrin) is a third distinct plastin isoform which is specifically expressed at high levels in the small intestine. The L isoform is expressed o…
ENSG00000043462	Lymphocyte	LCP2	Lymphocyte cytosolic protein 2 (SH2 domain containing leukocyte protein of 76kDa)	8.8	SLP-76 was originally identified as a substrate of the ZAP-70 protein tyrosine kinase following T cell receptor (TCR) ligation in the leukemic T cell line Jurkat. The SLP-76 locus has been localized to human chromosome 5q33 and the gene structure has been partially characterized in mice. The human and murine cDNAs both encode 533 amino acid proteins that are 72% identical and comprised of three m…
ENSG00000206535	Lymphocyte	LNP1	Leukemia NUP98 fusion partner 1	2.3
ENSG00000130592	Lymphocyte	LSP1	Lymphocyte-specific protein 1	8.5	This gene encodes an intracellular F-actin binding protein. The protein is expressed in lymphocytes, neutrophils, macrophages, and endothelium and may regulate neutrophil motility, adhesion to fibrinogen matrix proteins, and transendothelial migration. Alternative splicing results in multiple transcript variants encoding different isoforms. [provided by RefSeq, Jul 2008]
ENSG00000213903	Lymphocyte	LTB4R	Leukotriene B4 receptor	1.2
ENSG00000240053	Lymphocyte	LY6G5B	Lymphocyte antigen 6 complex, locus G5B	1.2	LY6G5B belongs to a cluster of leukocyte antigen-6 (LY6) genes located in the major histocompatibility complex (MHC) class III region on chromosome 6. Members of the LY6 superfamily typically contain 70 to 80 amino acids, including 8 to 10 cysteines. Most LY6 proteins are attached to the cell surface by a glycosylphosphatidylinositol (GPI) anchor that is directly involved in signal transduction (…
ENSG00000126217	Lymphocyte	MCF2L	MCF.2 cell line derived transforming sequence-like	1.6
ENSG00000163563	Lymphocyte	MNDA	Myeloid cell nuclear differentiation antigen	4.4	The myeloid cell nuclear differentiation antigen (MNDA) is detected only in nuclei of cells of the granulocyte-monocyte lineage. A 200-amino acid region of human MNDA is strikingly similar to a region in the proteins encoded by a family of interferon-inducible mouse genes, designated Ifi-201, Ifi-202, and Ifi-203, that are not regulated in a cell- or tissue-specific fashion. The 1.8-kb MNDA mRNA,…
ENSG00000156738	Lymphocyte	MS4A1	Membrane-spanning 4-domains, subfamily A, member 1	0.8	This gene encodes a member of the membrane-spanning 4A gene family. Members of this nascent protein family are characterized by common structural features and similar intron/exon splice boundaries and display unique expression patterns among hematopoietic cells and nonlymphoid tissues. This gene encodes a B-lymphocyte surface molecule which plays a role in the development and differentiation of B…
ENSG00000144802	Lymphocyte	NFKBIZ	Nuclear factor of kappa light polypeptide gene enhancer in B-cells inhibitor, zeta	10.9	This gene is a member of the ankyrin-repeat family and is induced by lipopolysaccharide (LPS). The C-terminal portion of the encoded product which contains the ankyrin repeats, shares high sequence similarity with the I kappa B family of proteins. The latter are known to play a role in inflammatory responses to LPS by their interaction with NF-B proteins through ankyrin-repeat domains. Studies in…
ENSG00000116962	Lymphocyte	NID1	Nidogen 1	33.2	This gene encodes a member of the nidogen family of basement membrane glycoproteins. The protein interacts with several other components of basement membranes, and may play a role in cell interactions with the extracellular matrix. [provided by RefSeq, Jul 2008]
ENSG00000155561	Lymphocyte	NUP205	Nucleoporin 205kDa	2.2
ENSG00000182950	Lymphocyte	ODF3L1	Outer dense fiber of sperm tails 3-like 1	0.4
ENSG00000162745	Lymphocyte	OLFML2B	Olfactomedin-like 2B	0.3
ENSG00000165202	Lymphocyte	OR1Q1	Olfactory receptor, family 1, subfamily Q, member 1	0	Olfactory receptors interact with odorant molecules in the nose, to initiate a neuronal response that triggers the perception of a smell. The olfactory receptor proteins are members of a large family of G-protein-coupled receptors (GPCR) arising from single coding-exon genes. Olfactory receptors share a 7-transmembrane domain structure with many neurotransmitter and hormone receptors and are resp…
ENSG00000176895	Lymphocyte	OR51A7	Olfactory receptor, family 51, subfamily A, member 7	0	Olfactory receptors interact with odorant molecules in the nose, to initiate a neuronal response that triggers the perception of a smell. The olfactory receptor proteins are members of a large family of G-protein-coupled receptors (GPCR) arising from single coding-exon genes. Olfactory receptors share a 7-transmembrane domain structure with many neurotransmitter and hormone receptors and are resp…
ENSG00000113209	Lymphocyte	PCDHB5	Protocadherin beta 5	0.3	This gene is a member of the protocadherin beta gene cluster, one of three related gene clusters tandemly linked on chromosome five. The gene clusters demonstrate an unusual genomic organization similar to that of B-cell and T-cell receptor gene clusters. The beta cluster contains 16 genes and 3 pseudogenes, each encoding 6 extracellular cadherin domains and a cytoplasmic tail that deviates from …
ENSG00000133246	Lymphocyte	PRAM1	PML-RARA regulated adaptor molecule 1	0.5	The protein encoded by this gene is similar to FYN binding protein (FYB/SLAP-130), an adaptor protein involved in T cell receptor mediated signaling. This gene is expressed and regulated during normal myelopoiesis. The expression of this gene is induced by retinoic acid and is inhibited by the expression of PML-RARalpha, a fusion protein of promyelocytic leukemia (PML) and the retinoic acid recep…
ENSG00000126464	Lymphocyte	PRR12	Proline rich 12	1.1
ENSG00000240065	Lymphocyte	PSMB9	Proteasome (prosome, macropain) subunit, beta type, 9	24.4	The proteasome is a multicatalytic proteinase complex with a highly ordered ring-shaped 20S core structure. The core structure is composed of 4 rings of 28 non-identical subunits; 2 rings are composed of 7 alpha subunits and 2 rings are composed of 7 beta subunits. Proteasomes are distributed throughout eukaryotic cells at a high concentration and cleave peptides in an ATP/ubiquitin-dependent pro…
ENSG00000140368	Lymphocyte	PSTPIP1	Proline-serine-threonine phosphatase interacting protein 1	0.7	The protein encoded by this gene binds to the cytoplasmic tail of CD2, an effector of T cell activation and adhesion, negatively affecting CD2-triggered T cell activation. The encoded protein appears to be a scaffold protein and a regulator of the actin cytoskeleton. It has also been shown to bind ABL1, PTPN18, WAS, CD2AP, and PTPN12. Mutations in this gene are a cause of PAPA syndrome. [provided…
ENSG00000081237	Lymphocyte	PTPRC	Protein tyrosine phosphatase, receptor type, C	10.9	The protein encoded by this gene is a member of the protein tyrosine phosphatase (PTP) family. PTPs are known to be signaling molecules that regulate a variety of cellular processes including cell growth, differentiation, mitosis, and oncogenic transformation. This PTP contains an extracellular domain, a single transmembrane segment and two tandem intracytoplasmic catalytic domains, and thus is c…
ENSG00000213402	Lymphocyte	PTPRCAP	Protein tyrosine phosphatase, receptor type, C-associated protein	1.2	The protein encoded by this gene was identified as a transmembrane phosphoprotein specifically associated with tyrosine phosphatase PTPRC/CD45, a key regulator of T- and B-lymphocyte activation. The interaction with PTPRC may be required for the stable expression of this protein. [provided by RefSeq, Jul 2008]
ENSG00000169750	Lymphocyte	RAC3	Ras-related C3 botulinum toxin substrate 3 (rho family, small GTP binding protein Rac3)	2.9	The protein encoded by this gene is a GTPase which belongs to the RAS superfamily of small GTP-binding proteins. Members of this superfamily appear to regulate a diverse array of cellular events, including the control of cell growth, cytoskeletal reorganization, and the activation of protein kinases. [provided by RefSeq, Jul 2008]
ENSG00000182698	Lymphocyte	RESP18	Regulated endocrine-specific protein 18	0
ENSG00000178718	Lymphocyte	RPP25	Ribonuclease P/MRP 25kDa subunit	0.6
ENSG00000148688	Lymphocyte	RPP30	Ribonuclease P/MRP 30kDa subunit	4.3
ENSG00000143303	Lymphocyte	RRNAD1	Ribosomal RNA adenine dimethylase domain containing 1	6.5
ENSG00000196154	Lymphocyte	S100A4	S100 calcium binding protein A4	18.8	The protein encoded by this gene is a member of the S100 family of proteins containing 2 EF-hand calcium-binding motifs. S100 proteins are localized in the cytoplasm and/or nucleus of a wide range of cells, and involved in the regulation of a number of cellular processes such as cell cycle progression and differentiation. S100 genes include at least 13 members which are located as a cluster on ch…
ENSG00000100092	Lymphocyte	SH3BP1	SH3-domain binding protein 1	0.2
ENSG00000147010	Lymphocyte	SH3KBP1	SH3-domain kinase binding protein 1	8.2	This gene encodes an adapter protein that contains three N-terminal Src homology domains, a proline rich region and a C-terminal coiled-coil domain. The encoded protein facilitates protein-protein interactions and has been implicated in numerous cellular processes including apoptosis, cytoskeletal rearrangement, cell adhesion and in the regulation of clathrin-dependent endocytosis. Alternate spli…
ENSG00000153006	Lymphocyte	SREK1IP1	SREK1-interacting protein 1	2.4
ENSG00000070731	Lymphocyte	ST6GALNAC2	ST6 (alpha-N-acetyl-neuraminyl-2,3-beta-galactosyl-1,3)-N-acetylgalactosaminide alpha-2,6-sialyltransferase 2	0.3	ST6GALNAC2 belongs to a family of sialyltransferases that add sialic acids to the nonreducing ends of glycoconjugates. At the cell surface, these modifications have roles in cell-cell and cell-substrate interactions, bacterial adhesion, and protein targeting (Samyn-Petit et al., 2000 [PubMed 10742600]).[supplied by OMIM, Mar 2008]
ENSG00000186051	Lymphocyte	TAL2	T-cell acute lymphocytic leukemia 2	0	This intronless gene encodes a helix-loop-helix protein. Translocations between this gene on chromosome 9 and the T-cell receptor beta-chain locus on chromosome 7 have been associated with activation of the T-cell acute lymphocytic leukemia 2 gene and T-cell acute lymphoblastic leukemia. [provided by RefSeq, Mar 2009]
ENSG00000250264	Lymphocyte	TAP2	Uncharacterized protein	0.8
ENSG00000184436	Lymphocyte	THAP7	THAP domain containing 7	3.4
ENSG00000082512	Lymphocyte	TRAF5	TNF receptor-associated factor 5	0.4	The scaffold protein encoded by this gene is a member of the tumor necrosis factor receptor-associated factor (TRAF) protein family and contains a meprin and TRAF homology (MATH) domain, a RING-type zinc finger, and two TRAF-type zinc fingers. TRAF proteins are associated with, and mediate signal transduction from members of the TNF receptor superfamily. This protein is one of the components of a…
ENSG00000206483	Lymphocyte	TXNRD3NB	Thioredoxin reductase 3 neighbor	0
ENSG00000137288	Lymphocyte	UQCC2	Ubiquinol-cytochrome c reductase complex assembly factor 2	28.3	This gene encodes a nucleoid protein localized to the mitochondria inner membrane. The encoded protein affects regulation of insulin secretion, mitochondrial ATP production, and myogenesis through modulation of mitochondrial respiratory chain activity. [provided by RefSeq, Oct 2012]
ENSG00000115935	Lymphocyte	WIPF1	WAS/WASL interacting protein family, member 1	7.1	This gene encodes a protein that plays an important role in the organization of the actin cytoskeleton. The encoded protein binds to a region of Wiskott-Aldrich syndrome protein that is frequently mutated in Wiskott-Aldrich syndrome, an X-linked recessive disorder. Impairment of the interaction between these two proteins may contribute to the disease. Two transcript variants encoding the same pro…
ENSG00000172262	Lymphocyte	ZNF131	Zinc finger protein 131	4.7
ENSG00000159917	Lymphocyte	ZNF235	Zinc finger protein 235	0.6	This gene product belongs to the zinc finger protein superfamily, members of which are regulatory proteins characterized by nucleic acid-binding zinc finger domains. The encoded protein is a member of the Kruppel family of zinc finger proteins, and contains Kruppel-associated box (KRAB) A and B domains and 15 tandemly arrayed C2H2-type zinc fingers. It is an ortholog of the mouse Zfp93 protein. T…
ENSG00000083828	Lymphocyte	ZNF586	Zinc finger protein 586	1.5
ENSG00000177873	Lymphocyte	ZNF619	Zinc finger protein 619	0.8

## Sheet: Table S-4
ENSG ID	Expression pattern	Gene Symbol	Gene Name	FPKM	Info
ENSG00000133627	Stellate Cell	ACTR3B	ARP3 actin-related protein 3 homolog B (yeast)	2.1	This gene encodes a member of the actin-related proteins (ARP), which form multiprotein complexes and share 35-55% amino acid identity with conventional actin. The protein encoded by this gene may have a regulatory role in the actin cytoskeleton and induce cell-shape change and motility. Pseudogenes of this gene are located on chromosomes 2, 4, 10, 16, 22 and Y. Alternative splicing results in mu…
ENSG00000197859	Stellate Cell	ADAMTSL2	ADAMTS-like 2	6.4	This gene encodes a member of the ADAMTS (a disintegrin and metalloproteinase with thrombospondin motifs) and ADAMTS-like protein family. Members of the family share several distinct protein modules, including a propeptide region, a metalloproteinase domain, a disintegrin-like domain, and a thrombospondin type 1 (TS) motif. Individual members of this family differ in the number of C-terminal TS m…
ENSG00000137077	Stellate Cell	CCL21	Chemokine (C-C motif) ligand 21	21.8	This antimicrobial gene is one of several CC cytokine genes clustered on the p-arm of chromosome 9. Cytokines are a family of secreted proteins involved in immunoregulatory and inflammatory processes. The CC cytokines are proteins characterized by two adjacent cysteines. Similar to other chemokines the protein encoded by this gene inhibits hemopoiesis and stimulates chemotaxis. This protein is ch…
ENSG00000064300	Stellate Cell	NGFR	Nerve growth factor receptor	7.1	Nerve growth factor receptor contains an extracellular domain containing four 40-amino acid repeats with 6 cysteine residues at conserved positions followed by a serine/threonine-rich region, a single transmembrane domain, and a 155-amino acid cytoplasmic domain. The cysteine-rich region contains the nerve growth factor binding domain. [provided by RefSeq, Jul 2008]
ENSG00000161381	Stellate Cell	PLXDC1	Plexin domain containing 1	0.4

## Sheet: Table S-5
ENSG ID	Expression Pattern	Gene Symbol	Gene Name	FPKM	Info
ENSG00000266967	Sinusoidal	AARSD1	Alanyl-tRNA synthetase domain containing 1	8.2
ENSG00000214708	Sinusoidal	AC090616.2	Uncharacterized protein
ENSG00000138071	Sinusoidal	ACTR2	ARP2 actin-related protein 2 homolog (yeast)	39.3	The specific function of this gene has not yet been determined; however, the protein it encodes is known to be a major constituent of the ARP2/3 complex. This complex is located at the cell surface and is essential to cell shape and motility through lamellipodial actin assembly and protrusion. Two transcript variants encoding different isoforms have been found for this gene. [provided by RefSeq, …
ENSG00000106526	Sinusoidal	ACTR3C	ARP3 actin-related protein 3 homolog C (yeast)	5.6
ENSG00000196839	Sinusoidal	ADA	Adenosine deaminase	0.9	This gene encodes an enzyme that catalyzes the hydrolysis of adenosine to inosine. Various mutations have been described for this gene and have been linked to human diseases. Deficiency in this enzyme causes a form of severe combined immunodeficiency disease (SCID), in which there is dysfunction of both B and T lymphocytes with impaired cellular immunity and decreased production of immunoglobulin…
ENSG00000148926	Sinusoidal	ADM	Adrenomedullin	36.9	The protein encoded by this gene is a preprohormone which is cleaved to form two biologically active peptides, adrenomedullin and proadrenomedullin N-terminal 20 peptide. Adrenomedullin is a 52 aa peptide with several functions, including vasodilation, regulation of hormone secretion, promotion of angiogenesis, and antimicrobial activity. The antimicrobial activity is antibacterial, as the peptid…
ENSG00000165923	Sinusoidal	AGBL2	ATP/GTP binding protein-like 2	0.8
ENSG00000158669	Sinusoidal	AGPAT6	1-acylglycerol-3-phosphate O-acyltransferase 6	7.5	Lysophosphatidic acid acyltransferases (EC 2.3.1.51) catalyze the conversion of lysophosphatidic acid (LPA) to phosphatidic acid (PA). LPA and PA are involved in signal transduction and lipid biosynthesis.[supplied by OMIM, Apr 2004]
ENSG00000155085	Sinusoidal	AK9	Adenylate kinase 9	1
ENSG00000139211	Sinusoidal	AMIGO2	Adhesion molecule with Ig-like domain 2	1.8
ENSG00000196510	Sinusoidal	ANAPC7	Anaphase promoting complex subunit 7	4.5	This gene encodes a tetratricopeptide repeat containing component of the anaphase promoting complex/cyclosome (APC/C), a large E3 ubiquitin ligase that controls cell cycle progression by targeting a number of cell cycle regulators such as B-type cyclins for 26S proteasome-mediated degradation through ubiquitination. The encoded protein is required for proper protein ubiquitination function of APC…
ENSG00000213337	Sinusoidal	ANKRD39	Ankyrin repeat domain 39	3.8
ENSG00000064999	Sinusoidal	ANKS1A	Ankyrin repeat and sterile alpha motif domain containing 1A	2.3
ENSG00000138772	Sinusoidal	ANXA3	Annexin A3	1.1	This gene encodes a member of the annexin family. Members of this calcium-dependent phospholipid-binding protein family play a role in the regulation of cellular growth and in signal transduction pathways. This protein functions in the inhibition of phopholipase A2 and cleavage of inositol 1,2-cyclic phosphate to form inositol 1-phosphate. This protein may also play a role in anti-coagulation. [p…
ENSG00000218537	Sinusoidal	AP000350.4	Uncharacterized protein
ENSG00000053770	Sinusoidal	AP5M1	Adaptor-related protein complex 5, mu 1 subunit	6.1
ENSG00000011132	Sinusoidal	APBA3	Amyloid beta (A4) precursor protein-binding, family A, member 3	1.3	The protein encoded by this gene is a member of the X11 protein family. It is an adapter protein that interacts with the Alzheimer's disease amyloid precursor protein. This gene product is believed to be involved in signal transduction processes. This gene is a candidate gene for Alzheimer's disease. [provided by RefSeq, Jul 2008]
ENSG00000185176	Sinusoidal	AQP12B	Aquaporin 12B	0
ENSG00000104880	Sinusoidal	ARHGEF18	Rho/Rac guanine nucleotide exchange factor (GEF) 18	2.5	Rho GTPases are GTP binding proteins that regulate a wide spectrum of cellular functions. These cellular processes include cytoskeletal rearrangements, gene transcription, cell growth and motility. Activation of Rho GTPases is under the direct control of guanine nucleotide exchange factors (GEFs). The protein encoded by this gene is a guanine nucleotide exchange factor and belongs to the Rho GTPa…
ENSG00000213214	Sinusoidal	ARHGEF35	Rho guanine nucleotide exchange factor (GEF) 35	2
ENSG00000213760	Sinusoidal	ATP6V1G2	ATPase, H+ transporting, lysosomal 13kDa, V1 subunit G2	0.2	This gene encodes a component of vacuolar ATPase (V-ATPase), a multisubunit enzyme that mediates acidification of intracellular compartments of eukaryotic cells. V-ATPase dependent acidification is necessary for such intracellular processes as protein sorting, zymogen activation, receptor-mediated endocytosis, and synaptic vesicle proton gradient generation. V-ATPase is composed of a cytosolic V1…
ENSG00000168646	Sinusoidal	AXIN2	Axin 2	0.9	The Axin-related protein, Axin2, presumably plays an important role in the regulation of the stability of beta-catenin in the Wnt signaling pathway, like its rodent homologs, mouse conductin/rat axil. In mouse, conductin organizes a multiprotein complex of APC (adenomatous polyposis of the colon), beta-catenin, glycogen synthase kinase 3-beta, and conductin, which leads to the degradation of beta…
ENSG00000183778	Sinusoidal	B3GALT5	UDP-Gal:betaGlcNAc beta 1,3-galactosyltransferase, polypeptide 5	0	This gene encodes a member of a family of membrane-bound glycoproteins. The encoded protein may synthesize type 1 Lewis antigens, which are elevated in gastrointestinal and pancreatic cancers. Alternatively spliced transcript variants have been observed for this gene, but the full-length nature of some of these variants has not been determined. [provided by RefSeq, Jul 2013]
ENSG00000136717	Sinusoidal	BIN1	Bridging integrator 1	7.7	This gene encodes several isoforms of a nucleocytoplasmic adaptor protein, one of which was initially identified as a MYC-interacting protein with features of a tumor suppressor. Isoforms that are expressed in the central nervous system may be involved in synaptic vesicle endocytosis and may interact with dynamin, synaptojanin, endophilin, and clathrin. Isoforms that are expressed in muscle and u…
ENSG00000172270	Sinusoidal	BSG	Basigin (Ok blood group)	59.3	The protein encoded by this gene is a plasma membrane protein that is important in spermatogenesis, embryo implantation, neural network formation, and tumor progression. The encoded protein is also a member of the immunoglobulin superfamily. Multiple transcript variants encoding different isoforms have been found for this gene. [provided by RefSeq, Jul 2008]
ENSG00000170270	Sinusoidal	C14orf142	Chromosome 14 open reading frame 142	5.5
ENSG00000186665	Sinusoidal	C17orf58	Chromosome 17 open reading frame 58	3.6
ENSG00000108666	Sinusoidal	C17orf75	Chromosome 17 open reading frame 75	4.5
ENSG00000179397	Sinusoidal	C1orf101	Chromosome 1 open reading frame 101	0.1
ENSG00000159403	Sinusoidal	C1R	Complement component 1, r subcomponent	820.8
ENSG00000176659	Sinusoidal	C20orf197	Chromosome 20 open reading frame 197	0
ENSG00000187944	Sinusoidal	C2orf66	Chromosome 2 open reading frame 66	0
ENSG00000197405	Sinusoidal	C5AR1	Complement component 5a receptor 1	10.1
ENSG00000165084	Sinusoidal	C8orf34	Chromosome 8 open reading frame 34	0
ENSG00000188523	Sinusoidal	C9orf171	Chromosome 9 open reading frame 171	0
ENSG00000164047	Sinusoidal	CAMP	Cathelicidin antimicrobial peptide	0.6	This gene encodes a member of an antimicrobial peptide family, characterized by a highly conserved N-terminal signal peptide containing a cathelin domain and a structurally variable cationic antimicrobial peptide, which is produced by extracellular proteolysis from the C-terminus. In addition to its antibacterial, antifungal, and antiviral activities, the encoded protein functions in cell chemota…
ENSG00000131236	Sinusoidal	CAP1	CAP, adenylate cyclase-associated protein 1 (yeast)	52.7	The protein encoded by this gene is related to the S. cerevisiae CAP protein, which is involved in the cyclic AMP pathway. The human protein is able to interact with other molecules of the same protein, as well as with CAP2 and actin. Alternatively spliced transcript variants have been identified. [provided by RefSeq, Jul 2008]
ENSG00000142330	Sinusoidal	CAPN10	Calpain 10	0.6	Calpains represent a ubiquitous, well-conserved family of calcium-dependent cysteine proteases. The calpain proteins are heterodimers consisting of an invariant small subunit and variable large subunits. The large catalytic subunit has four domains: domain I, the N-terminal regulatory domain that is processed upon calpain activation; domain II, the protease domain; domain III, a linker domain of …
ENSG00000198898	Sinusoidal	CAPZA2	Capping protein (actin filament) muscle Z-line, alpha 2	7.7	The protein encoded by this gene is a member of the F-actin capping protein alpha subunit family. It is the alpha subunit of the barbed-end actin binding protein Cap Z. By capping the barbed end of actin filaments, Cap Z regulates the growth of the actin filaments at the barbed end. [provided by RefSeq, Jul 2008]
ENSG00000172508	Sinusoidal	CARNS1	Carnosine synthase 1	0.1	CARNS1 (EC 6.3.2.11), a member of the ATP-grasp family of ATPases, catalyzes the formation of carnosine (beta-alanyl-L-histidine) and homocarnosine (gamma-aminobutyryl-L-histidine), which are found mainly in skeletal muscle and the central nervous system, respectively (Drozak et al., 2010 [PubMed 20097752]).[supplied by OMIM, Apr 2010]
ENSG00000003400	Sinusoidal	CASP10	Caspase 10, apoptosis-related cysteine peptidase	2.2	This gene encodes a protein which is a member of the cysteine-aspartic acid protease (caspase) family. Sequential activation of caspases plays a central role in the execution-phase of cell apoptosis. Caspases exist as inactive proenzymes which undergo proteolytic processing at conserved aspartic residues to produce two subunits, large and small, that dimerize to form the active enzyme. This prote…
ENSG00000172785	Sinusoidal	CBWD1	COBW domain containing 1	11.6
ENSG00000196873	Sinusoidal	CBWD3	COBW domain containing 3	12.4
ENSG00000198937	Sinusoidal	CCDC167	Coiled-coil domain containing 167	16.6
ENSG00000130783	Sinusoidal	CCDC62	Coiled-coil domain containing 62	0
ENSG00000105321	Sinusoidal	CCDC9	Coiled-coil domain containing 9	6.6
ENSG00000108691	Sinusoidal	CCL2	Chemokine (C-C motif) ligand 2	116.4	This gene is one of several cytokine genes clustered on the q-arm of chromosome 17. Chemokines are a superfamily of secreted proteins involved in immunoregulatory and inflammatory processes. The superfamily is divided into four subfamilies based on the arrangement of N-terminal cysteine residues of the mature peptide. This chemokine is a member of the CC subfamily which is characterized by two ad…
ENSG00000158825	Sinusoidal	CDA	Cytidine deaminase	19.1	This gene encodes an enzyme involved in pyrimidine salvaging. The encoded protein forms a homotetramer that catalyzes the irreversible hydrolytic deamination of cytidine and deoxycytidine to uridine and deoxyuridine, respectively. It is one of several deaminases responsible for maintaining the cellular pyrimidine pool. Mutations in this gene are associated with decreased sensitivity to the cytosi…
ENSG00000070831	Sinusoidal	CDC42	Cell division cycle 42	42.7	The protein encoded by this gene is a small GTPase of the Rho-subfamily, which regulates signaling pathways that control diverse cellular functions including cell morphology, migration, endocytosis and cell cycle progression. This protein is highly similar to Saccharomyces cerevisiae Cdc 42, and is able to complement the yeast cdc42-1 mutant. The product of oncogene Dbl was reported to specifical…
ENSG00000006837	Sinusoidal	CDKL3	Cyclin-dependent kinase-like 3	0.1	The protein encoded by this gene is a member of cyclin-dependent protein kinase (CDK) family. CDK family members are highly similar to the gene products of Saccharomyces cerevisiae cdc28, and Schizosaccharomyces pombe cdc2, and are known to be important regulators of cell cycle progression. This gene was identified as a gene absent in leukemic patients with chromosome 5q deletion. This loss may b…
ENSG00000140488	Sinusoidal	CELF6	CUGBP, Elav-like family member 6	0.3	Members of the CELF/BRUNOL protein family contain two N-terminal RNA recognition motif (RRM) domains, one C-terminal RRM domain, and a divergent segment of 160-230 aa between the second and third RRM domains. Members of this protein family regulate pre-mRNA alternative splicing and may also be involved in mRNA editing, and translation. Multiple alternatively spliced transcript variants encoding d…
ENSG00000165410	Sinusoidal	CFL2	Cofilin 2 (muscle)	52.4	This gene encodes an intracellular protein that is involved in the regulation of actin-filament dynamics. This protein is a major component of intranuclear and cytoplasmic actin rods. It can bind G- and F-actin in a 1:1 ratio of cofilin to actin, and it reversibly controls actin polymerization and depolymerization in a pH-dependent manner. Mutations in this gene cause nemaline myopathy type 7, a …
ENSG00000198824	Sinusoidal	CHAMP1	Chromosome alignment maintaining phosphoprotein 1	5.1
ENSG00000122966	Sinusoidal	CIT	Citron (rho-interacting, serine/threonine kinase 21)	0.1	This gene encodes a serine/threonine-protein kinase that functions in cell division. Together with the kinesin KIF14, this protein localizes to the central spindle and midbody, and functions to promote efficient cytokinesis. This protein is involved in central nervous system development. Polymorphisms in this gene are associated with bipolar disorder and risk for schizophrenia. Alternative splici…
ENSG00000172322	Sinusoidal	CLEC12A	C-type lectin domain family 12, member A	1.6	This gene encodes a member of the C-type lectin/C-type lectin-like domain (CTL/CTLD) superfamily. Members of this family share a common protein fold and have diverse functions, such as cell adhesion, cell-cell signaling, glycoprotein turnover, and roles in inflammation and immune response. The protein encoded by this gene is a negative regulator of granulocyte and monocyte function. Several alter…
ENSG00000166527	Sinusoidal	CLEC4D	C-type lectin domain family 4, member D	0	This gene encodes a member of the C-type lectin/C-type lectin-like domain (CTL/CTLD) superfamily. Members of this family share a common protein fold and have diverse functions, such as cell adhesion, cell-cell signalling, glycoprotein turnover, and roles in inflammation and immune response. This gene is closely linked to other CTL/CTLD superfamily members on chromosome 12p13 in the natural killer…
ENSG00000188822	Sinusoidal	CNR2	Cannabinoid receptor 2 (macrophage)	0	The cannabinoid delta-9-tetrahydrocannabinol is the principal psychoactive ingredient of marijuana. The proteins encoded by this gene and the cannabinoid receptor 1 (brain) (CNR1) gene have the characteristics of a guanine nucleotide-binding protein (G-protein)-coupled receptor for cannabinoids. They inhibit adenylate cyclase activity in a dose-dependent, stereoselective, and pertussis toxin-sens…
ENSG00000119397	Sinusoidal	CNTRL	Centriolin	1.3	This gene encodes a centrosomal protein required for the centrosome to function as a microtubule organizing center. The gene product is also associated with centrosome maturation. One version of stem cell myeloproliferative disorder is the result of a reciprocal translocation between chromosomes 8 and 9, with the breakpoint associated with fibroblast growth factor receptor 1 and centrosomal prote…
ENSG00000103051	Sinusoidal	COG4	Component of oligomeric golgi complex 4	6.1	The protein encoded by this gene is a component of an oligomeric protein complex involved in the structure and function of the Golgi apparatus. Defects in this gene may be a cause of congenital disorder of glycosylation type IIj. Two transcript variants encoding different isoforms have been found for this gene.[provided by RefSeq, Aug 2010]
ENSG00000121022	Sinusoidal	COPS5	COP9 signalosome subunit 5	20	The protein encoded by this gene is one of the eight subunits of COP9 signalosome, a highly conserved protein complex that functions as an important regulator in multiple signaling pathways. The structure and function of COP9 signalosome is similar to that of the 19S regulatory particle of 26S proteasome. COP9 signalosome has been shown to interact with SCF-type E3 ubiquitin ligases and act as a …
ENSG00000103426	Sinusoidal	CORO7-PAM16	CORO7-PAM16 readthrough	0	This locus represents naturally occurring read-through transcription between the neighboring CORO7 (coronin 7) and PAM16 (presequence translocase-associated motor 16) genes on chromosome 16. The read-through transcript encodes a fusion protein that shares sequence identity with each individual gene product. [provided by RefSeq, Jan 2011]
ENSG00000119535	Sinusoidal	CSF3R	Colony stimulating factor 3 receptor (granulocyte)	3.2	The protein encoded by this gene is the receptor for colony stimulating factor 3, a cytokine that controls the production, differentiation, and function of granulocytes. The encoded protein, which is a member of the family of cytokine receptors, may also function in some cell surface adhesion or recognition processes. Alternatively spliced transcript variants have been described. Mutations in thi…
ENSG00000263020	Sinusoidal	CSNK2B-LY6G5B-1181	Uncharacterized protein	0.1
ENSG00000175183	Sinusoidal	CSRP2	Cysteine and glycine-rich protein 2	8.8	CSRP2 is a member of the CSRP family of genes, encoding a group of LIM domain proteins, which may be involved in regulatory processes important for development and cellular differentiation. CRP2 contains two copies of the cysteine-rich amino acid sequence motif (LIM) with putative zinc-binding activity, and may be involved in regulating ordered cell growth. Other genes in the family include CSRP1…
ENSG00000121552	Sinusoidal	CSTA	Cystatin A (stefin A)	14.1	The cystatin superfamily encompasses proteins that contain multiple cystatin-like sequences. Some of the members are active cysteine protease inhibitors, while others have lost or perhaps never acquired this inhibitory activity. There are three inhibitory families in the superfamily, including the type 1 cystatins (stefins), type 2 cystatins, and kininogens. This gene encodes a stefin that functi…
ENSG00000159692	Sinusoidal	CTBP1	C-terminal binding protein 1	23.7	This gene encodes a protein that binds to the C-terminus of adenovirus E1A proteins. This phosphoprotein is a transcriptional repressor and may play a role during cellular proliferation. This protein and the product of a second closely related gene, CTBP2, can dimerize. Both proteins can also interact with a polycomb group protein complex which participates in regulation of gene expression during…
ENSG00000268861	Sinusoidal	CTD-2207O23.3	Rho guanine nucleotide exchange factor 18	0.1	Rho GTPases are GTP binding proteins that regulate a wide spectrum of cellular functions. These cellular processes include cytoskeletal rearrangements, gene transcription, cell growth and motility. Activation of Rho GTPases is under the direct control of guanine nucleotide exchange factors (GEFs). The protein encoded by this gene is a guanine nucleotide exchange factor and belongs to the Rho GTPa…
ENSG00000265118	Sinusoidal	CTD-2370N5.3		0.1
ENSG00000100448	Sinusoidal	CTSG	Cathepsin G	0.4	The protein encoded by this gene, a member of the peptidase S1 protein family, is found in azurophil granules of neutrophilic polymorphonuclear leukocytes. The encoded protease has a specificity similar to that of chymotrypsin C, and may participate in the killing and digestion of engulfed pathogens, and in connective tissue remodeling at sites of inflammation. In addition, the encoded protein is…
ENSG00000257923	Sinusoidal	CUX1	Cut-like homeobox 1	10.8	The protein encoded by this gene is a member of the homeodomain family of DNA binding proteins. It may regulate gene expression, morphogenesis, and differentiation and it may also play a role in the cell cycle progession. Several alternatively spliced transcript variants encoding different isoforms have been identified.[provided by RefSeq, Feb 2011]
ENSG00000185753	Sinusoidal	CXorf38	Chromosome X open reading frame 38	2.8
ENSG00000179142	Sinusoidal	CYP11B2	Cytochrome P450, family 11, subfamily B, polypeptide 2	0	This gene encodes a member of the cytochrome P450 superfamily of enzymes. The cytochrome P450 proteins are monooxygenases which catalyze many reactions involved in drug metabolism and synthesis of cholesterol, steroids and other lipids. This protein localizes to the mitochondrial inner membrane. The enzyme has steroid 18-hydroxylase activity to synthesize aldosterone and 18-oxocortisol as well as…
ENSG00000071626	Sinusoidal	DAZAP1	DAZ associated protein 1	11.1	In mammals, the Y chromosome directs the development of the testes and plays an important role in spermatogenesis. A high percentage of infertile men have deletions that map to regions of the Y chromosome. The DAZ (deleted in azoospermia) gene cluster maps to the AZFc region of the Y chromosome and is deleted in many azoospermic and severely oligospermic men. It is thought that the DAZ gene clust…
ENSG00000064703	Sinusoidal	DDX20	DEAD (Asp-Glu-Ala-Asp) box polypeptide 20	1.5	DEAD box proteins, characterized by the conserved motif Asp-Glu-Ala-Asp (DEAD), are putative RNA helicases. They are implicated in a number of cellular processes involving alteration of RNA secondary structure such as translation initiation, nuclear and mitochondrial splicing, and ribosome and spliceosome assembly. Based on their distribution patterns, some members of this family are believed to …
ENSG00000205744	Sinusoidal	DENND1C	DENN/MADD domain containing 1C	0.8	Clathrin (see MIM 118955)-mediated endocytosis is a major mechanism for internalization of proteins and lipids. Members of the connecdenn family, such as DENND1C, function as guanine nucleotide exchange factors (GEFs) for the early endosomal small GTPase RAB35 (MIM 604199) and bind to clathrin and clathrin adaptor protein-2 (AP2; see MIM 601024). Thus, connecdenns link RAB35 activation with the c…
ENSG00000174953	Sinusoidal	DHX36	DEAH (Asp-Glu-Ala-His) box polypeptide 36	6.5	This gene is a member of the DEAH-box family of RNA-dependent NTPases which are named after the conserved amino acid sequence Asp-Glu-Ala-His in motif II. The protein encoded by this gene has been shown to enhance the deadenylation and decay of mRNAs with 3'-UTR AU-rich elements (ARE-mRNA). The protein has also been shown to resolve into single strands the highly stable tetramolecular DNA configu…
ENSG00000120675	Sinusoidal	DNAJC15	DnaJ (Hsp40) homolog, subfamily C, member 15	1.7
ENSG00000102580	Sinusoidal	DNAJC3	DnaJ (Hsp40) homolog, subfamily C, member 3	18.4	This gene encodes a protein with multiple tetratricopeptide repeat (TPR) motifs as well as the highly conserved J domain found in DNAJ chaperone family members. It is a member of the tetratricopeptide repeat family of proteins and acts as an inhibitor of the interferon-induced, dsRNA-activated protein kinase (PKR). [provided by RefSeq, Jul 2010]
ENSG00000088305	Sinusoidal	DNMT3B	DNA (cytosine-5-)-methyltransferase 3 beta	0.3	CpG methylation is an epigenetic modification that is important for embryonic development, imprinting, and X-chromosome inactivation. Studies in mice have demonstrated that DNA methylation is required for mammalian development. This gene encodes a DNA methyltransferase which is thought to function in de novo methylation, rather than maintenance methylation. The protein localizes primarily to the …
ENSG00000147459	Sinusoidal	DOCK5	Dedicator of cytokinesis 5	2.8
ENSG00000147443	Sinusoidal	DOK2	Docking protein 2, 56kDa	2.9	The protein encoded by this gene is constitutively tyrosine phosphorylated in hematopoietic progenitors isolated from chronic myelogenous leukemia (CML) patients in the chronic phase. It may be a critical substrate for p210(bcr/abl), a chimeric protein whose presence is associated with CML. This encoded protein binds p120 (RasGAP) from CML cells. [provided by RefSeq, Jul 2008]
ENSG00000162490	Sinusoidal	DRAXIN	Dorsal inhibitory axon guidance protein	0
ENSG00000203666	Sinusoidal	EFCAB2	EF-hand calcium binding domain 2	1.5	The gene encodes a protein that contains two EF-hand calcium-binding domains although its function has yet to be determined. Alternatively spliced transcripts have been observed. [provided by RefSeq, Mar 2014]
ENSG00000214360	Sinusoidal	EFCAB9	EF-hand calcium binding domain 9	0
ENSG00000142634	Sinusoidal	EFHD2	EF-hand domain family, member D2	8
ENSG00000119718	Sinusoidal	EIF2B2	Eukaryotic translation initiation factor 2B, subunit 2 beta, 39kDa	0.7	This gene encodes the beta subunit of eukaryotic initiation factor-2B (EIF2B). EIF2B is involved in protein synthesis and exchanges GDP and GTP for its activation and deactivation. [provided by RefSeq, Aug 2011]
ENSG00000100353	Sinusoidal	EIF3D	Eukaryotic translation initiation factor 3, subunit D	27.4	Eukaryotic translation initiation factor-3 (eIF3), the largest of the eIFs, is a multiprotein complex composed of at least ten nonidentical subunits. The complex binds to the 40S ribosome and helps maintain the 40S and 60S ribosomal subunits in a dissociated state. It is also thought to play a role in the formation of the 40S initiation complex by interacting with the ternary complex of eIF2/GTP/…
ENSG00000084623	Sinusoidal	EIF3I	Eukaryotic translation initiation factor 3, subunit I	46.1
ENSG00000184708	Sinusoidal	EIF4ENIF1	Eukaryotic translation initiation factor 4E nuclear import factor 1	2.7	The protein encoded by this gene is a nucleocytoplasmic shuttle protein for the translation initiation factor eIF4E. This shuttle protein interacts with the importin alpha-beta complex to mediate nuclear import of eIF4E. It is predominantly cytoplasmic; its own nuclear import is regulated by a nuclear localization signal and nuclear export signals. Multiple transcript variants encoding different …
ENSG00000197774	Sinusoidal	EME2	Essential meiotic structure-specific endonuclease subunit 2	0	EME2 forms a heterodimer with MUS81 (MIM 606591) that functions as an XPF (MIM 278760)-type flap/fork endonuclease in DNA repair (Ciccia et al., 2007 [PubMed 17289582]).[supplied by OMIM, Mar 2008]
ENSG00000116106	Sinusoidal	EPHA4	EPH receptor A4	0.2	This gene belongs to the ephrin receptor subfamily of the protein-tyrosine kinase family. EPH and EPH-related receptors have been implicated in mediating developmental events, particularly in the nervous system. Receptors in the EPH subfamily typically have a single kinase domain and an extracellular region containing a Cys-rich domain and 2 fibronectin type III repeats. The ephrin receptors are …
ENSG00000135333	Sinusoidal	EPHA7	EPH receptor A7	0	This gene belongs to the ephrin receptor subfamily of the protein-tyrosine kinase family. EPH and EPH-related receptors have been implicated in mediating developmental events, particularly in the nervous system. Receptors in the EPH subfamily typically have a single kinase domain and an extracellular region containing a Cys-rich domain and 2 fibronectin type III repeats. The ephrin receptors are …
ENSG00000121053	Sinusoidal	EPX	Eosinophil peroxidase	0	This gene is a member of the peroxidase gene family and is expressed in eosinophils. The encoded precursor protein is processed into covalently attached heavy and light chains to form the mature enzyme, which functions as an oxidant. The enzyme is released at sites of parasitic infection or allergen stimulation to mediate lysis of protozoa or parasitic worms. The gene is found in a cluster of thr…
ENSG00000185862	Sinusoidal	EVI2B	Ecotropic viral integration site 2B	6.2
ENSG00000196405	Sinusoidal	EVL	Enah/Vasp-like	12.6
ENSG00000077348	Sinusoidal	EXOSC5	Exosome component 5	5
ENSG00000092820	Sinusoidal	EZR	Ezrin	27.5	The cytoplasmic peripheral membrane protein encoded by this gene functions as a protein-tyrosine kinase substrate in microvilli. As a member of the ERM protein family, this protein serves as an intermediate between the plasma membrane and the actin cytoskeleton. This protein plays a key role in cell surface structure adhesion, migration and organization, and it has been implicated in various huma…
ENSG00000188659	Sinusoidal	FAM154B	Family with sequence similarity 154, member B	0.6
ENSG00000177150	Sinusoidal	FAM210A	Family with sequence similarity 210, member A	4.2
ENSG00000071859	Sinusoidal	FAM50A	Family with sequence similarity 50, member A	14.3	This gene belongs to the FAM50 family. The encoded protein is highly conserved in length and sequence across different species. It is a basic protein containing a nuclear localization signal, and may function as a DNA-binding protein or a transcriptional factor. [provided by RefSeq, Sep 2009]
ENSG00000124279	Sinusoidal	FASTKD3	FAST kinase domains 3	2	This gene encodes a member of a small family of Fas-activated serine/threonine kinase domain (FASTKD) containing proteins that share an amino terminal mitochondrial targeting domain and multiple carboxy terminal FAST domains as well as a putative RNA-binding RAP domain. The members of this family are ubiquitously expressed and are generally most abundant in mitochondria-enriched tissues such as h…
ENSG00000157107	Sinusoidal	FCHO2	FCH domain only 2	4.9
ENSG00000085265	Sinusoidal	FCN1	Ficolin (collagen/fibrinogen domain containing) 1	6.6	The ficolin family of proteins are characterized by the presence of a leader peptide, a short N-terminal segment, followed by a collagen-like region, and a C-terminal fibrinogen-like domain. The collagen-like and the fibrinogen-like domains are also found separately in other proteins such as complement protein C1q, C-type lectins known as collectins, and tenascins. However, all these proteins rec…
ENSG00000105550	Sinusoidal	FGF21	Fibroblast growth factor 21	6.7	The protein encoded by this gene is a member of the fibroblast growth factor (FGF) family. FGF family members possess broad mitogenic and cell survival activities and are involved in a variety of biological processes including embryonic development, cell growth, morphogenesis, tissue repair, tumor growth and invasion. The function of this growth factor has not yet been determined. [provided by Re…
ENSG00000112214	Sinusoidal	FHL5	Four and a half LIM domains 5	0	The protein encoded by this gene is coordinately expressed with activator of cAMP-responsive element modulator (CREM). It is associated with CREM and confers a powerful transcriptional activation function. CREM acts as a transcription factor essential for the differentiation of spermatids into mature spermatozoa. There are multiple polyadenylation sites found in this gene. Alternative splicing re…
ENSG00000177731	Sinusoidal	FLII	Flightless I homolog (Drosophila)	8.5	This gene encodes a protein with a gelsolin-like actin binding domain and an N-terminal leucine-rich repeat-protein protein interaction domain. The protein is similar to a Drosophila protein involved in early embryogenesis and the structural organization of indirect flight muscle. The gene is located within the Smith-Magenis syndrome region on chromosome 17. [provided by RefSeq, Jul 2008]
ENSG00000184922	Sinusoidal	FMNL1	Formin-like 1	2.4	This gene encodes a formin-related protein. Formin-related proteins have been implicated in morphogenesis, cytokinesis, and cell polarity. An alternative splice variant has been described but its full length sequence has not been determined. [provided by RefSeq, Jul 2008]
ENSG00000076258	Sinusoidal	FMO4	Flavin containing monooxygenase 4	15.6	Metabolic N-oxidation of the diet-derived amino-trimethylamine (TMA) is mediated by flavin-containing monooxygenase and is subject to an inherited FMO3 polymorphism in man resulting in a small subpopulation with reduced TMA N-oxidation capacity resulting in fish odor syndrome Trimethylaminuria. Three forms of the enzyme, FMO1 found in fetal liver, FMO2 found in adult liver, and FMO3 are encoded b…
ENSG00000150907	Sinusoidal	FOXO1	Forkhead box O1	14.3	This gene belongs to the forkhead family of transcription factors which are characterized by a distinct forkhead domain. The specific function of this gene has not yet been determined; however, it may play a role in myogenic growth and differentiation. Translocation of this gene with PAX3 has been associated with alveolar rhabdomyosarcoma. [provided by RefSeq, Jul 2008]
ENSG00000170324	Sinusoidal	FRMPD2	FERM and PDZ domain containing 2	0	This gene encodes a peripheral membrane protein and is located in a region of chromosome 10q that contains a segmental duplication. This copy of the gene is full-length and is in the telomeric duplicated region. Two other more centromerically proximal copies of the gene are partial and may represent pseudogenes. This full-length gene appears to function in the establishment and maintenance of cel…
ENSG00000265817	Sinusoidal	FSBP	Fibrinogen silencer binding protein	0.5
ENSG00000196371	Sinusoidal	FUT4	Fucosyltransferase 4 (alpha (1,3) fucosyltransferase, myeloid-specific)	0.5	The product of this gene transfers fucose to N-acetyllactosamine polysaccharides to generate fucosylated carbohydrate structures. It catalyzes the synthesis of the non-sialylated antigen, Lewis x (CD15). [provided by RefSeq, Jan 2009]
ENSG00000160211	Sinusoidal	G6PD	Glucose-6-phosphate dehydrogenase	3	This gene encodes glucose-6-phosphate dehydrogenase. This protein is a cytosolic enzyme encoded by a housekeeping X-linked gene whose main function is to produce NADPH, a key electron donor in the defense against oxidizing agents and in reductive biosynthetic reactions. G6PD is remarkable for its genetic diversity. Many variants of G6PD, mostly produced from missense mutations, have been describe…
ENSG00000177628	Sinusoidal	GBA	Glucosidase, beta, acid	11.9	This gene encodes a lysosomal membrane protein that cleaves the beta-glucosidic linkage of glycosylceramide, an intermediate in glycolipid metabolism. Mutations in this gene cause Gaucher disease, a lysosomal storage disease characterized by an accumulation of glucocerebrosides. A related pseudogene is approximately 12 kb downstream of this gene on chromosome 1. Alternative splicing results in mu…
ENSG00000162654	Sinusoidal	GBP4	Guanylate binding protein 4	5.6	Guanylate-binding proteins, such as GBP4, are induced by interferon and hydrolyze GTP to both GDP and GMP (Vestal, 2005 [PubMed 16108726]).[supplied by OMIM, Dec 2008]
ENSG00000187513	Sinusoidal	GJA4	Gap junction protein, alpha 4, 37kDa	4.1	This gene encodes a member of the connexin gene family. The encoded protein is a component of gap junctions, which are composed of arrays of intercellular channels that provide a route for the diffusion of low molecular weight materials from cell to cell. Mutations in this gene have been associated with atherosclerosis and a higher risk of myocardial infarction. [provided by RefSeq, Jul 2008]
ENSG00000106571	Sinusoidal	GLI3	GLI family zinc finger 3	0.1	This gene encodes a protein which belongs to the C2H2-type zinc finger proteins subclass of the Gli family. They are characterized as DNA-binding transcription factors and are mediators of Sonic hedgehog (Shh) signaling. The protein encoded by this gene localizes in the cytoplasm and activates patched Drosophila homolog (PTCH) gene expression. It is also thought to play a role during embryogenesi…
ENSG00000174021	Sinusoidal	GNG5	Guanine nucleotide binding protein (G protein), gamma 5	37.9	G proteins are trimeric (alpha-beta-gamma) membrane-associated proteins that regulate flow of information from cell surface receptors to a variety of internal metabolic effectors. Interaction of a G protein with its activated receptor promotes exchange of GTP for GDP that is bound to the alpha subunit. The alpha-GTP complex dissociates from the beta-gamma heterodimer so that the subunits, in turn…
ENSG00000155265	Sinusoidal	GOLGA7B	Golgin A7 family, member B	0
ENSG00000125388	Sinusoidal	GRK4	G protein-coupled receptor kinase 4	0.5	This gene encodes a member of the guanine nucleotide-binding protein (G protein)-coupled receptor kinase subfamily of the Ser/Thr protein kinase family. The protein phosphorylates the activated forms of G protein-coupled receptors thus initiating its deactivation. This gene has been linked to both genetic and acquired hypertension. Several transcript variants encoding different isoforms have been…
ENSG00000105723	Sinusoidal	GSK3A	Glycogen synthase kinase 3 alpha	6.8	This gene encodes a multifunctional Ser/Thr protein kinase that is implicated in the control of several regulatory proteins including glycogen synthase, and transcription factors, such as JUN. It also plays a role in the WNT and PI3K signaling pathways, as well as regulates the production of beta-amyloid peptides associated with Alzheimer's disease. [provided by RefSeq, Oct 2011]
ENSG00000188342	Sinusoidal	GTF2F2	General transcription factor IIF, polypeptide 2, 30kDa	4.3
ENSG00000111727	Sinusoidal	HCFC2	Host cell factor C2	2.4	This gene encodes one of two proteins which interact with VP16, a herpes simplex virus protein that initiates virus infection. Both the encoded protein and the original Herpes host cell factor interact with VP16 through a beta-propeller domain. The original Herpes host cell factor, however, is effective at initiating viral infection while the encoded protein is not. Transcripts of varying length …
ENSG00000184357	Sinusoidal	HIST1H1B	Histone cluster 1, H1b	0	Histones are basic nuclear proteins responsible for nucleosome structure of the chromosomal fiber in eukaryotes. Two molecules of each of the four core histones (H2A, H2B, H3, and H4) form an octamer, around which approximately 146 bp of DNA is wrapped in repeating units, called nucleosomes. The linker histone, H1, interacts with linker DNA between nucleosomes and functions in the compaction of c…
ENSG00000168298	Sinusoidal	HIST1H1E	Histone cluster 1, H1e	0	Histones are basic nuclear proteins responsible for nucleosome structure of the chromosomal fiber in eukaryotes. Two molecules of each of the four core histones (H2A, H2B, H3, and H4) form an octamer, around which approximately 146 bp of DNA is wrapped in repeating units, called nucleosomes. The linker histone, H1, interacts with linker DNA between nucleosomes and functions in the compaction of c…
ENSG00000203814	Sinusoidal	HIST2H2BF	Histone cluster 2, H2bf	0.3	Histones are basic nuclear proteins that are responsible for the nucleosome structure of the chromosomal fiber in eukaryotes. This structure consists of approximately 146 bp of DNA wrapped around a nucleosome, an octamer composed of pairs of each of the four core histones (H2A, H2B, H3, and H4). The chromatin fiber is further compacted through the interaction of a linker histone, H1, with the DNA…
ENSG00000113161	Sinusoidal	HMGCR	3-hydroxy-3-methylglutaryl-CoA reductase	20.6	HMG-CoA reductase is the rate-limiting enzyme for cholesterol synthesis and is regulated via a negative feedback mechanism mediated by sterols and non-sterol metabolites derived from mevalonate, the product of the reaction catalyzed by reductase. Normally in mammalian cells this enzyme is suppressed by cholesterol derived from the internalization and degradation of low density lipoprotein (LDL) v…
ENSG00000169045	Sinusoidal	HNRNPH1	Heterogeneous nuclear ribonucleoprotein H1 (H)	63	This gene encodes a member of a subfamily of ubiquitously expressed heterogeneous nuclear ribonucleoproteins (hnRNPs). The hnRNPs are RNA binding proteins that complex with heterogeneous nuclear RNA. These proteins are associated with pre-mRNAs in the nucleus and appear to influence pre-mRNA processing and other aspects of mRNA metabolism and transport. While all of the hnRNPs are present in the …
ENSG00000107521	Sinusoidal	HPS1	Hermansky-Pudlak syndrome 1	3	This gene encodes a protein that may play a role in organelle biogenesis associated with melanosomes, platelet dense granules, and lysosomes. The encoded protein is a component of three different protein complexes termed biogenesis of lysosome-related organelles complex (BLOC)-3, BLOC4, and BLOC5. Mutations in this gene are associated with Hermansky-Pudlak syndrome type 1. Multiple transcript var…
ENSG00000115317	Sinusoidal	HTRA2	HtrA serine peptidase 2	1.8	This gene encodes a serine protease. The protein has been localized in the endoplasmic reticulum and interacts with an alternatively spliced form of mitogen-activated protein kinase 14. The protein has also been localized to the mitochondria with release to the cytosol following apoptotic stimulus. The protein is thought to induce apoptosis by binding the apoptosis inhibitory protein baculoviral …
ENSG00000076662	Sinusoidal	ICAM3	Intercellular adhesion molecule 3	18	The protein encoded by this gene is a member of the intercellular adhesion molecule (ICAM) family. All ICAM proteins are type I transmembrane glycoproteins, contain 2-9 immunoglobulin-like C2-type domains, and bind to the leukocyte adhesion LFA-1 protein. This protein is constitutively and abundantly expressed by all leucocytes and may be the most important ligand for LFA-1 in the initiation of t…
ENSG00000185885	Sinusoidal	IFITM1	Interferon induced transmembrane protein 1	57.6
ENSG00000254709	Sinusoidal	IGLL5	Immunoglobulin lambda-like polypeptide 5	9.5	This gene encodes one of the immunoglobulin lambda-like polypeptides. It is located within the immunoglobulin lambda locus but it does not require somatic rearrangement for expression. The first exon of this gene is unrelated to immunoglobulin variable genes; the second and third exons are the immunoglobulin lambda joining 1 and the immunoglobulin lambda constant 1 gene segments. Alternative spli…
ENSG00000115594	Sinusoidal	IL1R1	Interleukin 1 receptor, type I	28.5	This gene encodes a cytokine receptor that belongs to the interleukin-1 receptor family. The encoded protein is a receptor for interleukin-1 alpha, interleukin-1 beta, and interleukin-1 receptor antagonist. It is an important mediator involved in many cytokine-induced immune and inflammatory responses. This gene is located in a cluster of related cytokine receptor genes on chromosome 2q12. [provi…
ENSG00000189108	Sinusoidal	IL1RAPL2	Interleukin 1 receptor accessory protein-like 2	0.2	The protein encoded by this gene is a member of the interleukin 1 receptor family. This protein is similar to the interleukin 1 accessory proteins, and is most closely related to interleukin 1 receptor accessory protein-like 1 (IL1RAPL1). This gene and IL1RAPL1 are located at a region on chromosome X that is associated with X-linked non-syndromic mental retardation. [provided by RefSeq, Jul 2008]
ENSG00000153487	Sinusoidal	ING1	Inhibitor of growth family, member 1	5.1	This gene encodes a tumor suppressor protein that can induce cell growth arrest and apoptosis. The encoded protein is a nuclear protein that physically interacts with the tumor suppressor protein TP53 and is a component of the p53 signaling pathway. Reduced expression and rearrangement of this gene have been detected in various cancers. Multiple alternatively spliced transcript variants encoding …
ENSG00000173389	Sinusoidal	IQCF1	IQ motif containing F1	0
ENSG00000140678	Sinusoidal	ITGAX	Integrin, alpha X (complement component 3 receptor 4 subunit)	2.6	This gene encodes the integrin alpha X chain protein. Integrins are heterodimeric integral membrane proteins composed of an alpha chain and a beta chain. This protein combines with the beta 2 chain (ITGB2) to form a leukocyte-specific integrin referred to as inactivated-C3b (iC3b) receptor 4 (CR4). The alpha X beta 2 complex seems to overlap the properties of the alpha M beta 2 integrin in the ad…
ENSG00000205730	Sinusoidal	ITPRIPL2	Inositol 1,4,5-trisphosphate receptor interacting protein-like 2	2.6
ENSG00000197256	Sinusoidal	KANK2	KN motif and ankyrin repeat domains 2	19.8
ENSG00000143105	Sinusoidal	KCNA10	Potassium voltage-gated channel, shaker-related subfamily, member 10	0	Potassium channels represent the most complex class of voltage-gated ion channels from both functional and structural standpoints. Their diverse functions include regulating neurotransmitter release, heart rate, insulin secretion, neuronal excitability, epithelial electrolyte transport, smooth muscle contraction, and cell volume. Four sequence-related potassium channel genes - shaker, shaw, shab,…
ENSG00000168676	Sinusoidal	KCTD19	Potassium channel tetramerization domain containing 19	0
ENSG00000174145	Sinusoidal	KIAA1239	KIAA1239	0
ENSG00000068796	Sinusoidal	KIF2A	Kinesin heavy chain member 2A	2.3	The protein encoded by this gene is a plus end-directed motor required for normal mitotic progression. The encoded protein is required for normal spindle activity during mitosis and is necessary for normal brain development. Several transcript variants encoding different isoforms have been found for this gene. [provided by RefSeq, Sep 2011]
ENSG00000169035	Sinusoidal	KLK7	Kallikrein-related peptidase 7	0	This gene encodes a member of the kallikrein subfamily of serine proteases. These enzymes have diverse physiological functions and many kallikrein genes are biomarkers for cancer. The encoded protein has chymotrypsin-like activity and plays a role in the proteolysis of intercellular cohesive structures that precedes desquamation, the shedding of the outermost layer of the epidermis. The encoded p…
ENSG00000058085	Sinusoidal	LAMC2	Laminin, gamma 2	0.3	Laminins, a family of extracellular matrix glycoproteins, are the major noncollagenous constituent of basement membranes. They have been implicated in a wide variety of biological processes including cell adhesion, differentiation, migration, signaling, neurite outgrowth and metastasis. Laminins, composed of 3 non identical chains: laminin alpha, beta and gamma (formerly A, B1, and B2, respective…
ENSG00000172954	Sinusoidal	LCLAT1	Lysocardiolipin acyltransferase 1	2.7
ENSG00000100097	Sinusoidal	LGALS1	Lectin, galactoside-binding, soluble, 1	110.7	The galectins are a family of beta-galactoside-binding proteins implicated in modulating cell-cell and cell-matrix interactions. This gene product may act as an autocrine negative growth factor that regulates cell proliferation. [provided by RefSeq, Jul 2008]
ENSG00000131981	Sinusoidal	LGALS3	Lectin, galactoside-binding, soluble, 3	10.8	This gene encodes a member of the galectin family of carbohydrate binding proteins. Members of this protein family have an affinity for beta-galactosides. The encoded protein is characterized by an N-terminal proline-rich tandem repeat domain and a single C-terminal carbohydrate recognition domain. This protein can self-associate through the N-terminal domain allowing it to bind to multivalent sa…
ENSG00000171916	Sinusoidal	LGALS9C	Lectin, galactoside-binding, soluble, 9C	0.1	This gene was initially thought to represent a pseudogene of galectin 9; however, this transcript has good exon-intron structure and encodes a predicted protein of the same size as and highly similar to galectin 9. This gene is one of two similar loci on chromosome 17p similar to galectin 9 and now thought to be protein-encoding. This gene is the more telomeric gene. [provided by RefSeq, Jul 2008]
ENSG00000189067	Sinusoidal	LITAF	Lipopolysaccharide-induced TNF factor	43.9	Lipopolysaccharide is a potent stimulator of monocytes and macrophages, causing secretion of tumor necrosis factor-alpha (TNF-alpha) and other inflammatory mediators. This gene encodes lipopolysaccharide-induced TNF-alpha factor, which is a DNA-binding protein and can mediate the TNF-alpha expression by direct binding to the promoter region of the TNF-alpha gene. The transcription of this gene is…
ENSG00000186001	Sinusoidal	LRCH3	Leucine-rich repeats and calponin homology (CH) domain containing 3	3.5
ENSG00000184434	Sinusoidal	LRRC19	Leucine rich repeat containing 19	0.3
ENSG00000204482	Sinusoidal	LST1	Leukocyte specific transcript 1	15.5
ENSG00000090382	Sinusoidal	LYZ	Lysozyme	70.4	This gene encodes human lysozyme, whose natural substrate is the bacterial cell wall peptidoglycan (cleaving the beta[1-4]glycosidic linkages between N-acetylmuramic acid and N-acetylglucosamine). Lysozyme is one of the antimicrobial agents found in human milk, and is also present in spleen, lung, kidney, white blood cells, plasma, saliva, and tears. The protein has antibacterial activity against…
ENSG00000198909	Sinusoidal	MAP3K3	Mitogen-activated protein kinase kinase kinase 3	3	This gene product is a 626-amino acid polypeptide that is 96.5% identical to mouse Mekk3. Its catalytic domain is closely related to those of several other kinases, including mouse Mekk2, tobacco NPK, and yeast Ste11. Northern blot analysis revealed a 4.6-kb transcript that appears to be ubiquitously expressed. This protein directly regulates the stress-activated protein kinase (SAPK) and extrace…
ENSG00000100030	Sinusoidal	MAPK1	Mitogen-activated protein kinase 1	9.8	This gene encodes a member of the MAP kinase family. MAP kinases, also known as extracellular signal-regulated kinases (ERKs), act as an integration point for multiple biochemical signals, and are involved in a wide variety of cellular processes such as proliferation, differentiation, transcription regulation and development. The activation of this kinase requires its phosphorylation by upstream …
ENSG00000050748	Sinusoidal	MAPK9	Mitogen-activated protein kinase 9	6.2	The protein encoded by this gene is a member of the MAP kinase family. MAP kinases act as an integration point for multiple biochemical signals, and are involved in a wide variety of cellular processes such as proliferation, differentiation, transcription regulation and development. This kinase targets specific transcription factors, and thus mediates immediate-early gene expression in response t…
ENSG00000101367	Sinusoidal	MAPRE1	Microtubule-associated protein, RP/EB family, member 1	12.7	The protein encoded by this gene was first identified by its binding to the APC protein which is often mutated in familial and sporadic forms of colorectal cancer. This protein localizes to microtubules, especially the growing ends, in interphase cells. During mitosis, the protein is associated with the centrosomes and spindle microtubules. The protein also associates with components of the dynac…
ENSG00000065328	Sinusoidal	MCM10	Minichromosome maintenance complex component 10	0.4	The protein encoded by this gene is one of the highly conserved mini-chromosome maintenance proteins (MCM) that are involved in the initiation of eukaryotic genome replication. The hexameric protein complex formed by MCM proteins is a key component of the pre-replication complex (pre-RC) and it may be involved in the formation of replication forks and in the recruitment of other DNA replication r…
ENSG00000163875	Sinusoidal	MEAF6	MYST/Esa1-associated factor 6	24.5	This gene encodes a nuclear protein involved in transcriptional activation. The encoded protein may form a component of several different histone acetyltransferase complexes. There is a pseudogene for this gene on chromosome 2. Alternative splicing results in multiple transcript variants. [provided by RefSeq, Aug 2012]
ENSG00000184634	Sinusoidal	MED12	Mediator complex subunit 12	2.4	The initiation of transcription is controlled in part by a large protein assembly known as the preinitiation complex. A component of this preinitiation complex is a 1.2 MDa protein aggregate called Mediator. This Mediator component binds with a CDK8 subcomplex which contains the protein encoded by this gene, mediator complex subunit 12 (MED12), along with MED13, CDK8 kinase, and cyclin C. The CDK…
ENSG00000134138	Sinusoidal	MEIS2	Meis homeobox 2	4.4	This gene encodes a homeobox protein belonging to the TALE ('three amino acid loop extension') family of homeodomain-containing proteins. TALE homeobox proteins are highly conserved transcription regulators, and several members have been shown to be essential contributors to developmental programs. Multiple transcript variants encoding distinct isoforms have been described for this gene. [provide…
ENSG00000161013	Sinusoidal	MGAT4B	Mannosyl (alpha-1,3-)-glycoprotein beta-1,4-N-acetylglucosaminyltransferase, isozyme B	56.7	This gene encodes a key glycosyltransferase that regulates the formation of tri- and multiantennary branching structures in the Golgi apparatus. The encoded protein, in addition to the related isoenzyme A, catalyzes the transfer of N-acetylglucosamine (GlcNAc) from UDP-GlcNAc in a beta-1,4 linkage to the Man-alpha-1,3-Man-beta-1,4-GlcNAc arm of R-Man-alpha-1,6(GlcNAc-beta-1,2-Man-alpha-1,3)Man-be…
ENSG00000130396	Sinusoidal	MLLT4	Myeloid/lymphoid or mixed-lineage leukemia (trithorax homolog, Drosophila); translocated to, 4	25.3	This gene encodes a multi-domain protein involved in signaling and organization of cell junctions during embryogenesis. It has also been identified as the fusion partner of acute lymphoblastic leukemia (ALL-1) gene, involved in acute myeloid leukemias with t(6;11)(q27;q23) translocation. Alternatively spliced transcript variants encoding different isoforms have been described for this gene, howev…
ENSG00000118113	Sinusoidal	MMP8	Matrix metallopeptidase 8 (neutrophil collagenase)	0.6	Proteins of the matrix metalloproteinase (MMP) family are involved in the breakdown of extracellular matrix in normal physiological processes, such as embryonic development, reproduction, and tissue remodeling, as well as in disease processes, such as arthritis and metastasis. Most MMP's are secreted as inactive proproteins which are activated when cleaved by extracellular proteinases. However, t…
ENSG00000100985	Sinusoidal	MMP9	Matrix metallopeptidase 9 (gelatinase B, 92kDa gelatinase, 92kDa type IV collagenase)	2.6	Proteins of the matrix metalloproteinase (MMP) family are involved in the breakdown of extracellular matrix in normal physiological processes, such as embryonic development, reproduction, and tissue remodeling, as well as in disease processes, such as arthritis and metastasis. Most MMP's are secreted as inactive proproteins which are activated when cleaved by extracellular proteinases. The enzyme…
ENSG00000005381	Sinusoidal	MPO	Myeloperoxidase	0.5	Myeloperoxidase (MPO) is a heme protein synthesized during myeloid differentiation that constitutes the major component of neutrophil azurophilic granules. Produced as a single chain precursor, myeloperoxidase is subsequently cleaved into a light and heavy chain. The mature myeloperoxidase is a tetramer composed of 2 light chains and 2 heavy chains. This enzyme produces hypohalous acids central t…
ENSG00000183617	Sinusoidal	MRPL54	Mitochondrial ribosomal protein L54	27.8	Mammalian mitochondrial ribosomal proteins are encoded by nuclear genes and help in protein synthesis within the mitochondrion. Mitochondrial ribosomes (mitoribosomes) consist of a small 28S subunit and a large 39S subunit. They have an estimated 75% protein to rRNA composition compared to prokaryotic ribosomes, where this ratio is reversed. Another difference between mammalian mitoribosomes and …
ENSG00000013364	Sinusoidal	MVP	Major vault protein	13.2	This gene encodes the major component of the vault complex. Vaults are multi-subunit ribonucleoprotein structures that may be involved in nucleo-cytoplasmic transport. The encoded protein may play a role in multiple cellular processes by regulating the MAP kinase, JAK/STAT and phosphoinositide 3-kinase/Akt signaling pathways. The encoded protein also plays a role in multidrug resistance, and expr…
ENSG00000085274	Sinusoidal	MYNN	Myoneurin	1.7	This gene encodes a member of the BTB/POZ and zinc finger domain-containing protein family that are involved in the control of gene expression. Alternative splicing results in multiple transcript variants and a pseudogene has been identified on chromosome 14. [provided by RefSeq, Jun 2010]
ENSG00000266714	Sinusoidal	MYO15B	Myosin XVB pseudogene
ENSG00000196535	Sinusoidal	MYO18A	Myosin XVIIIA	5.5
ENSG00000142347	Sinusoidal	MYO1F	Myosin IF	2.8
ENSG00000124920	Sinusoidal	MYRF	Myelin regulatory factor	2.2
ENSG00000124357	Sinusoidal	NAGK	N-acetylglucosamine kinase	16.4	This gene encodes a member of the N-acetylhexosamine kinase family. The encoded protein catalyzes the conversion of N-acetyl-D-glucosamine to N-acetyl-D-glucosamine 6-phosphate, and is the major mammalian enzyme which recovers amino sugars. [provided by RefSeq, Nov 2011]
ENSG00000105835	Sinusoidal	NAMPT	Nicotinamide phosphoribosyltransferase	64.6	This gene encodes a protein that catalyzes the condensation of nicotinamide with 5-phosphoribosyl-1-pyrophosphate to yield nicotinamide mononucleotide, one step in the biosynthesis of nicotinamide adenine dinucleotide. The protein belongs to the nicotinic acid phosphoribosyltransferase (NAPRTase) family and is thought to be involved in many important biological processes, including metabolism, st…
ENSG00000185049	Sinusoidal	NELFA	Negative elongation factor complex member A	2.9	This gene is expressed ubiquitously with higher levels in fetal than in adult tissues. It encodes a protein sharing 93% sequence identity with the mouse protein. Wolf-Hirschhorn syndrome (WHS) is a malformation syndrome associated with a hemizygous deletion of the distal short arm of chromosome 4. This gene is mapped to the 165 kb WHS critical region, and may play a role in the phenotype of the W…
ENSG00000120837	Sinusoidal	NFYB	Nuclear transcription factor Y, beta	11.4	The protein encoded by this gene is one subunit of a trimeric complex, forming a highly conserved transcription factor that binds with high specificity to CCAAT motifs in the promoter regions in a variety of genes. This gene product, subunit B, forms a tight dimer with the C subunit, a prerequisite for subunit A association. The resulting trimer binds to DNA with high specificity and affinity. Su…
ENSG00000215440	Sinusoidal	NPEPL1	Aminopeptidase-like 1	2.7
ENSG00000136243	Sinusoidal	NUPL2	Nucleoporin like 2	3.3
ENSG00000180909	Sinusoidal	OR52B1P	Olfactory receptor, family 52, subfamily B, member 1 pseudogene
ENSG00000196099	Sinusoidal	OR6M1	Olfactory receptor, family 6, subfamily M, member 1	0	Olfactory receptors interact with odorant molecules in the nose, to initiate a neuronal response that triggers the perception of a smell. The olfactory receptor proteins are members of a large family of G-protein-coupled receptors (GPCR) arising from single coding-exon genes. Olfactory receptors share a 7-transmembrane domain structure with many neurotransmitter and hormone receptors and are resp…
ENSG00000186440	Sinusoidal	OR6P1	Olfactory receptor, family 6, subfamily P, member 1	0	Olfactory receptors interact with odorant molecules in the nose, to initiate a neuronal response that triggers the perception of a smell. The olfactory receptor proteins are members of a large family of G-protein-coupled receptors (GPCR) arising from single coding-exon genes. Olfactory receptors share a 7-transmembrane domain structure with many neurotransmitter and hormone receptors and are resp…
ENSG00000083454	Sinusoidal	P2RX5	Purinergic receptor P2X, ligand-gated ion channel, 5	0.1	The product of this gene belongs to the family of purinoceptors for ATP. This receptor functions as a ligand-gated ion channel. Alternative splicing results in multiple transcript variants. Read-through transcription also exists between this gene and the neighboring downstream gene, TAX1BP3 (Tax1 binding protein 3). [provided by RefSeq, Mar 2011]
ENSG00000169313	Sinusoidal	P2RY12	Purinergic receptor P2Y, G-protein coupled, 12	0.5	The product of this gene belongs to the family of G-protein coupled receptors. This family has several receptor subtypes with different pharmacological selectivity, which overlaps in some cases, for various adenosine and uridine nucleotides. This receptor is involved in platelet aggregation, and is a potential target for the treatment of thromboembolisms and other clotting disorders. Mutations in…
ENSG00000175115	Sinusoidal	PACS1	Phosphofurin acidic cluster sorting protein 1	3.9	This gene encodes a protein with a putative role in the localization of trans-Golgi network (TGN) membrane proteins. Mouse and rat homologs have been identified and studies of the homologous rat protein indicate a role in directing TGN localization of furin by binding to the protease's phosphorylated cytosolic domain. In addition, the human protein plays a role in HIV-1 Nef-mediated downregulatio…
ENSG00000102699	Sinusoidal	PARP4	Poly (ADP-ribose) polymerase family, member 4	7.5	This gene encodes poly(ADP-ribosyl)transferase-like 1 protein, which is capable of catalyzing a poly(ADP-ribosyl)ation reaction. This protein has a catalytic domain which is homologous to that of poly (ADP-ribosyl) transferase, but lacks an N-terminal DNA binding domain which activates the C-terminal catalytic domain of poly (ADP-ribosyl) transferase. Since this protein is not capable of binding …
ENSG00000197702	Sinusoidal	PARVA	Parvin, alpha	8.2	This gene encodes a member of the parvin family of actin-binding proteins. Parvins are associated with focal contacts and contain calponin homology domains that bind to actin filaments. The encoded protein is part of the integrin-linked kinase signaling complex and plays a role in cell adhesion, motility and survival. [provided by RefSeq, Dec 2010]
ENSG00000179715	Sinusoidal	PCED1B	PC-esterase domain containing 1B	1	This gene encodes a protein that belongs to the GDSL/SGNH-like acyl-esterase family. Members of this family are hydrolases thought to function in modification of biopolymers on the cell surface. Alternate splicing results in multiple transcript variants encoding different isoforms. [provided by RefSeq, Jul 2013]
ENSG00000150593	Sinusoidal	PDCD4	Programmed cell death 4 (neoplastic transformation inhibitor)	17.9	This gene is a tumor suppressor and encodes a protein that binds to the eukaryotic translation initiation factor 4A1 and inhibits its function by preventing RNA binding. Alternative splicing results in multiple transcript variants. [provided by RefSeq, Dec 2010]
ENSG00000142655	Sinusoidal	PEX14	Peroxisomal biogenesis factor 14	7.8	This gene encodes an essential component of the peroxisomal import machinery. The protein is integrated into peroxisome membranes with its C-terminus exposed to the cytosol, and interacts with the cytosolic receptor for proteins containing a PTS1 peroxisomal targeting signal. The protein also functions as a transcriptional corepressor and interacts with a histone deacetylase. A mutation in this g…
ENSG00000108518	Sinusoidal	PFN1	Profilin 1	151.9	This gene encodes a member of the profilin family of small actin-binding proteins. The encoded protein plays an important role in actin dynamics by regulating actin polymerization in response to extracellular signals. Deletion of this gene is associated with Miller-Dieker syndrome, and the encoded protein may also play a role in Huntington disease. Multiple pseudogenes of this gene are located on…
ENSG00000196570	Sinusoidal	PFN3	Profilin 3	0	The product of this gene belongs to the profilin family of proteins. This protein binds to actin and affects the structure of the cytoskeleton. It also may be involved in spermatogenesis. It is a single exon gene. [provided by RefSeq, Jul 2008]
ENSG00000112419	Sinusoidal	PHACTR2	Phosphatase and actin regulator 2	3.8
ENSG00000119403	Sinusoidal	PHF19	PHD finger protein 19	2.4
ENSG00000104872	Sinusoidal	PIH1D1	PIH1 domain containing 1	14.7
ENSG00000205038	Sinusoidal	PKHD1L1	Polycystic kidney and hepatic disease 1 (autosomal recessive)-like 1	0.1
ENSG00000176485	Sinusoidal	PLA2G16	Phospholipase A2, group XVI	36
ENSG00000187091	Sinusoidal	PLCD1	Phospholipase C, delta 1	1.8	This gene encodes a member of the phospholipase C family. Phospholipase C isozymes play critical roles in intracellular signal transduction by catalyzing the hydrolysis of phosphatidylinositol 4,5-bisphosphate (PIP2) into the second messengers diacylglycerol (DAG) and inositol triphosphate (IP3). The encoded protein functions as a tumor suppressor in several types of cancer, and mutations in this…
ENSG00000068137	Sinusoidal	PLEKHH3	Pleckstrin homology domain containing, family H (with MyTH4 domain) member 3	1.4
ENSG00000176903	Sinusoidal	PNMA1	Paraneoplastic Ma antigen 1	2	This gene encodes a neuron- and testis-specific protein that is also expressed in some paraneoplastic syndromes affecting the nervous system. Some patients with neurologic disorders develop antibodies against the protein encoded by this gene. The identification of the antineuronal antibodies in the sera of these patients has facilitated the diagnosis of paraneoplastic neurological disorders and t…
ENSG00000032444	Sinusoidal	PNPLA6	Patatin-like phospholipase domain containing 6	4.6	This gene encodes a phospholipase that deacetylates intracellular phosphatidylcholine to produce glycerophosphocholine. It is thought to function in neurite outgrowth and process elongation during neuronal differentiation. The protein is anchored to the cytoplasmic face of the endoplasmic reticulum in both neurons and non-neuronal cells. Mutations in this gene result in autosomal recessive spasti…
ENSG00000068654	Sinusoidal	POLR1A	Polymerase (RNA) I polypeptide A, 194kDa	1
ENSG00000009830	Sinusoidal	POMT2	Protein-O-mannosyltransferase 2	0.9	The protein encoded by this gene is an O-mannosyltransferase that requires interaction with the product of the POMT1 gene for enzymatic function. The encoded protein is found in the membrane of the endoplasmic reticulum. Defects in this gene are a cause of Walker-Warburg syndrome (WWS).[provided by RefSeq, Oct 2008]
ENSG00000146112	Sinusoidal	PPP1R18	Protein phosphatase 1, regulatory subunit 18	8.9	Protein phosphatase-1 (PP1; see MIM 176875) interacts with regulatory subunits that target the enzyme to different cellular locations and change its activity toward specific substrates. Phostensin is a regulatory subunit that targets PP1 to F-actin (see MIM 102610) cytoskeleton (Kao et al., 2007 [PubMed 17374523]).[supplied by OMIM, Mar 2008]
ENSG00000131771	Sinusoidal	PPP1R1B	Protein phosphatase 1, regulatory (inhibitor) subunit 1B	0	This gene encodes a bifunctional signal transduction molecule. Dopaminergic and glutamatergic receptor stimulation regulates its phosphorylation and function as a kinase or phosphatase inhibitor. As a target for dopamine, this gene may serve as a therapeutic target for neurologic and psychiatric disorders. Multiple transcript variants encoding different isoforms have been found for this gene. [pr…
ENSG00000137713	Sinusoidal	PPP2R1B	Protein phosphatase 2, regulatory subunit A, beta	28.5	This gene encodes a constant regulatory subunit of protein phosphatase 2. Protein phosphatase 2 is one of the four major Ser/Thr phosphatases, and it is implicated in the negative control of cell growth and division. It consists of a common heteromeric core enzyme, which is composed of a catalytic subunit and a constant regulatory subunit, that associates with a variety of regulatory subunits. Th…
ENSG00000149923	Sinusoidal	PPP4C	Protein phosphatase 4, catalytic subunit	27
ENSG00000117450	Sinusoidal	PRDX1	Peroxiredoxin 1	241.8	This gene encodes a member of the peroxiredoxin family of antioxidant enzymes, which reduce hydrogen peroxide and alkyl hydroperoxides. The encoded protein may play an antioxidant protective role in cells, and may contribute to the antiviral activity of CD8(+) T-cells. This protein may have a proliferative effect and play a role in cancer development or progression. Four transcript variants encod…
ENSG00000188783	Sinusoidal	PRELP	Proline/arginine-rich end leucine-rich repeat protein	4.8	The protein encoded by this gene is a leucine-rich repeat protein present in connective tissue extracellular matrix. This protein functions as a molecule anchoring basement membranes to the underlying connective tissue. This protein has been shown to bind type I collagen to basement membranes and type II collagen to cartilage. It also binds the basement membrane heparan sulfate proteoglycan perle…
ENSG00000085377	Sinusoidal	PREP	Prolyl endopeptidase	7.5	The protein encoded by this gene is a cytosolic prolyl endopeptidase that cleaves peptide bonds on the C-terminal side of prolyl residues within peptides that are up to approximately 30 amino acids long. Prolyl endopeptidases have been reported to be involved in the maturation and degradation of peptide hormones and neuropeptides. [provided by RefSeq, Jul 2008]
ENSG00000163932	Sinusoidal	PRKCD	Protein kinase C, delta	2.8	Protein kinase C (PKC) is a family of serine- and threonine-specific protein kinases that can be activated by calcium and the second messenger diacylglycerol. PKC family members phosphorylate a wide variety of protein targets and are known to be involved in diverse cellular signaling pathways. PKC family members also serve as major receptors for phorbol esters, a class of tumor promoters. Each me…
ENSG00000171132	Sinusoidal	PRKCE	Protein kinase C, epsilon	6.3	Protein kinase C (PKC) is a family of serine- and threonine-specific protein kinases that can be activated by calcium and the second messenger diacylglycerol. PKC family members phosphorylate a wide variety of protein targets and are known to be involved in diverse cellular signaling pathways. PKC family members also serve as major receptors for phorbol esters, a class of tumor promoters. Each me…
ENSG00000178055	Sinusoidal	PRSS42	Protease, serine, 42	0
ENSG00000205220	Sinusoidal	PSMB10	Proteasome (prosome, macropain) subunit, beta type, 10	9.3	The proteasome is a multicatalytic proteinase complex with a highly ordered ring-shaped 20S core structure. The core structure is composed of 4 rings of 28 non-identical subunits; 2 rings are composed of 7 alpha subunits and 2 rings are composed of 7 beta subunits. Proteasomes are distributed throughout eukaryotic cells at a high concentration and cleave peptides in an ATP/ubiquitin-dependent pro…
ENSG00000072135	Sinusoidal	PTPN18	Protein tyrosine phosphatase, non-receptor type 18 (brain-derived)	6	The protein encoded by this gene is a member of the protein tyrosine phosphatase (PTP) family. PTPs are known to be signaling molecules that regulate a variety of cellular processes including cell growth, differentiation, the mitotic cycle, and oncogenic transformation. This PTP contains a PEST motif, which often serves as a protein-protein interaction domain, and may be related to protein intrac…
ENSG00000111679	Sinusoidal	PTPN6	Protein tyrosine phosphatase, non-receptor type 6	7.6	The protein encoded by this gene is a member of the protein tyrosine phosphatase (PTP) family. PTPs are known to be signaling molecules that regulate a variety of cellular processes including cell growth, differentiation, mitotic cycle, and oncogenic transformation. N-terminal part of this PTP contains two tandem Src homolog (SH2) domains, which act as protein phospho-tyrosine binding domains, an…
ENSG00000130508	Sinusoidal	PXDN	Peroxidasin homolog (Drosophila)	5.7	This gene encodes a heme-containing peroxidase that is secreted into the extracellular matrix. It is involved in extracellular matrix formation, and may function in the physiological and pathological fibrogenic response in fibrotic kidney. Mutations in this gene cause corneal opacification and other ocular anomalies, and also microphthalmia and anterior segment dysgenesis. [provided by RefSeq, Au…
ENSG00000134594	Sinusoidal	RAB33A	RAB33A, member RAS oncogene family	0.2	The protein encoded by this gene belongs to the small GTPase superfamily, Rab family. It is GTP-binding protein and may be involved in vesicle transport. [provided by RefSeq, Jul 2008]
ENSG00000091428	Sinusoidal	RAPGEF4	Rap guanine nucleotide exchange factor (GEF) 4	9.5
ENSG00000198774	Sinusoidal	RASSF9	Ras association (RalGDS/AF-6) domain family (N-terminal) member 9	0.4	The protein encoded by this gene localizes to perinuclear endosomes. This protein associates with peptidylglycine alpha-amidating monooxygenase, and may be involved with the trafficking of this enzyme through secretory or endosomal pathways. [provided by RefSeq, Jul 2008]
ENSG00000184863	Sinusoidal	RBM33	RNA binding motif protein 33	4.2
ENSG00000173933	Sinusoidal	RBM4	RNA binding motif protein 4	22.4
ENSG00000198771	Sinusoidal	RCSD1	RCSD domain containing 1	2.6
ENSG00000242732	Sinusoidal	RGAG4	Retrotransposon gag domain containing 4	0.2
ENSG00000067560	Sinusoidal	RHOA	Ras homolog family member A	99.9
ENSG00000176406	Sinusoidal	RIMS2	Regulating synaptic membrane exocytosis 2	0
ENSG00000204227	Sinusoidal	RING1	Ring finger protein 1	13.8	This gene belongs to the RING finger family, members of which encode proteins characterized by a RING domain, a zinc-binding motif related to the zinc finger domain. The gene product can bind DNA and can act as a transcriptional repressor. It is associated with the multimeric polycomb group protein complex. The gene product interacts with the polycomb group proteins BMI1, EDR1, and CBX4, and colo…
ENSG00000058729	Sinusoidal	RIOK2	RIO kinase 2	5.2
ENSG00000123091	Sinusoidal	RNF11	Ring finger protein 11	21.3	The protein encoded by this gene contains a RING-H2 finger motif, which is known to be important for protein-protein interactions. The expression of this gene has been shown to be induced by mutant RET proteins (MEN2A/MEN2B). The germline mutations in RET gene are known to be responsible for the development of multiple endocrine neoplasia (MEN). [provided by RefSeq, Jul 2008]
ENSG00000082996	Sinusoidal	RNF13	Ring finger protein 13	24.6	The protein encoded by this gene contains a RING zinc finger, a motif known to be involved in protein-protein interactions. The specific function of this gene has not yet been determined. Alternatively spliced transcript variants that encode the same protein have been reported. A pseudogene, which is also located on chromosome 3, has been defined for this gene. [provided by RefSeq, Jul 2008]
ENSG00000110315	Sinusoidal	RNF141	Ring finger protein 141	8	The protein encoded by this gene contains a RING finger, a motif known to be involved in protein-DNA and protein-protein interactions. Abundant expression of this gene was found in the testicular tissue of fertile men, but was not detected in azoospermic patients. Studies of the mouse counterpart suggest that this gene may function as a testis specific transcription factor during spermatogenesis.…
ENSG00000105982	Sinusoidal	RNF32	Ring finger protein 32	0.3	The protein encoded by this gene contains two RING ring finger motifs. RING finger motifs are present in a variety of functionally distinct proteins and are known to be involved in protein-DNA or protein-protein interactions. This gene was found to be expressed during spermatogenesis, most likely in spermatocytes and/or in spermatids. Several alternatively spliced transcript variants encoding the…
ENSG00000111880	Sinusoidal	RNGTT	RNA guanylyltransferase and 5'-phosphatase	2.9
ENSG00000067900	Sinusoidal	ROCK1	Rho-associated, coiled-coil containing protein kinase 1	6.3	This gene encodes a protein serine/threonine kinase that is activated when bound to the GTP-bound form of Rho. The small GTPase Rho regulates formation of focal adhesions and stress fibers of fibroblasts, as well as adhesion and aggregation of platelets and lymphocytes by shuttling between the inactive GDP-bound form and the active GTP-bound form. Rho is also essential in cytokinesis and plays a …
ENSG00000204814	Sinusoidal	RP11-160N1.10
ENSG00000271741	Sinusoidal	RP11-244H3.4
ENSG00000256500	Sinusoidal	RP11-73M18.2	Kinesin light chain 1	0.9	Conventional kinesin is a tetrameric molecule composed of two heavy chains and two light chains, and transports various cargos along microtubules toward their plus ends. The heavy chains provide the motor activity, while the light chains bind to various cargos. This gene encodes a member of the kinesin light chain family. It associates with kinesin heavy chain through an N-terminal domain, and si…
ENSG00000188846	Sinusoidal	RPL14	Ribosomal protein L14	21.2	Ribosomes, the organelles that catalyze protein synthesis, consist of a small 40S subunit and a large 60S subunit. Together these subunits are composed of 4 RNA species and approximately 80 structurally distinct proteins. This gene encodes a ribosomal protein that is a component of the 60S subunit. The protein belongs to the L14E family of ribosomal proteins. It contains a basic region-leucine zi…
ENSG00000197956	Sinusoidal	S100A6	S100 calcium binding protein A6	27.4	The protein encoded by this gene is a member of the S100 family of proteins containing 2 EF-hand calcium-binding motifs. S100 proteins are localized in the cytoplasm and/or nucleus of a wide range of cells, and involved in the regulation of a number of cellular processes such as cell cycle progression and differentiation. S100 genes include at least 13 members which are located as a cluster on ch…
ENSG00000163220	Sinusoidal	S100A9	S100 calcium binding protein A9	96	The protein encoded by this gene is a member of the S100 family of proteins containing 2 EF-hand calcium-binding motifs. S100 proteins are localized in the cytoplasm and/or nucleus of a wide range of cells, and involved in the regulation of a number of cellular processes such as cell cycle progression and differentiation. S100 genes include at least 13 members which are located as a cluster on ch…
ENSG00000169906	Sinusoidal	S100G	S100 calcium binding protein G	0	This gene encodes calbindin D9K, a vitamin D-dependent calcium-binding protein. This cytosolic protein belongs to a family of calcium-binding proteins that includes calmodulin, parvalbumin, troponin C, and S100 protein. In the intestine, the protein is vitamin D-dependent and its expression correlates with calcium transport activity. The protein may increase Ca2+ absorption by buffering Ca2+ in t…
ENSG00000006747	Sinusoidal	SCIN	Scinderin	0	SCIN is a Ca(2+)-dependent actin-severing and -capping protein (Zunino et al., 2001 [PubMed 11568009]).[supplied by OMIM, May 2010]
ENSG00000137575	Sinusoidal	SDCBP	Syndecan binding protein (syntenin)	58.7	The protein encoded by this gene was initially identified as a molecule linking syndecan-mediated signaling to the cytoskeleton. The syntenin protein contains tandemly repeated PDZ domains that bind the cytoplasmic, C-terminal domains of a variety of transmembrane proteins. This protein may also affect cytoskeletal-membrane organization, cell adhesion, protein trafficking, and the activation of t…
ENSG00000143751	Sinusoidal	SDE2	SDE2 telomere maintenance homolog (S. pombe)	6.2
ENSG00000132432	Sinusoidal	SEC61G	Sec61 gamma subunit	72.6	The Sec61 complex is the central component of the protein translocation apparatus of the endoplasmic reticulum (ER) membrane. Oligomers of the Sec61 complex form a transmembrane channel where proteins are translocated across and integrated into the ER membrane. This complex consists of three membrane proteins- alpha, beta, and gamma. This gene encodes the gamma-subunit protein. Alternatively spli…
ENSG00000138758	Sinusoidal	SEP11	Septin 11	14	SEPT11 belongs to the conserved septin family of filament-forming cytoskeletal GTPases that are involved in a variety of cellular functions including cytokinesis and vesicle trafficking (Hanai et al., 2004 [PubMed 15196925]; Nagata et al., 2004 [PubMed 15485874]).[supplied by OMIM, Jul 2009]
ENSG00000197249	Sinusoidal	SERPINA1	Serpin peptidase inhibitor, clade A (alpha-1 antiproteinase, antitrypsin), member 1	11159.4	The protein encoded by this gene is secreted and is a serine protease inhibitor whose targets include elastase, plasmin, thrombin, trypsin, chymotrypsin, and plasminogen activator. Defects in this gene can cause emphysema or liver disease. Several transcript variants encoding the same protein have been found for this gene. [provided by RefSeq, Jul 2008]
ENSG00000206075	Sinusoidal	SERPINB5	Serpin peptidase inhibitor, clade B (ovalbumin), member 5	0
ENSG00000106366	Sinusoidal	SERPINE1	Serpin peptidase inhibitor, clade E (nexin, plasminogen activator inhibitor type 1), member 1	199.2	This gene encodes a member of the serine proteinase inhibitor (serpin) superfamily. This member is the principal inhibitor of tissue plasminogen activator (tPA) and urokinase (uPA), and hence is an inhibitor of fibrinolysis. Defects in this gene are the cause of plasminogen activator inhibitor-1 deficiency (PAI-1 deficiency), and high concentrations of the gene product are associated with thrombo…
ENSG00000185917	Sinusoidal	SETD4	SET domain containing 4	1.5
ENSG00000198818	Sinusoidal	SFT2D1	SFT2 domain containing 1	8.1
ENSG00000118473	Sinusoidal	SGIP1	SH3-domain GRB2-like (endophilin) interacting protein 1	0.2	SGIP1 functions as an endocytic protein that affects signaling by receptors in neuronal systems involved in energy homeostasis via its interaction with endophilins (see SH3GL3; MIM 603362) (Trevaskis et al., 2005 [PubMed 15919751] and Uezu et al., 2007 [PubMed 17626015]).[supplied by OMIM, Mar 2008]
ENSG00000111252	Sinusoidal	SH2B3	SH2B adaptor protein 3	7	This gene encodes a member of the SH2B adaptor family of proteins, which are involved in a range of signaling activities by growth factor and cytokine receptors. The encoded protein is a key negative regulator of cytokine signaling and plays a critical role in hematopoiesis. Mutations in this gene have been associated with susceptibility to celiac disease type 13 and susceptibility to insulin-dep…
ENSG00000095370	Sinusoidal	SH2D3C	SH2 domain containing 3C	0.9	This gene encodes an adaptor protein and member of a cytoplasmic protein family involved in cell migration. The encoded protein contains a putative Src homology 2 (SH2) domain and guanine nucleotide exchange factor-like domain which allows this signaling protein to form a complex with scaffolding protein Crk-associated substrate. Multiple transcript variants encoding different isoforms have been …
ENSG00000131171	Sinusoidal	SH3BGRL	SH3 domain binding glutamic acid-rich protein like	19.1
ENSG00000214193	Sinusoidal	SH3D21	SH3 domain containing 21	0.2
ENSG00000105501	Sinusoidal	SIGLEC5	Sialic acid binding Ig-like lectin 5	0.4	This gene encodes a member of the sialic acid-binding immunoglobulin-like lectin (Siglec) family. These cell surface lectins are characterized by structural motifs in the immunoglobulin (Ig)-like domains and sialic acid recognition sites in the first Ig V set domain. The encoded protein is a member of the CD33-related subset of Siglecs and inhibits the activation of several cell types including m…
ENSG00000198053	Sinusoidal	SIRPA	Signal-regulatory protein alpha	10	The protein encoded by this gene is a member of the signal-regulatory-protein (SIRP) family, and also belongs to the immunoglobulin superfamily. SIRP family members are receptor-type transmembrane glycoproteins known to be involved in the negative regulation of receptor tyrosine kinase-coupled signaling processes. This protein can be phosphorylated by tyrosine kinases. The phospho-tyrosine residu…
ENSG00000182628	Sinusoidal	SKA2	Spindle and kinetochore associated complex subunit 2	8.2
ENSG00000253598	Sinusoidal	SLC10A5	Solute carrier family 10, member 5	2
ENSG00000173262	Sinusoidal	SLC2A14	Solute carrier family 2 (facilitated glucose transporter), member 14	0.8	Members of the glucose transporter (GLUT) family, including SLC2A14, are highly conserved integral membrane proteins that transport hexoses such as glucose and fructose into all mammalian cells. GLUTs show tissue and cell-type specific expression (Wu and Freeze, 2002 [PubMed 12504846]).[supplied by OMIM, Mar 2008]
ENSG00000131183	Sinusoidal	SLC34A1	Solute carrier family 34 (type II sodium/phosphate contransporter), member 1	0.3	This gene encodes a member of the type II sodium-phosphate cotransporter family. Mutations in this gene are associated with hypophosphatemia nephrolithiasis/osteoporosis 1. Alternative splicing results in multiple transcript variants. [provided by RefSeq, Nov 2009]
ENSG00000127616	Sinusoidal	SMARCA4	SWI/SNF related, matrix associated, actin dependent regulator of chromatin, subfamily a, member 4	2.3	The protein encoded by this gene is a member of the SWI/SNF family of proteins and is similar to the brahma protein of Drosophila. Members of this family have helicase and ATPase activities and are thought to regulate transcription of certain genes by altering the chromatin structure around those genes. The encoded protein is part of the large ATP-dependent chromatin remodeling complex SNF/SWI, w…
ENSG00000168502	Sinusoidal	SOGA2	SOGA family member 2	0.4
ENSG00000170374	Sinusoidal	SP7	Sp7 transcription factor	0	This gene encodes a member of the Sp subfamily of Sp/XKLF transcription factors. Sp family proteins are sequence-specific DNA-binding proteins characterized by an amino-terminal trans-activation domain and three carboxy-terminal zinc finger motifs. This protein is a bone specific transcription factor and is required for osteoblast differentiation and bone formation.[provided by RefSeq, Jul 2010]
ENSG00000061656	Sinusoidal	SPAG4	Sperm associated antigen 4	0.6	The mammalian sperm flagellum contains two cytoskeletal structures associated with the axoneme: the outer dense fibers surrounding the axoneme in the midpiece and principal piece and the fibrous sheath surrounding the outer dense fibers in the principal piece of the tail. Defects in these structures are associated with abnormal tail morphology, reduced sperm motility, and infertility. In the rat,…
ENSG00000128487	Sinusoidal	SPECC1	Sperm antigen with calponin homology and coiled-coil domains 1	0.7	The protein encoded by this gene belongs to the cytospin-A family. It is localized in the nucleus, and highly expressed in testis and some cancer cell lines. A chromosomal translocation involving this gene and platelet-derived growth factor receptor, beta gene (PDGFRB) may be a cause of juvenile myelomonocytic leukemia. Alternatively spliced transcript variants encoding different isoforms have be…
ENSG00000066336	Sinusoidal	SPI1	Spleen focus forming virus (SFFV) proviral integration oncogene	8.6	This gene encodes an ETS-domain transcription factor that activates gene expression during myeloid and B-lymphoid cell development. The nuclear protein binds to a purine-rich sequence known as the PU-box found near the promoters of target genes, and regulates their expression in coordination with other transcription factors and cofactors. The protein can also regulate alternative splicing of targ…
ENSG00000269404	Sinusoidal	SPIB	Spi-B transcription factor (Spi-1/PU.1 related)	0.5	The protein encoded by this gene is a transcriptional activator that binds to the PU-box (5'-GAGGAA-3') and acts as a lymphoid-specific enhancer. Four transcript variants encoding different isoforms have been found for this gene. [provided by RefSeq, Sep 2011]
ENSG00000204271	Sinusoidal	SPIN3	Spindlin family, member 3	0.5
ENSG00000197471	Sinusoidal	SPN	Sialophorin	0.7	The protein encoded by this gene is a major sialoglycoprotein found on the surface of thymocytes, T lymphocytes, monocytes, granulocytes, and some B lymphocytes. It may be part of a physiologic ligand-receptor complex involved in T-cell activation. During T-cell activation, this protein is actively removed from the T-cell-APC (antigen-presenting cell) contact site, suggesting a negative regulator…
ENSG00000070182	Sinusoidal	SPTB	Spectrin, beta, erythrocytic	0	This locus encodes a member of the spectrin gene family. Spectrin proteins, along with ankyrin, play a role in cell membrane organization and stability. The protein encoded by this locus functions in stability of erythrocyte membranes, and mutations in this gene have been associated with spherocytosis type 2, hereditary elliptocytosis, and neonatal hemolytic anemia. Alternatively spliced transcri…
ENSG00000122862	Sinusoidal	SRGN	Serglycin	88.5	This gene encodes a protein best known as a hematopoietic cell granule proteoglycan. Proteoglycans stored in the secretory granules of many hematopoietic cells also contain a protease-resistant peptide core, which may be important for neutralizing hydrolytic enzymes. This encoded protein was found to be associated with the macromolecular complex of granzymes and perforin, which may serve as a med…
ENSG00000184895	Sinusoidal	SRY	Sex determining region Y	0	This intronless gene encodes a transcription factor that is a member of the high mobility group (HMG)-box family of DNA-binding proteins. This protein is the testis-determining factor (TDF), which initiates male sex determination. Mutations in this gene give rise to XY females with gonadal dysgenesis (Swyer syndrome); translocation of part of the Y chromosome containing this gene to the X chromos…
ENSG00000110080	Sinusoidal	ST3GAL4	ST3 beta-galactoside alpha-2,3-sialyltransferase 4	7.4	This gene encodes a member of the glycosyltransferase 29 family, a group of enzymes involved in protein glycosylation. The encoded protein is targeted to Golgi membranes but may be proteolytically processed and secreted. The gene product may also be involved in the increased expression of sialyl Lewis X antigen seen in inflammatory responses. Multiple transcript variants encoding different isofor…
ENSG00000073849	Sinusoidal	ST6GAL1	ST6 beta-galactosamide alpha-2,6-sialyltranferase 1	153.7	This gene encodes a member of glycosyltransferase family 29. The encoded protein is a type II membrane protein that catalyzes the transfer of sialic acid from CMP-sialic acid to galactose-containing substrates. The protein, which is normally found in the Golgi but can be proteolytically processed to a soluble form, is involved in the generation of the cell-surface carbohydrate determinants and di…
ENSG00000126561	Sinusoidal	STAT5A	Signal transducer and activator of transcription 5A	2.9	The protein encoded by this gene is a member of the STAT family of transcription factors. In response to cytokines and growth factors, STAT family members are phosphorylated by the receptor associated kinases, and then form homo- or heterodimers that translocate to the cell nucleus where they act as transcription activators. This protein is activated by, and mediates the responses of many cell li…
ENSG00000118046	Sinusoidal	STK11	Serine/threonine kinase 11	5.2	This gene, which encodes a member of the serine/threonine kinase family, regulates cell polarity and functions as a tumor suppressor. Mutations in this gene have been associated with Peutz-Jeghers syndrome, an autosomal dominant disorder characterized by the growth of polyps in the gastrointestinal tract, pigmented macules on the skin and mouth, and other neoplasms. Alternate transcriptional spli…
ENSG00000101109	Sinusoidal	STK4	Serine/threonine kinase 4	3.6	The protein encoded by this gene is a cytoplasmic kinase that is structurally similar to the yeast Ste20p kinase, which acts upstream of the stress-induced mitogen-activated protein kinase cascade. The encoded protein can phosphorylate myelin basic protein and undergoes autophosphorylation. A caspase-cleaved fragment of the encoded protein has been shown to be capable of phosphorylating histone H…
ENSG00000146857	Sinusoidal	STRA8	Stimulated by retinoic acid 8	0	This gene encodes a retinoic acid-responsive protein. A homologous protein in mouse has been shown to be involved in the regulation of meiotic initiation in both spermatogenesis and oogenesis, though feature differences between the mouse and human proteins suggest that these homologs are not entirely functionally equivalent. It is thought that this gene may play a role in spermatogenesis in human…
ENSG00000103266	Sinusoidal	STUB1	STIP1 homology and U-box containing protein 1, E3 ubiquitin protein ligase	23.8	This gene encodes a protein containing tetratricopeptide repeat and a U-box that functions as a ubiquitin ligase/cochaperone. The encoded protein binds to and ubiquitinates shock cognate 71 kDa protein (Hspa8) and DNA polymerase beta (Polb), among other targets. Mutations in this gene cause spinocerebellar ataxia, autosomal recessive 16. Alternative splicing results in multiple transcript variant…
ENSG00000137573	Sinusoidal	SULF1	Sulfatase 1	0.7	This gene encodes an extracellular heparan sulfate endosulfatase. The encoded enzyme selectively removes 6-O-sulfate groups from heparan sulfate chains of heparan sulfate proteoglycans (HSPGs). The enzyme is secreted through the Golgi and is subsequently localized to the cell surface. The expression of this gene may be down-regulated in several types of cancer, including hepatocellular (HCC), ova…
ENSG00000188612	Sinusoidal	SUMO2	Small ubiquitin-like modifier 2	46.5	This gene encodes a protein that is a member of the SUMO (small ubiquitin-like modifier) protein family. It functions in a manner similar to ubiquitin in that it is bound to target proteins as part of a post-translational modification system. However, unlike ubiquitin which targets proteins for degradation, this protein is involved in a variety of cellular processes, such as nuclear transport, tr…
ENSG00000177688	Sinusoidal	SUMO4	Small ubiquitin-like modifier 4	0.2	This gene is a member of the SUMO gene family. This family of genes encode small ubiquitin-related modifiers that are attached to proteins and control the target proteins' subcellular localization, stability, or activity. The protein described in this record is located in the cytoplasm and specifically modifies IKBA, leading to negative regulation of NF-kappa-B-dependent transcription of the IL12…
ENSG00000143028	Sinusoidal	SYPL2	Synaptophysin-like 2	2.8
ENSG00000092607	Sinusoidal	TBX15	T-box 15	21.5	This gene belongs to the T-box family of genes, which encode a phylogenetically conserved family of transcription factors that regulate a variety of developmental processes. All these genes contain a common T-box DNA-binding domain. Mutations in this gene are associated with Cousin syndrome.[provided by RefSeq, Oct 2009]
ENSG00000196116	Sinusoidal	TDRD7	Tudor domain containing 7	2.4	The protein encoded by this gene belongs to the Tudor family of proteins. This protein contains conserved Tudor domains and LOTUS domains. It is a component of RNA granules, which function in RNA processing. Mutations in this gene have been associated with cataract formation in mouse and human. Alternative splicing results in multiple transcript variants. [provided by RefSeq, Nov 2014]
ENSG00000176679	Sinusoidal	TGIF2LY	TGFB-induced factor homeobox 2-like, Y-linked	0	This gene encodes a member of the TALE/TGIF homeobox family of transcription factors. This gene lies within the male specific region of chromosome Y, in a block of sequence that is thought to be the result of a large X-to-Y transposition. The C-terminus of this protein is divergent from that of its chromosome X homolog (TGIF2LX), suggesting that this protein may act as a regulator of TGIF2LX. [pr…
ENSG00000221944	Sinusoidal	TIGD1	Tigger transposable element derived 1	0.4	The protein encoded by this gene belongs to the tigger subfamily of the pogo superfamily of DNA-mediated transposons in humans. These proteins are related to DNA transposons found in fungi and nematodes, and more distantly to the Tc1 and mariner transposases. They are also very similar to the major mammalian centromere protein B. The exact function of this gene is not known. [provided by RefSeq, …
ENSG00000171914	Sinusoidal	TLN2	Talin 2	0.6	This gene encodes a protein related to talin 1, a cytoskeletal protein that plays a significant role in the assembly of actin filaments and in spreading and migration of various cell types, including fibroblasts and osteoclasts. This protein has a different pattern of expression compared to talin 1 but, like talin 1, is thought to associate with unique transmembrane receptors to form novel linkag…
ENSG00000139644	Sinusoidal	TMBIM6	Transmembrane BAX inhibitor motif containing 6	586.6
ENSG00000170537	Sinusoidal	TMC7	Transmembrane channel-like 7	0
ENSG00000167619	Sinusoidal	TMEM145	Transmembrane protein 145	0
ENSG00000152154	Sinusoidal	TMEM178A	Transmembrane protein 178A	0.8
ENSG00000170417	Sinusoidal	TMEM182	Transmembrane protein 182	0.3
ENSG00000206432	Sinusoidal	TMEM200C	Transmembrane protein 200C	0.1
ENSG00000234224	Sinusoidal	TMEM229A	Transmembrane protein 229A	0
ENSG00000155755	Sinusoidal	TMEM237	Transmembrane protein 237	0.2	The protein encoded by this gene is a tetraspanin protein that is thought to be involved in WNT signaling. Defects in this gene are a cause of Joubert syndrome-14. Two transcript variants encoding different isoforms have been found for this gene. [provided by RefSeq, Jan 2012]
ENSG00000187600	Sinusoidal	TMEM247	Transmembrane protein 247	0
ENSG00000129925	Sinusoidal	TMEM8A	Transmembrane protein 8A	7.7
ENSG00000186891	Sinusoidal	TNFRSF18	Tumor necrosis factor receptor superfamily, member 18	0.1	This gene encodes a member of the TNF-receptor superfamily. The encoded receptor has been shown to have increased expression upon T-cell activation, and it is thought to play a key role in dominant immunological self-tolerance maintained by CD25(+)CD4(+) regulatory T cells. Knockout studies in mice also suggest the role of this receptor is in the regulation of CD3-driven T-cell activation and pro…
ENSG00000077097	Sinusoidal	TOP2B	Topoisomerase (DNA) II beta 180kDa	11.6	This gene encodes a DNA topoisomerase, an enzyme that controls and alters the topologic states of DNA during transcription. This nuclear enzyme is involved in processes such as chromosome condensation, chromatid separation, and the relief of torsional stress that occurs during DNA transcription and replication. It catalyzes the transient breaking and rejoining of two strands of duplex DNA which a…
ENSG00000175274	Sinusoidal	TP53I11	Tumor protein p53 inducible protein 11	4.2
ENSG00000111907	Sinusoidal	TPD52L1	Tumor protein D52-like 1	21.1	This gene encodes a member of the tumor protein D52 (TPD52) family. The encoded protein contains a coiled-coil domain and may form homo- or hetero-dimer with TPD52 family members. The protein is reported to be involved in cell proliferation and calcium signaling. It also interacts with the mitogen-activated protein kinase kinase kinase 5 (MAP3K5/ASK1) and positively regulates MAP3K5-induced apopt…
ENSG00000101150	Sinusoidal	TPD52L2	Tumor protein D52-like 2	11.1	This gene encodes a member of the tumor protein D52-like family. These proteins are characterized by an N-terminal coiled-coil motif that is used to form homo- and heteromeric complexes with other tumor protein D52-like proteins. Expression of this gene may be a marker for breast cancer and acute lymphoblastic leukemia. Alternatively spliced transcript variants encoding multiple isoforms have bee…
ENSG00000176058	Sinusoidal	TPRN	Taperin	1.6	This locus encodes a sensory epithelial protein. It was defined by linkage analysis in three Pakistani families to lie between D9S1818 (centromeric) and D9SH6 (telomeric). Mutations at this locus have been associated with autosomal recessive deafness. [provided by RefSeq, Oct 2010]
ENSG00000172236	Sinusoidal	TPSAB1	Tryptase alpha/beta 1	1.3	Tryptases comprise a family of trypsin-like serine proteases, the peptidase family S1. Tryptases are enzymatically active only as heparin-stabilized tetramers, and they are resistant to all known endogenous proteinase inhibitors. Several tryptase genes are clustered on chromosome 16p13.3. These genes are characterized by several distinct features. They have a highly conserved 3' UTR and contain t…
ENSG00000175104	Sinusoidal	TRAF6	TNF receptor-associated factor 6, E3 ubiquitin protein ligase	2.3	The protein encoded by this gene is a member of the TNF receptor associated factor (TRAF) protein family. TRAF proteins are associated with, and mediate signal transduction from, members of the TNF receptor superfamily. This protein mediates signaling from members of the TNF receptor superfamily as well as the Toll/IL-1 family. Signals from receptors such as CD40, TNFSF11/RANCE and IL-1 have been…
ENSG00000106785	Sinusoidal	TRIM14	Tripartite motif containing 14	6.1	The protein encoded by this gene is a member of the tripartite motif (TRIM) family. The TRIM motif includes three zinc-binding domains, a RING, a B-box type 1 and a B-box type 2, and a coiled-coil region. The protein localizes to cytoplasmic bodies and its function has not been determined. Alternative splicing results in multiple transcript variants. [provided by RefSeq, Mar 2010]
ENSG00000166326	Sinusoidal	TRIM44	Tripartite motif containing 44	5	This gene encodes a member of the tripartite motif (TRIM) family. The TRIM motif includes three zinc-binding domains, namely a RING, a B-box type 1 and a B-box type 2, and a coiled-coil region. [provided by RefSeq, Jul 2008]
ENSG00000169871	Sinusoidal	TRIM56	Tripartite motif containing 56	1.5
ENSG00000187688	Sinusoidal	TRPV2	Transient receptor potential cation channel, subfamily V, member 2	1.7	This gene encodes an ion channel that is activated by high temperatures above 52 degrees Celsius. The protein may be involved in transduction of high-temperature heat responses in sensory ganglia. It is thought that in other tissues the channel may be activated by stimuli other than heat. [provided by RefSeq, Jul 2008]
ENSG00000166925	Sinusoidal	TSC22D4	TSC22 domain family, member 4	3.4	TSC22D4 is a member of the TSC22 domain family of leucine zipper transcriptional regulators (see TSC22D3; MIM 300506) (Kester et al., 1999 [PubMed 10488076]; Fiorenza et al., 2001 [PubMed 11707329]).[supplied by OMIM, Mar 2008]
ENSG00000108219	Sinusoidal	TSPAN14	Tetraspanin 14	9
ENSG00000136925	Sinusoidal	TSTD2	Thiosulfate sulfurtransferase (rhodanese)-like domain containing 2	2.8
ENSG00000196230	Sinusoidal	TUBB	Tubulin, beta class I	80.1
ENSG00000128791	Sinusoidal	TWSG1	Twisted gastrulation BMP signaling modulator 1	4.1
ENSG00000198874	Sinusoidal	TYW1	TRNA-yW synthesizing protein 1 homolog (S. cerevisiae)	4.1	Wybutosine (yW) is a hypermodified guanosine found in phenylalanine tRNA adjacent to the anticodon that stabilizes codon-anticodon interactions in the ribosome. In yeast, the homolog of this gene is essential for the synthesis of wybutosine. [provided by RefSeq, Dec 2012]
ENSG00000109332	Sinusoidal	UBE2D3	Ubiquitin-conjugating enzyme E2D 3	63.4	The modification of proteins with ubiquitin is an important cellular mechanism for targeting abnormal or short-lived proteins for degradation. Ubiquitination involves at least three classes of enzymes: ubiquitin-activating enzymes, or E1s, ubiquitin-conjugating enzymes, or E2s, and ubiquitin-protein ligases, or E3s. This gene encodes a member of the E2 ubiquitin-conjugating enzyme family. This en…
ENSG00000185019	Sinusoidal	UBOX5	U-box domain containing 5	0.8	This gene encodes a U-box domain containing protein. The encoded protein interacts with E2 enzymes and may play a role in the ubiquitination pathway. Alternate splicing results in multiple transcript variants. [provided by RefSeq, Jun 2012]
ENSG00000131019	Sinusoidal	ULBP3	UL16 binding protein 3	0.3
ENSG00000183878	Sinusoidal	UTY	Ubiquitously transcribed tetratricopeptide repeat containing, Y-linked	1.1	This gene encodes a protein containing tetratricopeptide repeats which are thought to be involved in protein-protein interactions. The encoded protein is also a minor histocompatibility antigen which may induce graft rejection of male stem cell grafts. A large number of alternatively spliced transcripts have been observed for this gene, but the full length nature of some of these variants has not…
ENSG00000117533	Sinusoidal	VAMP4	Vesicle-associated membrane protein 4	2.9	Synaptobrevins/VAMPs, syntaxins, and the 25-kD synaptosomal-associated protein SNAP25 are the main components of a protein complex involved in the docking and/or fusion of synaptic vesicles with the presynaptic membrane. The protein encoded by this gene is a member of the vesicle-associated membrane protein (VAMP)/synaptobrevin family. This protein may play a role in trans-Golgi network-to-endoso…
ENSG00000035403	Sinusoidal	VCL	Vinculin	11.8	Vinculin is a cytoskeletal protein associated with cell-cell and cell-matrix junctions, where it is thought to function as one of several interacting proteins involved in anchoring F-actin to the membrane. Defects in VCL are the cause of cardiomyopathy dilated type 1W. Dilated cardiomyopathy is a disorder characterized by ventricular dilation and impaired systolic function, resulting in congestiv…
ENSG00000165280	Sinusoidal	VCP	Valosin containing protein	17.2	The protein encoded by this gene is a member of a family that includes putative ATP-binding proteins involved in vesicle transport and fusion, 26S proteasome function, and assembly of peroxisomes. This protein, as a structural protein, is associated with clathrin, and heat-shock protein Hsc70, to form a complex. It has been implicated in a number of cellular events that are regulated during mitos…
ENSG00000205221	Sinusoidal	VIT	Vitrin	0
ENSG00000119541	Sinusoidal	VPS4B	Vacuolar protein sorting 4 homolog B (S. cerevisiae)	10.4	The protein encoded by this gene is a member of the AAA protein family (ATPases associated with diverse cellular activities), and is the homolog of the yeast Vps4 protein. In humans, two paralogs of the yeast protein have been identified. The former share a high degree of aa sequence similarity with each other, and also with yeast Vps4 and mouse Skd1 proteins. Mouse Skd1 (suppressor of K+ transpo…
ENSG00000015285	Sinusoidal	WAS	Wiskott-Aldrich syndrome	1.9	The Wiskott-Aldrich syndrome (WAS) family of proteins share similar domain structure, and are involved in transduction of signals from receptors on the cell surface to the actin cytoskeleton. The presence of a number of different motifs suggests that they are regulated by a number of different stimuli, and interact with multiple proteins. Recent studies have demonstrated that these proteins, dire…
ENSG00000120314	Sinusoidal	WDR55	WD repeat domain 55	2.5
ENSG00000162843	Sinusoidal	WDR64	WD repeat domain 64	0
ENSG00000152763	Sinusoidal	WDR78	WD repeat domain 78	0.5
ENSG00000171804	Sinusoidal	WDR87	WD repeat domain 87	0
ENSG00000196419	Sinusoidal	XRCC6	X-ray repair complementing defective repair in Chinese hamster cells 6	36.2	The p70/p80 autoantigen is a nuclear complex consisting of two subunits with molecular masses of approximately 70 and 80 kDa. The complex functions as a single-stranded DNA-dependent ATP-dependent helicase. The complex may be involved in the repair of nonhomologous DNA ends such as that required for double-strand break repair, transposition, and V(D)J recombination. High levels of autoantibodies …
ENSG00000176105	Sinusoidal	YES1	V-1-1 Yamaguchi sarcoma viral oncogene homolog 1	22.1	This gene is the cellular homolog of the Yamaguchi sarcoma virus oncogene. The encoded protein has tyrosine kinase activity and belongs to the src family of proteins. This gene lies in close proximity to thymidylate synthase gene on chromosome 18, and a corresponding pseudogene has been found on chromosome 22. [provided by RefSeq, Jul 2008]
ENSG00000166913	Sinusoidal	YWHAB	Tyrosine 3-monooxygenase/tryptophan 5-monooxygenase activation protein, beta	33.6	This gene encodes a protein belonging to the 14-3-3 family of proteins, members of which mediate signal transduction by binding to phosphoserine-containing proteins. This highly conserved protein family is found in both plants and mammals. The encoded protein has been shown to interact with RAF1 and CDC25 phosphatases, suggesting that it may play a role in linking mitogenic signaling and the cell…
ENSG00000164924	Sinusoidal	YWHAZ	Tyrosine 3-monooxygenase/tryptophan 5-monooxygenase activation protein, zeta	55.8	This gene product belongs to the 14-3-3 family of proteins which mediate signal transduction by binding to phosphoserine-containing proteins. This highly conserved protein family is found in both plants and mammals, and this protein is 99% identical to the mouse, rat and sheep orthologs. The encoded protein interacts with IRS1 protein, suggesting a role in regulating insulin sensitivity. Several …
ENSG00000204186	Sinusoidal	ZDBF2	Zinc finger, DBF-type containing 2	0.8
ENSG00000186908	Sinusoidal	ZDHHC17	Zinc finger, DHHC-type containing 17	3.2
ENSG00000184517	Sinusoidal	ZFP1	ZFP1 zinc finger protein	5.6
ENSG00000152518	Sinusoidal	ZFP36L2	ZFP36 ring finger protein-like 2	33.1	This gene is a member of the TIS11 family of early response genes. Family members are induced by various agonists such as the phorbol ester TPA and the polypeptide mitogen EGF. The encoded protein contains a distinguishing putative zinc finger domain with a repeating cys-his motif. This putative nuclear transcription factor most likely functions in regulating the response to growth factors. [prov…
ENSG00000179059	Sinusoidal	ZFP42	ZFP42 zinc finger protein	0
ENSG00000169946	Sinusoidal	ZFPM2	Zinc finger protein, FOG family member 2	1.7	The zinc finger protein encoded by this gene is a widely expressed member of the FOG family of transcription factors. The family members modulate the activity of GATA family proteins, which are important regulators of hematopoiesis and cardiogenesis in mammals. It has been demonstrated that the protein can both activate and down-regulate expression of GATA-target genes, suggesting different modul…
ENSG00000196345	Sinusoidal	ZKSCAN7	Zinc finger with KRAB and SCAN domains 7	0.2
ENSG00000163867	Sinusoidal	ZMYM6	Zinc finger, MYM-type 6	1.9
ENSG00000256683	Sinusoidal	ZNF350	Zinc finger protein 350	1.6
ENSG00000138311	Sinusoidal	ZNF365	Zinc finger protein 365	0	This gene encodes several isoforms which have different expression patterns and functions. Mutation in this gene is associated with uric acid nephrolithiasis (UAN). Alternatively spliced variants, encoding distinct proteins, have been identified. [provided by RefSeq, May 2010]
ENSG00000172006	Sinusoidal	ZNF554	Zinc finger protein 554	1.2
ENSG00000167785	Sinusoidal	ZNF558	Zinc finger protein 558	1.5
ENSG00000198440	Sinusoidal	ZNF583	Zinc finger protein 583	0.7
ENSG00000197566	Sinusoidal	ZNF624	Zinc finger protein 624	0.2
ENSG00000198551	Sinusoidal	ZNF627	Zinc finger protein 627	2.1
ENSG00000083814	Sinusoidal	ZNF671	Zinc finger protein 671	0.2
ENSG00000196267	Sinusoidal	ZNF836	Zinc finger protein 836	1.1
ENSG00000178917	Sinusoidal	ZNF852	Zinc finger protein 852	0.3
ENSG00000174276	Sinusoidal	ZNHIT2	Zinc finger, HIT-type containing 2	1.8
ENSG00000267908	Sinusoidal	ZSCAN5D	Zinc finger and SCAN domain containing 5D	0
